# Supplementary material for: Genetic, developmental, and neural changes underlying the evolution of butterfly mate preference
Source: PLoS Biol. 2025 Mar 11;23(3):e3002989. doi: 10.1371/journal.pbio.3002989 (PMC12136153; doi:10.1371/journal.pbio.3002989)
Supplement: S1 Table — Each row indicates one courtship event and whether the male chose the white female (Choice = 1) or yellow female (Choice = 0). The “Contrast YT” variable indicates whether the yellow female in that particular trial (e.g., 2-Oct-08.1) had the melanic Ac patch (see [16] for detail). The “Male Color” variable indicates whether the male had a yellow (1) or white (0) forewing. The “Court Number” variable is a rolling sum of the number of choices that particular male made. Raw whole genome sequencing data for each of the 113 individuals can be found in NCBI BioProject PRJNA802836. (XLSX) [file pbio.3002989.s013.xlsx]

## Sheet: table S1 - Choice Data
table S1. Choice data for 113 males included in the mate choice genome-wide association analysis. Each row indicates one courtship event and whether the male chose the white female (Choice = 1) or yellow female (Choice = 0). The "Contrast YT" variable indicates whether the yellow female in that particular trial (e..g 2-Oct-08.1) had the melanic Ac patch (see Chamberlain et al., 2009, for detail).…
Choice	Male	Day-Trial	Contrast YT	Male Color	Court Number
0	MP013	2-Oct-08.1	1	0	1
1	MP006	2-Oct-08.1	1	1	1
1	MP006	2-Oct-08.1	1	1	2
1	MP006	2-Oct-08.1	1	1	3
1	MP006	2-Oct-08.1	1	1	4
1	MP020	2-Oct-08.1	1	0	1
1	MP010	2-Oct-08.2	0	0	1
0	MP010	2-Oct-08.2	0	0	2
0	MP006	2-Oct-08.2	0	1	5
1	MP004	2-Oct-08.2	0	1	1
0	MP001	2-Oct-08.3	0	1	1
0	MP006	2-Oct-08.3	0	1	6
1	MP004	2-Oct-08.3	0	1	2
0	MP006	2-Oct-08.3	0	1	7
0	MP006	2-Oct-08.3	0	1	8
0	MP006	2-Oct-08.3	0	1	9
0	MP006	2-Oct-08.3	0	1	10
1	MP006	2-Oct-08.3	0	1	11
1	MP006	2-Oct-08.3	0	1	12
1	MP009	2-Oct-08.3	0	0	1
1	MP010	2-Oct-08.3	0	0	3
1	MP010	2-Oct-08.3	0	0	4
1	MP004	2-Oct-08.3	0	1	3
1	MP004	2-Oct-08.3	0	1	4
1	MP005	2-Oct-08.3	0	1	1
0	MP005	2-Oct-08.3	0	1	2
1	MP003	2-Oct-08.3	0	1	1
0	MP002	2-Oct-08.3	0	1	1
1	MP013	2-Oct-08.3	0	0	2
1	MP001	3-Oct-08.1	1	1	2
0	MP006	3-Oct-08.1	1	1	13
0	MP019	5-Oct-08.1	1	0	1
1	MP026	5-Oct-08.1	1	1	1
1	MP006	5-Oct-08.1	1	1	14
1	MP004	5-Oct-08.1	1	1	5
1	MP005	5-Oct-08.1	1	1	3
1	MP005	5-Oct-08.1	1	1	4
0	MP002	5-Oct-08.1	1	1	2
1	MP013	5-Oct-08.2	0	0	3
1	MP013	5-Oct-08.2	0	0	4
0	MP028	5-Oct-08.2	0	1	1
1	MP008	5-Oct-08.2	0	0	1
0	MP005	5-Oct-08.2	0	1	5
0	MP005	5-Oct-08.2	0	1	6
0	MP005	5-Oct-08.2	0	1	7
1	MP025	5-Oct-08.3	1	0	1
1	MP006	7-Oct-08.1	1	1	15
0	MP006	7-Oct-08.1	1	1	16
0	MP004	7-Oct-08.1	1	1	6
0	MP004	7-Oct-08.1	1	1	7
0	MP012	7-Oct-08.1	1	1	1
1	MP013	7-Oct-08.1	1	0	5
0	MP013	7-Oct-08.1	1	0	6
0	MP001	7-Oct-08.1	1	1	3
0	MP001	7-Oct-08.1	1	1	4
0	MP016	7-Oct-08.1	1	1	1
0	MP022	7-Oct-08.2	0	1	1
1	MP013	7-Oct-08.2	0	0	7
0	MP013	7-Oct-08.2	0	0	8
0	MP005	7-Oct-08.2	0	1	8
0	MP005	7-Oct-08.2	0	1	9
1	MP005	7-Oct-08.2	0	1	10
1	MP005	7-Oct-08.2	0	1	11
0	MP001	7-Oct-08.2	0	1	5
0	MP001	7-Oct-08.2	0	1	6
0	MP001	7-Oct-08.2	0	1	7
1	MP008	7-Oct-08.2	0	0	2
1	MP008	7-Oct-08.2	0	0	3
0	MP002	7-Oct-08.2	0	1	3
0	MP006	7-Oct-08.2	0	1	17
0	MP042	9-Oct-08.1	1	0	1
0	MP042	9-Oct-08.1	1	0	2
1	MP013	9-Oct-08.1	1	0	9
1	MP013	9-Oct-08.1	1	0	10
1	MP013	9-Oct-08.1	1	0	11
0	MP013	9-Oct-08.1	1	0	12
0	MP004	9-Oct-08.1	1	1	8
1	MP026	9-Oct-08.1	1	1	2
0	MP026	11-Oct-08.1	0	1	3
0	MP026	11-Oct-08.1	0	1	4
0	MP026	11-Oct-08.1	0	1	5
0	MP026	11-Oct-08.1	0	1	6
0	MP008	11-Oct-08.1	0	0	4
1	MP022	11-Oct-08.2	0	1	2
1	MP026	11-Oct-08.2	0	1	7
0	MP026	11-Oct-08.2	0	1	8
0	MP038	11-Oct-08.2	0	0	1
0	MP039	11-Oct-08.3	1	0	1
0	MP026	11-Oct-08.3	1	1	9
1	MP040	11-Oct-08.3	1	1	1
0	MP040	11-Oct-08.3	1	1	2
1	MP033	11-Oct-08.3	1	1	1
0	MP033	11-Oct-08.3	1	1	2
1	MP013	11-Oct-08.3	1	0	13
1	MP013	11-Oct-08.3	1	0	14
1	MP037	13-Oct-08.2	1	1	1
0	MP037	13-Oct-08.2	1	1	2
1	MP045	13-Oct-08.2	1	0	1
1	MP045	13-Oct-08.2	1	0	2
1	MP042	13-Oct-08.2	1	0	3
1	MP042	13-Oct-08.2	1	0	4
0	MP042	13-Oct-08.2	1	0	5
0	MP033	13-Oct-08.2	1	1	3
0	MP033	13-Oct-08.2	1	1	4
0	MP033	13-Oct-08.2	1	1	5
0	MP033	13-Oct-08.2	1	1	6
0	MP026	13-Oct-08.2	1	1	10
0	MP026	13-Oct-08.2	1	1	11
0	MP026	13-Oct-08.2	1	1	12
1	MP035	13-Oct-08.2	1	0	1
1	MP035	13-Oct-08.2	1	0	2
0	MP035	13-Oct-08.2	1	0	3
1	MP040	13-Oct-08.2	1	1	3
1	MP040	13-Oct-08.2	1	1	4
0	MP040	13-Oct-08.2	1	1	5
0	MP053	13-Oct-08.2	1	1	1
1	MP041	13-Oct-08.2	1	1	1
1	MP038	13-Oct-08.2	1	0	2
1	MP038	13-Oct-08.2	1	0	3
1	MP038	13-Oct-08.2	1	0	4
1	MP038	13-Oct-08.2	1	0	5
1	MP038	13-Oct-08.2	1	0	6
0	MP038	13-Oct-08.2	1	0	7
0	MP038	13-Oct-08.2	1	0	8
1	MP054	13-Oct-08.2	1	0	1
1	MP048	13-Oct-08.2	1	1	1
1	MP048	13-Oct-08.2	1	1	2
0	MP048	13-Oct-08.2	1	1	3
0	MP050	14-Oct-08.1	0	0	1
0	MP042	14-Oct-08.1	0	0	6
0	MP042	14-Oct-08.1	0	0	7
0	MP042	14-Oct-08.1	0	0	8
0	MP042	14-Oct-08.1	0	0	9
0	MP042	14-Oct-08.1	0	0	10
1	MP042	14-Oct-08.1	0	0	11
0	MP053	14-Oct-08.1	0	1	2
0	MP053	14-Oct-08.1	0	1	3
0	MP053	14-Oct-08.1	0	1	4
0	MP026	14-Oct-08.1	0	1	13
0	MP026	14-Oct-08.1	0	1	14
0	MP026	14-Oct-08.1	0	1	15
1	MP026	14-Oct-08.1	0	1	16
0	MP008	14-Oct-08.1	0	0	5
0	MP008	14-Oct-08.1	0	0	6
0	MP008	14-Oct-08.1	0	0	7
0	MP008	14-Oct-08.1	0	0	8
0	MP008	14-Oct-08.1	0	0	9
0	MP008	14-Oct-08.1	0	0	10
0	MP008	14-Oct-08.1	0	0	11
0	MP008	14-Oct-08.1	0	0	12
1	MP008	14-Oct-08.1	0	0	13
0	MP033	14-Oct-08.1	0	1	7
0	MP033	14-Oct-08.1	0	1	8
0	MP033	14-Oct-08.1	0	1	9
0	MP033	14-Oct-08.1	0	1	10
0	MP033	14-Oct-08.1	0	1	11
0	MP033	14-Oct-08.1	0	1	12
1	MP035	14-Oct-08.1	0	0	4
1	MP035	14-Oct-08.1	0	0	5
0	MP037	14-Oct-08.1	0	1	3
0	MP037	14-Oct-08.1	0	1	4
0	MP037	14-Oct-08.1	0	1	5
0	MP037	14-Oct-08.1	0	1	6
0	MP037	14-Oct-08.1	0	1	7
0	MP040	14-Oct-08.1	0	1	6
0	MP037	14-Oct-08.2	1	1	8
0	MP037	14-Oct-08.2	1	1	9
1	MP033	14-Oct-08.2	1	1	13
1	MP041	14-Oct-08.2	1	1	2
1	MP008	14-Oct-08.2	1	0	14
1	MP008	14-Oct-08.2	1	0	15
0	MP008	14-Oct-08.2	1	0	16
1	MP040	14-Oct-08.2	1	1	7
1	MP026	14-Oct-08.2	1	1	17
1	MP038	14-Oct-08.2	1	0	9
1	MP038	14-Oct-08.2	1	0	10
1	MP050	14-Oct-08.2	1	0	2
1	MP050	14-Oct-08.2	1	0	3
1	MP050	14-Oct-08.2	1	0	4
1	MP050	14-Oct-08.2	1	0	5
1	MP046	14-Oct-08.2	1	1	1
0	MP046	14-Oct-08.2	1	1	2
0	MP049	14-Oct-08.2	1	1	1
1	MP035	16-Oct-08.1	1	0	6
1	MP035	16-Oct-08.1	1	0	7
0	MP035	16-Oct-08.1	1	0	8
0	MP035	16-Oct-08.1	1	0	9
0	MP006	16-Oct-08.1	1	1	18
1	MP006	16-Oct-08.1	1	1	19
1	MP006	16-Oct-08.1	1	1	20
1	MP006	16-Oct-08.1	1	1	21
1	MP006	16-Oct-08.1	1	1	22
1	MP006	16-Oct-08.1	1	1	23
0	MP037	16-Oct-08.1	1	1	10
0	MP037	16-Oct-08.1	1	1	11
1	MP040	16-Oct-08.1	1	1	8
1	MP040	16-Oct-08.1	1	1	9
1	MP040	16-Oct-08.1	1	1	10
0	MP008	16-Oct-08.1	1	0	17
0	MP008	16-Oct-08.1	1	0	18
1	MP008	16-Oct-08.1	1	0	19
1	MP008	16-Oct-08.1	1	0	20
0	MP049	16-Oct-08.1	1	1	2
0	MP049	16-Oct-08.1	1	1	3
0	MP046	16-Oct-08.1	1	1	3
0	MP046	16-Oct-08.1	1	1	4
1	MP046	16-Oct-08.1	1	1	5
0	MP033	16-Oct-08.1	1	1	14
1	MP026	16-Oct-08.1	1	1	18
1	MP038	16-Oct-08.1	1	0	11
0	MP052	16-Oct-08.1	1	1	1
1	MP042	16-Oct-08.1	1	0	12
1	MP050	16-Oct-08.1	1	0	6
0	MP040	16-Oct-08.2	0	1	11
0	MP033	16-Oct-08.2	0	1	15
1	MP033	16-Oct-08.2	0	1	16
0	MP051	16-Oct-08.2	0	1	1
0	MP051	16-Oct-08.2	0	1	2
1	MP051	16-Oct-08.2	0	1	3
0	MP006	16-Oct-08.2	0	1	24
0	MP006	16-Oct-08.2	0	1	25
0	MP048	16-Oct-08.2	0	1	4
0	MP048	16-Oct-08.2	0	1	5
1	MP048	16-Oct-08.2	0	1	6
0	MP008	16-Oct-08.2	0	0	21
0	MP008	16-Oct-08.2	0	0	22
0	MP035	16-Oct-08.2	0	0	10
0	MP035	16-Oct-08.2	0	0	11
1	MP053	16-Oct-08.2	0	1	5
1	MP046	16-Oct-08.2	0	1	6
0	MP046	16-Oct-08.2	0	1	7
0	MP042	16-Oct-08.2	0	0	13
0	MP042	16-Oct-08.2	0	0	14
0	MP042	16-Oct-08.2	0	0	15
0	MP042	16-Oct-08.2	0	0	16
0	MP042	16-Oct-08.2	0	0	17
0	MP042	16-Oct-08.2	0	0	18
1	MP042	16-Oct-08.2	0	0	19
1	MP042	16-Oct-08.2	0	0	20
1	MP042	16-Oct-08.2	0	0	21
0	MP026	16-Oct-08.2	0	1	19
0	MP026	16-Oct-08.2	0	1	20
1	MP050	16-Oct-08.2	0	0	7
0	MP035	17-Oct-08.1	0	0	12
0	MP035	17-Oct-08.1	0	0	13
1	MP035	17-Oct-08.1	0	0	14
1	MP038	17-Oct-08.1	0	0	12
1	MP038	17-Oct-08.1	0	0	13
1	MP048	17-Oct-08.1	0	1	7
1	MP048	17-Oct-08.1	0	1	8
1	MP048	17-Oct-08.1	0	1	9
0	MP048	17-Oct-08.1	0	1	10
0	MP048	17-Oct-08.1	0	1	11
0	MP048	17-Oct-08.1	0	1	12
0	MP054	17-Oct-08.1	0	0	2
0	MP026	17-Oct-08.1	0	1	21
1	MP033	17-Oct-08.1	0	1	17
1	MP033	17-Oct-08.1	0	1	18
1	MP033	17-Oct-08.1	0	1	19
0	MP033	17-Oct-08.1	0	1	20
0	MP040	17-Oct-08.1	0	1	12
0	MP046	17-Oct-08.1	0	1	8
0	MP046	17-Oct-08.1	0	1	9
1	MP050	17-Oct-08.1	0	0	8
0	MP044	17-Oct-08.1	0	1	1
0	MP044	17-Oct-08.1	0	1	2
1	MP044	17-Oct-08.1	0	1	3
0	MP008	17-Oct-08.1	0	0	23
0	MP008	17-Oct-08.1	0	0	24
0	MP008	17-Oct-08.1	0	0	25
0	MP008	17-Oct-08.1	0	0	26
1	MP008	17-Oct-08.1	0	0	27
1	MP008	17-Oct-08.1	0	0	28
0	MP006	17-Oct-08.1	0	1	26
1	MP042	17-Oct-08.1	0	0	22
0	MP042	17-Oct-08.1	0	0	23
0	MP053	17-Oct-08.1	0	1	6
0	MP053	17-Oct-08.1	0	1	7
1	MP053	17-Oct-08.1	0	1	8
1	MP053	17-Oct-08.1	0	1	9
0	MP051	17-Oct-08.1	0	1	4
0	MP051	17-Oct-08.1	0	1	5
1	MP037	17-Oct-08.1	0	1	12
1	MP052	17-Oct-08.1	0	1	2
0	MP046	18-Oct-08.1	1	1	10
0	MP046	18-Oct-08.1	1	1	11
0	MP046	18-Oct-08.1	1	1	12
0	MP046	18-Oct-08.1	1	1	13
1	MP046	18-Oct-08.1	1	1	14
1	MP046	18-Oct-08.1	1	1	15
0	MP044	18-Oct-08.1	1	1	4
0	MP033	18-Oct-08.1	1	1	21
0	MP033	18-Oct-08.1	1	1	22
0	MP033	18-Oct-08.1	1	1	23
0	MP033	18-Oct-08.1	1	1	24
1	MP033	18-Oct-08.1	1	1	25
0	MP008	18-Oct-08.1	1	0	29
0	MP008	18-Oct-08.1	1	0	30
0	MP008	18-Oct-08.1	1	0	31
0	MP008	18-Oct-08.1	1	0	32
0	MP008	18-Oct-08.1	1	0	33
1	MP008	18-Oct-08.1	1	0	34
1	MP008	18-Oct-08.1	1	0	35
1	MP008	18-Oct-08.1	1	0	36
1	MP008	18-Oct-08.1	1	0	37
1	MP008	18-Oct-08.1	1	0	38
0	MP053	18-Oct-08.1	1	1	10
0	MP053	18-Oct-08.1	1	1	11
0	MP053	18-Oct-08.1	1	1	12
0	MP053	18-Oct-08.1	1	1	13
0	MP053	18-Oct-08.1	1	1	14
0	MP053	18-Oct-08.1	1	1	15
1	MP053	18-Oct-08.1	1	1	16
1	MP053	18-Oct-08.1	1	1	17
0	MP006	18-Oct-08.1	1	1	27
0	MP006	18-Oct-08.1	1	1	28
0	MP051	18-Oct-08.1	1	1	6
0	MP051	18-Oct-08.1	1	1	7
1	MP051	18-Oct-08.1	1	1	8
1	MP051	18-Oct-08.1	1	1	9
0	MP040	18-Oct-08.1	1	1	13
0	MP040	18-Oct-08.1	1	1	14
0	MP040	18-Oct-08.1	1	1	15
1	MP040	18-Oct-08.1	1	1	16
1	MP040	18-Oct-08.1	1	1	17
1	MP040	18-Oct-08.1	1	1	18
1	MP048	18-Oct-08.1	1	1	13
0	MP039	18-Oct-08.1	1	0	2
1	MP039	18-Oct-08.1	1	0	3
1	MP039	18-Oct-08.1	1	0	4
1	MP035	18-Oct-08.1	1	0	15
1	MP035	18-Oct-08.1	1	0	16
1	MP035	18-Oct-08.1	1	0	17
0	MP035	18-Oct-08.1	1	0	18
0	MP049	18-Oct-08.1	1	1	4
0	MP049	18-Oct-08.1	1	1	5
0	MP037	18-Oct-08.1	1	1	13
0	MP037	18-Oct-08.1	1	1	14
0	MP037	18-Oct-08.1	1	1	15
0	MP037	18-Oct-08.1	1	1	16
1	MP037	18-Oct-08.1	1	1	17
0	MP052	18-Oct-08.1	1	1	3
1	MP038	18-Oct-08.1	1	0	14
1	MP038	18-Oct-08.1	1	0	15
1	MP038	18-Oct-08.1	1	0	16
1	MP038	18-Oct-08.1	1	0	17
1	MP038	18-Oct-08.1	1	0	18
1	MP038	18-Oct-08.1	1	0	19
0	MP042	18-Oct-08.1	1	0	24
0	MP043	18-Oct-08.1	1	1	1
0	MP054	18-Oct-08.1	1	0	3
0	MP038	19-Oct-08.1	0	0	20
0	MP038	19-Oct-08.1	0	0	21
1	MP038	19-Oct-08.1	0	0	22
0	MP026	19-Oct-08.1	0	1	22
0	MP035	19-Oct-08.1	0	0	19
0	MP035	19-Oct-08.1	0	0	20
0	MP035	19-Oct-08.1	0	0	21
0	MP035	19-Oct-08.1	0	0	22
1	MP035	19-Oct-08.1	0	0	23
1	MP035	19-Oct-08.1	0	0	24
1	MP035	19-Oct-08.1	0	0	25
1	MP035	19-Oct-08.1	0	0	26
1	MP035	19-Oct-08.1	0	0	27
1	MP051	19-Oct-08.1	0	1	10
1	MP051	19-Oct-08.1	0	1	11
1	MP051	19-Oct-08.1	0	1	12
0	MP051	19-Oct-08.1	0	1	13
0	MP049	19-Oct-08.1	0	1	6
0	MP049	19-Oct-08.1	0	1	7
0	MP049	19-Oct-08.1	0	1	8
0	MP049	19-Oct-08.1	0	1	9
0	MP040	19-Oct-08.1	0	1	19
0	MP040	19-Oct-08.1	0	1	20
1	MP040	19-Oct-08.1	0	1	21
1	MP040	19-Oct-08.1	0	1	22
1	MP040	19-Oct-08.1	0	1	23
1	MP040	19-Oct-08.1	0	1	24
1	MP053	19-Oct-08.1	0	1	18
0	MP053	19-Oct-08.1	0	1	19
0	MP053	19-Oct-08.1	0	1	20
1	MP053	19-Oct-08.1	0	1	21
1	MP053	19-Oct-08.1	0	1	22
1	MP053	19-Oct-08.1	0	1	23
1	MP053	19-Oct-08.1	0	1	24
1	MP053	19-Oct-08.1	0	1	25
0	MP046	19-Oct-08.1	0	1	16
0	MP046	19-Oct-08.1	0	1	17
0	MP046	19-Oct-08.1	0	1	18
1	MP046	19-Oct-08.1	0	1	19
1	MP046	19-Oct-08.1	0	1	20
1	MP050	19-Oct-08.1	0	0	9
0	MP052	19-Oct-08.1	0	1	4
1	MP052	19-Oct-08.1	0	1	5
1	MP052	19-Oct-08.1	0	1	6
0	MP039	19-Oct-08.1	0	0	5
1	MP039	19-Oct-08.1	0	0	6
1	MP039	19-Oct-08.1	0	0	7
1	MP039	19-Oct-08.1	0	0	8
1	MP039	19-Oct-08.1	0	0	9
1	MP039	19-Oct-08.1	0	0	10
1	MP039	19-Oct-08.1	0	0	11
1	MP039	19-Oct-08.1	0	0	12
0	MP048	19-Oct-08.1	0	1	14
0	MP054	19-Oct-08.1	0	0	4
0	MP044	19-Oct-08.1	0	1	5
0	MP044	19-Oct-08.1	0	1	6
0	MP044	19-Oct-08.1	0	1	7
1	MP044	19-Oct-08.1	0	1	8
1	MP044	19-Oct-08.1	0	1	9
1	MP044	19-Oct-08.1	0	1	10
1	MP044	19-Oct-08.1	0	1	11
1	MP044	19-Oct-08.1	0	1	12
1	MP037	19-Oct-08.1	0	1	18
0	MP037	19-Oct-08.1	0	1	19
1	MP052	21-Oct-08.1	1	1	7
1	MP052	21-Oct-08.1	1	1	8
1	MP052	21-Oct-08.1	1	1	9
1	MP052	21-Oct-08.1	1	1	10
0	MP037	21-Oct-08.1	1	1	20
0	MP037	21-Oct-08.1	1	1	21
1	MP037	21-Oct-08.1	1	1	22
0	MP029	21-Oct-08.1	1	1	1
1	MP040	21-Oct-08.1	1	1	25
1	MP053	21-Oct-08.1	1	1	26
0	MP035	21-Oct-08.1	1	0	28
0	MP046	21-Oct-08.1	1	1	21
0	MP049	21-Oct-08.1	1	1	10
0	MP049	21-Oct-08.1	1	1	11
0	MP049	21-Oct-08.1	1	1	12
1	MP049	21-Oct-08.1	1	1	13
0	MP051	21-Oct-08.1	1	1	14
0	MP051	21-Oct-08.1	1	1	15
1	MP051	21-Oct-08.1	1	1	16
1	MP051	21-Oct-08.1	1	1	17
1	MP051	21-Oct-08.1	1	1	18
1	MP050	21-Oct-08.1	1	0	10
1	MP039	21-Oct-08.1	1	0	13
1	MP039	21-Oct-08.1	1	0	14
1	MP044	21-Oct-08.1	1	1	13
0	MP048	21-Oct-08.1	1	1	15
0	MP048	21-Oct-08.1	1	1	16
0	MP037	22-Oct-08.1	1	1	23
0	MP037	22-Oct-08.1	1	1	24
0	MP037	22-Oct-08.1	1	1	25
0	MP037	22-Oct-08.1	1	1	26
0	MP037	22-Oct-08.1	1	1	27
1	MP037	22-Oct-08.1	1	1	28
1	MP037	22-Oct-08.1	1	1	29
0	MP039	22-Oct-08.1	1	0	15
0	MP039	22-Oct-08.1	1	0	16
0	MP039	22-Oct-08.1	1	0	17
1	MP039	22-Oct-08.1	1	0	18
1	MP039	22-Oct-08.1	1	0	19
1	MP039	22-Oct-08.1	1	0	20
0	MP052	22-Oct-08.1	1	1	11
0	MP052	22-Oct-08.1	1	1	12
0	MP052	22-Oct-08.1	1	1	13
0	MP052	22-Oct-08.1	1	1	14
1	MP052	22-Oct-08.1	1	1	15
0	MP044	22-Oct-08.1	1	1	14
0	MP044	22-Oct-08.1	1	1	15
1	MP044	22-Oct-08.1	1	1	16
1	MP054	22-Oct-08.1	1	0	5
1	MP054	22-Oct-08.1	1	0	6
0	MP054	22-Oct-08.1	1	0	7
0	MP051	22-Oct-08.1	1	1	19
0	MP051	22-Oct-08.1	1	1	20
0	MP051	22-Oct-08.1	1	1	21
1	MP051	22-Oct-08.1	1	1	22
1	MP051	22-Oct-08.1	1	1	23
1	MP051	22-Oct-08.1	1	1	24
1	MP051	22-Oct-08.1	1	1	25
0	MP064	22-Oct-08.1	1	1	1
0	MP043	22-Oct-08.1	1	1	2
0	MP067	22-Oct-08.1	1	0	1
0	MP067	22-Oct-08.1	1	0	2
0	MP048	22-Oct-08.1	1	1	17
0	MP048	22-Oct-08.1	1	1	18
0	MP048	22-Oct-08.1	1	1	19
0	MP048	22-Oct-08.1	1	1	20
1	MP048	22-Oct-08.1	1	1	21
1	MP070	22-Oct-08.1	1	0	1
0	MP049	22-Oct-08.1	1	1	14
0	MP049	22-Oct-08.1	1	1	15
1	MP049	22-Oct-08.1	1	1	16
1	MP049	22-Oct-08.1	1	1	17
0	MP041	22-Oct-08.1	1	1	3
0	MP041	22-Oct-08.1	1	1	4
1	MP031	22-Oct-08.1	1	0	1
0	MP049	22-Oct-08.2	1	1	18
1	MP051	22-Oct-08.2	1	1	26
1	MP041	22-Oct-08.2	1	1	5
0	MP039	22-Oct-08.2	1	0	21
0	MP041	23-Oct-08.1	1	1	6
1	MP041	23-Oct-08.1	1	1	7
1	MP041	23-Oct-08.1	1	1	8
1	MP041	23-Oct-08.1	1	1	9
0	MP051	23-Oct-08.1	1	1	27
0	MP070	23-Oct-08.1	1	0	2
1	MP070	23-Oct-08.1	1	0	3
1	MP070	23-Oct-08.1	1	0	4
1	MP070	23-Oct-08.1	1	0	5
1	MP070	23-Oct-08.1	1	0	6
1	MP070	23-Oct-08.1	1	0	7
1	MP070	23-Oct-08.1	1	0	8
1	MP070	23-Oct-08.1	1	0	9
1	MP050	23-Oct-08.1	1	0	11
1	MP050	23-Oct-08.1	1	0	12
1	MP050	23-Oct-08.1	1	0	13
1	MP050	23-Oct-08.1	1	0	14
0	MP044	23-Oct-08.1	1	1	17
0	MP044	23-Oct-08.1	1	1	18
1	MP044	23-Oct-08.1	1	1	19
1	MP044	23-Oct-08.1	1	1	20
1	MP044	23-Oct-08.1	1	1	21
1	MP044	23-Oct-08.1	1	1	22
1	MP052	23-Oct-08.1	1	1	16
1	MP052	23-Oct-08.1	1	1	17
1	MP052	23-Oct-08.1	1	1	18
1	MP052	23-Oct-08.1	1	1	19
0	MP052	23-Oct-08.1	1	1	20
0	MP052	23-Oct-08.1	1	1	21
1	MP052	23-Oct-08.1	1	1	22
0	MP049	23-Oct-08.1	1	1	19
0	MP049	23-Oct-08.1	1	1	20
1	MP054	23-Oct-08.1	1	0	8
1	MP054	23-Oct-08.1	1	0	9
0	MP054	23-Oct-08.1	1	0	10
1	MP067	23-Oct-08.1	1	0	3
1	MP067	23-Oct-08.1	1	0	4
1	MP067	23-Oct-08.1	1	0	5
1	MP067	23-Oct-08.1	1	0	6
1	MP068	23-Oct-08.1	1	0	1
1	MP039	23-Oct-08.1	1	0	22
0	MP039	23-Oct-08.1	1	0	23
0	MP043	23-Oct-08.1	1	1	3
0	MP043	24-Oct-08.1	0	1	4
0	MP043	24-Oct-08.1	0	1	5
0	MP043	24-Oct-08.1	0	1	6
0	MP043	24-Oct-08.1	0	1	7
0	MP043	24-Oct-08.1	0	1	8
1	MP043	24-Oct-08.1	0	1	9
1	MP070	24-Oct-08.1	0	0	10
0	MP070	24-Oct-08.1	0	0	11
0	MP058	24-Oct-08.1	0	1	1
0	MP041	24-Oct-08.1	0	1	10
0	MP041	24-Oct-08.1	0	1	11
0	MP041	24-Oct-08.1	0	1	12
0	MP041	24-Oct-08.1	0	1	13
1	MP041	24-Oct-08.1	0	1	14
1	MP041	24-Oct-08.1	0	1	15
1	MP041	24-Oct-08.1	0	1	16
1	MP041	24-Oct-08.1	0	1	17
0	MP076	24-Oct-08.1	0	0	1
0	MP076	24-Oct-08.1	0	0	2
0	MP076	24-Oct-08.1	0	0	3
0	MP076	24-Oct-08.1	0	0	4
1	MP076	24-Oct-08.1	0	0	5
1	MP076	24-Oct-08.1	0	0	6
0	MP067	24-Oct-08.1	0	0	7
0	MP054	24-Oct-08.1	0	0	11
0	MP054	24-Oct-08.1	0	0	12
0	MP054	24-Oct-08.1	0	0	13
0	MP054	24-Oct-08.1	0	0	14
0	MP054	24-Oct-08.1	0	0	15
0	MP054	24-Oct-08.1	0	0	16
1	MP054	24-Oct-08.1	0	0	17
1	MP054	24-Oct-08.1	0	0	18
1	MP054	24-Oct-08.1	0	0	19
1	MP054	24-Oct-08.1	0	0	20
0	MP050	24-Oct-08.1	0	0	15
0	MP050	24-Oct-08.1	0	0	16
1	MP050	24-Oct-08.1	0	0	17
1	MP050	24-Oct-08.1	0	0	18
0	MP064	24-Oct-08.1	0	1	2
0	MP064	24-Oct-08.1	0	1	3
0	MP064	24-Oct-08.1	0	1	4
0	MP064	24-Oct-08.1	0	1	5
0	MP064	24-Oct-08.1	0	1	6
0	MP064	24-Oct-08.1	0	1	7
0	MP064	24-Oct-08.1	0	1	8
0	MP064	24-Oct-08.1	0	1	9
0	MP064	24-Oct-08.1	0	1	10
0	MP064	24-Oct-08.1	0	1	11
0	MP064	24-Oct-08.1	0	1	12
1	MP064	24-Oct-08.1	0	1	13
1	MP064	24-Oct-08.1	0	1	14
1	MP064	24-Oct-08.1	0	1	15
1	MP064	24-Oct-08.1	0	1	16
0	MP027	24-Oct-08.1	0	1	1
0	MP076	25-Oct-08.1	1	0	7
1	MP076	25-Oct-08.1	1	0	8
1	MP076	25-Oct-08.1	1	0	9
0	MP075	25-Oct-08.1	1	0	1
1	MP075	25-Oct-08.1	1	0	2
1	MP075	25-Oct-08.1	1	0	3
1	MP075	25-Oct-08.1	1	0	4
1	MP075	25-Oct-08.1	1	0	5
0	MP068	25-Oct-08.1	1	0	2
0	MP068	25-Oct-08.1	1	0	3
1	MP068	25-Oct-08.1	1	0	4
1	MP068	25-Oct-08.1	1	0	5
1	MP068	25-Oct-08.1	1	0	6
0	MP070	25-Oct-08.1	1	0	12
0	MP070	25-Oct-08.1	1	0	13
1	MP070	25-Oct-08.1	1	0	14
1	MP070	25-Oct-08.1	1	0	15
0	MP064	25-Oct-08.1	1	1	17
0	MP064	25-Oct-08.1	1	1	18
1	MP050	25-Oct-08.1	1	0	19
1	MP050	25-Oct-08.1	1	0	20
1	MP054	25-Oct-08.1	1	0	21
1	MP054	25-Oct-08.1	1	0	22
1	MP054	25-Oct-08.1	1	0	23
1	MP054	25-Oct-08.1	1	0	24
1	MP041	25-Oct-08.1	1	1	18
1	MP076	26-Oct-08.1	1	0	10
1	MP076	26-Oct-08.1	1	0	11
0	MP070	26-Oct-08.2	0	0	16
1	MP070	26-Oct-08.2	0	0	17
1	MP070	26-Oct-08.2	0	0	18
1	MP070	26-Oct-08.2	0	0	19
1	MP070	26-Oct-08.2	0	0	20
1	MP070	26-Oct-08.2	0	0	21
1	MP070	26-Oct-08.2	0	0	22
0	MP068	26-Oct-08.2	0	0	7
0	MP068	26-Oct-08.2	0	0	8
1	MP068	26-Oct-08.2	0	0	9
1	MP068	26-Oct-08.2	0	0	10
1	MP068	26-Oct-08.2	0	0	11
1	MP068	26-Oct-08.2	0	0	12
1	MP068	26-Oct-08.2	0	0	13
0	MP076	26-Oct-08.2	0	0	12
1	MP076	26-Oct-08.2	0	0	13
1	MP076	26-Oct-08.2	0	0	14
1	MP076	26-Oct-08.2	0	0	15
1	MP076	26-Oct-08.2	0	0	16
1	MP076	26-Oct-08.2	0	0	17
1	MP076	26-Oct-08.2	0	0	18
1	MP076	26-Oct-08.2	0	0	19
0	MP083	26-Oct-08.2	0	1	1
0	MP083	26-Oct-08.2	0	1	2
1	MP083	26-Oct-08.2	0	1	3
1	MP083	26-Oct-08.2	0	1	4
0	MP073	26-Oct-08.2	0	1	1
1	MP064	26-Oct-08.2	0	1	19
0	MP064	26-Oct-08.2	0	1	20
1	MP041	26-Oct-08.2	0	1	19
1	MP078	26-Oct-08.2	0	0	1
1	MP078	26-Oct-08.2	0	0	2
1	MP078	26-Oct-08.2	0	0	3
0	MP027	26-Oct-08.2	0	1	2
1	MP067	26-Oct-08.2	0	0	8
0	MP050	26-Oct-08.2	0	0	21
0	MP050	26-Oct-08.2	0	0	22
0	MP050	26-Oct-08.2	0	0	23
1	MP050	26-Oct-08.2	0	0	24
1	MP050	26-Oct-08.2	0	0	25
0	MP075	26-Oct-08.2	0	0	6
1	MP083	28-Oct-08.1	0	1	5
1	MP083	28-Oct-08.1	0	1	6
1	MP083	28-Oct-08.1	0	1	7
1	MP083	28-Oct-08.1	0	1	8
1	MP070	28-Oct-08.1	0	0	23
0	MP086	28-Oct-08.1	0	1	1
0	MP086	28-Oct-08.1	0	1	2
1	MP086	28-Oct-08.1	0	1	3
1	MP064	28-Oct-08.1	0	1	21
1	MP064	28-Oct-08.1	0	1	22
0	MP064	28-Oct-08.1	0	1	23
1	MP076	28-Oct-08.1	0	0	20
0	MP082	28-Oct-08.1	0	1	1
0	MP043	28-Oct-08.1	0	1	10
0	MP043	28-Oct-08.1	0	1	11
0	MP043	28-Oct-08.1	0	1	12
1	MP043	28-Oct-08.1	0	1	13
0	MP067	28-Oct-08.1	0	0	9
0	MP071	28-Oct-08.1	0	0	1
0	MP071	28-Oct-08.1	0	0	2
0	MP071	28-Oct-08.1	0	0	3
0	MP068	28-Oct-08.2	0	0	14
0	MP043	28-Oct-08.2	0	1	14
0	MP043	28-Oct-08.2	0	1	15
0	MP043	28-Oct-08.2	0	1	16
0	MP043	28-Oct-08.2	0	1	17
1	MP043	28-Oct-08.2	0	1	18
1	MP043	28-Oct-08.2	0	1	19
0	MP075	28-Oct-08.2	0	0	7
0	MP075	28-Oct-08.2	0	0	8
0	MP075	28-Oct-08.2	0	0	9
0	MP075	28-Oct-08.2	0	0	10
0	MP075	28-Oct-08.2	0	0	11
1	MP075	28-Oct-08.2	0	0	12
1	MP075	28-Oct-08.2	0	0	13
1	MP075	28-Oct-08.2	0	0	14
0	MP083	28-Oct-08.2	0	1	9
0	MP083	28-Oct-08.2	0	1	10
0	MP083	28-Oct-08.2	0	1	11
0	MP083	28-Oct-08.2	0	1	12
0	MP083	28-Oct-08.2	0	1	13
0	MP083	28-Oct-08.2	0	1	14
1	MP067	28-Oct-08.2	0	0	10
1	MP067	28-Oct-08.2	0	0	11
0	MP071	28-Oct-08.2	0	0	4
0	MP071	28-Oct-08.2	0	0	5
0	MP071	28-Oct-08.2	0	0	6
1	MP071	28-Oct-08.2	0	0	7
0	MP082	28-Oct-08.2	0	1	2
0	MP078	28-Oct-08.2	0	0	4
1	MP069	28-Oct-08.2	0	0	1
0	MP059	28-Oct-08.2	0	0	1
0	MP082	29-Oct-08.1	1	1	3
0	MP082	29-Oct-08.1	1	1	4
0	MP082	29-Oct-08.1	1	1	5
0	MP041	29-Oct-08.1	1	1	20
1	MP041	29-Oct-08.1	1	1	21
1	MP041	29-Oct-08.1	1	1	22
0	MP075	29-Oct-08.1	1	0	15
1	MP075	29-Oct-08.1	1	0	16
1	MP075	29-Oct-08.1	1	0	17
1	MP075	29-Oct-08.1	1	0	18
1	MP075	29-Oct-08.1	1	0	19
0	MP087	29-Oct-08.1	1	0	1
0	MP085	29-Oct-08.1	1	0	1
1	MP085	29-Oct-08.1	1	0	2
1	MP085	29-Oct-08.1	1	0	3
1	MP085	29-Oct-08.1	1	0	4
1	MP085	29-Oct-08.1	1	0	5
0	MP081	29-Oct-08.1	1	0	1
1	MP081	29-Oct-08.1	1	0	2
1	MP081	29-Oct-08.1	1	0	3
1	MP081	29-Oct-08.1	1	0	4
1	MP083	29-Oct-08.1	1	1	15
1	MP083	29-Oct-08.1	1	1	16
0	MP080	29-Oct-08.1	1	0	1
0	MP080	29-Oct-08.1	1	0	2
0	MP080	29-Oct-08.1	1	0	3
1	MP080	29-Oct-08.1	1	0	4
1	MP080	29-Oct-08.1	1	0	5
1	MP080	29-Oct-08.1	1	0	6
1	MP027	29-Oct-08.1	1	1	3
1	MP043	29-Oct-08.1	1	1	20
1	MP069	29-Oct-08.1	1	0	2
1	MP067	29-Oct-08.1	1	0	12
0	MP067	29-Oct-08.1	1	0	13
0	MP071	29-Oct-08.1	1	0	8
0	MP078	29-Oct-08.1	1	0	5
1	MP091	29-Oct-08.1	1	0	1
1	MP091	29-Oct-08.1	1	0	2
0	MP083	30-Oct-08.1	1	1	17
0	MP083	30-Oct-08.1	1	1	18
0	MP083	30-Oct-08.1	1	1	19
1	MP083	30-Oct-08.1	1	1	20
1	MP083	30-Oct-08.1	1	1	21
0	MP085	30-Oct-08.1	1	0	6
0	MP085	30-Oct-08.1	1	0	7
0	MP085	30-Oct-08.1	1	0	8
1	MP089	30-Oct-08.1	1	1	1
1	MP075	30-Oct-08.1	1	0	20
1	MP075	30-Oct-08.1	1	0	21
1	MP097	30-Oct-08.1	1	0	1
1	MP081	30-Oct-08.1	1	0	5
1	MP086	30-Oct-08.1	1	1	4
0	MP086	30-Oct-08.1	1	1	5
1	MP075	30-Oct-08.2	0	0	22
1	MP075	30-Oct-08.2	0	0	23
1	MP075	30-Oct-08.2	0	0	24
1	MP083	30-Oct-08.2	0	1	22
1	MP083	30-Oct-08.2	0	1	23
1	MP083	30-Oct-08.2	0	1	24
0	MP078	30-Oct-08.2	0	0	6
0	MP078	30-Oct-08.2	0	0	7
0	MP078	30-Oct-08.2	0	0	8
1	MP078	30-Oct-08.2	0	0	9
0	MP080	30-Oct-08.2	0	0	7
0	MP080	30-Oct-08.2	0	0	8
0	MP080	30-Oct-08.2	0	0	9
0	MP080	30-Oct-08.2	0	0	10
0	MP093	30-Oct-08.2	0	0	1
1	MP093	30-Oct-08.2	0	0	2
1	MP093	30-Oct-08.2	0	0	3
0	MP071	30-Oct-08.2	0	0	9
0	MP071	30-Oct-08.2	0	0	10
0	MP071	30-Oct-08.2	0	0	11
0	MP071	30-Oct-08.2	0	0	12
1	MP071	30-Oct-08.2	0	0	13
1	MP087	30-Oct-08.2	0	0	2
1	MP087	30-Oct-08.2	0	0	3
1	MP095	30-Oct-08.2	0	0	1
1	MP095	30-Oct-08.2	0	0	2
0	MP086	30-Oct-08.2	0	1	6
1	MP031	30-Oct-08.2	0	0	2
1	MP091	30-Oct-08.2	0	0	3
0	MP091	30-Oct-08.2	0	0	4
1	MP082	30-Oct-08.2	0	1	6
1	MP098	30-Oct-08.2	0	0	1
1	MP081	30-Oct-08.2	0	0	6
0	MP097	30-Oct-08.2	0	0	2
1	MP091	31-Oct-08.1	1	0	5
1	MP085	31-Oct-08.1	1	0	9
1	MP085	31-Oct-08.1	1	0	10
1	MP085	31-Oct-08.1	1	0	11
1	MP085	31-Oct-08.1	1	0	12
1	MP097	31-Oct-08.1	1	0	3
0	MP086	31-Oct-08.1	1	1	7
1	MP086	31-Oct-08.1	1	1	8
1	MP086	31-Oct-08.1	1	1	9
1	MP086	31-Oct-08.1	1	1	10
0	MP082	31-Oct-08.1	1	1	7
0	MP082	31-Oct-08.1	1	1	8
1	MP082	31-Oct-08.1	1	1	9
1	MP095	31-Oct-08.1	1	0	3
1	MP071	31-Oct-08.1	1	0	14
0	MP071	31-Oct-08.1	1	0	15
1	MP094	31-Oct-08.1	1	1	1
1	MP094	31-Oct-08.1	1	1	2
1	MP098	31-Oct-08.1	1	0	2
0	MP081	31-Oct-08.1	1	0	7
1	MP081	31-Oct-08.1	1	0	8
1	MP081	31-Oct-08.1	1	0	9
1	MP081	31-Oct-08.1	1	0	10
1	MP081	31-Oct-08.1	1	0	11
1	MP081	31-Oct-08.1	1	0	12
1	MP081	31-Oct-08.1	1	0	13
1	MP087	31-Oct-08.1	1	0	4
1	MP087	31-Oct-08.1	1	0	5
1	MP087	31-Oct-08.1	1	0	6
1	MP087	31-Oct-08.1	1	0	7
1	MP087	31-Oct-08.1	1	0	8
0	MP080	31-Oct-08.1	1	0	11
0	MP080	31-Oct-08.1	1	0	12
0	MP080	31-Oct-08.1	1	0	13
0	MP093	1-Nov-08.1	0	0	4
0	MP093	1-Nov-08.1	0	0	5
0	MP086	1-Nov-08.1	0	1	11
0	MP086	1-Nov-08.1	0	1	12
0	MP086	1-Nov-08.1	0	1	13
0	MP086	1-Nov-08.1	0	1	14
0	MP091	1-Nov-08.1	0	0	6
0	MP091	1-Nov-08.1	0	0	7
0	MP091	1-Nov-08.1	0	0	8
0	MP091	1-Nov-08.1	0	0	9
1	MP091	1-Nov-08.1	0	0	10
1	MP091	1-Nov-08.1	0	0	11
1	MP097	1-Nov-08.1	0	0	4
0	MP097	1-Nov-08.1	0	0	5
0	MP082	1-Nov-08.1	0	1	10
0	MP085	1-Nov-08.1	0	0	13
0	MP085	1-Nov-08.1	0	0	14
1	MP085	1-Nov-08.1	0	0	15
1	MP085	1-Nov-08.1	0	0	16
1	MP085	1-Nov-08.1	0	0	17
0	MP071	1-Nov-08.1	0	0	16
0	MP071	1-Nov-08.1	0	0	17
0	MP071	1-Nov-08.1	0	0	18
0	MP071	1-Nov-08.1	0	0	19
0	MP071	1-Nov-08.1	0	0	20
1	MP071	1-Nov-08.1	0	0	21
1	MP071	1-Nov-08.1	0	0	22
1	MP067	1-Nov-08.1	0	0	14
1	MP067	1-Nov-08.1	0	0	15
1	MP067	1-Nov-08.1	0	0	16
0	MP089	1-Nov-08.1	0	1	2
0	MP089	1-Nov-08.1	0	1	3
0	MP089	1-Nov-08.1	0	1	4
0	MP089	1-Nov-08.1	0	1	5
0	MP081	1-Nov-08.1	0	0	14
0	MP081	1-Nov-08.1	0	0	15
0	MP081	1-Nov-08.1	0	0	16
1	MP081	1-Nov-08.1	0	0	17
1	MP081	1-Nov-08.1	0	0	18
1	MP081	1-Nov-08.1	0	0	19
1	MP081	1-Nov-08.1	0	0	20
0	MP080	1-Nov-08.1	0	0	14
0	MP080	1-Nov-08.1	0	0	15
0	MP080	1-Nov-08.1	0	0	16
0	MP080	1-Nov-08.1	0	0	17
0	MP080	1-Nov-08.1	0	0	18
1	MP080	1-Nov-08.1	0	0	19
1	MP080	1-Nov-08.1	0	0	20
0	MP087	1-Nov-08.1	0	0	9
1	MP095	1-Nov-08.1	0	0	4
0	MP095	1-Nov-08.1	0	0	5
1	MP099	1-Nov-08.1	0	0	1
0	MP069	1-Nov-08.1	0	0	3
0	MP031	1-Nov-08.1	0	0	3
0	MP031	1-Nov-08.1	0	0	4
1	MP031	1-Nov-08.1	0	0	5
0	MP071	2-Nov-08.1	0	0	23
1	MP095	2-Nov-08.1	0	0	6
1	MP095	2-Nov-08.1	0	0	7
0	MP097	2-Nov-08.1	0	0	6
1	MP093	2-Nov-08.1	0	0	6
1	MP093	2-Nov-08.1	0	0	7
0	MP102	2-Nov-08.1	0	0	1
0	MP102	2-Nov-08.1	0	0	2
0	MP102	2-Nov-08.1	0	0	3
1	MP102	2-Nov-08.1	0	0	4
0	MP091	2-Nov-08.1	0	0	12
0	MP091	2-Nov-08.1	0	0	13
0	MP091	2-Nov-08.1	0	0	14
1	MP091	2-Nov-08.1	0	0	15
0	MP082	2-Nov-08.1	0	1	11
0	MP082	2-Nov-08.1	0	1	12
1	MP082	2-Nov-08.1	0	1	13
0	MP086	2-Nov-08.1	0	1	15
0	MP099	2-Nov-08.1	0	0	2
1	MP031	2-Nov-08.1	0	0	6
0	MP031	2-Nov-08.1	0	0	7
0	MP098	2-Nov-08.1	0	0	3
0	MP090	2-Nov-08.1	0	0	1
0	MP067	2-Nov-08.1	0	0	17
0	MP085	3-Nov-08.1	0	0	18
0	MP085	3-Nov-08.1	0	0	19
0	MP085	3-Nov-08.1	0	0	20
0	MP085	3-Nov-08.1	0	0	21
0	MP085	3-Nov-08.1	0	0	22
0	MP090	3-Nov-08.1	0	0	2
0	MP090	3-Nov-08.1	0	0	3
0	MP091	3-Nov-08.1	0	0	16
0	MP091	3-Nov-08.1	0	0	17
0	MP091	3-Nov-08.1	0	0	18
0	MP091	3-Nov-08.1	0	0	19
0	MP091	3-Nov-08.1	0	0	20
0	MP091	3-Nov-08.1	0	0	21
0	MP091	3-Nov-08.1	0	0	22
1	MP091	3-Nov-08.1	0	0	23
0	MP059	3-Nov-08.1	0	0	2
0	MP099	3-Nov-08.1	0	0	3
1	MP103	3-Nov-08.1	0	0	1
0	MP103	3-Nov-08.1	0	0	2
0	MP082	3-Nov-08.1	0	1	14
0	MP098	3-Nov-08.1	0	0	4
0	MP069	3-Nov-08.1	0	0	4
0	MP069	3-Nov-08.1	0	0	5
0	MP067	3-Nov-08.1	0	0	18
0	MP067	3-Nov-08.1	0	0	19
0	MP067	3-Nov-08.1	0	0	20
0	MP067	3-Nov-08.1	0	0	21
0	MP067	3-Nov-08.1	0	0	22
0	MP067	3-Nov-08.1	0	0	23
0	MP067	3-Nov-08.1	0	0	24
0	MP086	3-Nov-08.1	0	1	16
0	MP086	3-Nov-08.1	0	1	17
0	MP086	3-Nov-08.1	0	1	18
0	MP086	3-Nov-08.1	0	1	19
0	MP086	3-Nov-08.1	0	1	20
0	MP086	3-Nov-08.1	0	1	21
0	MP086	3-Nov-08.1	0	1	22
0	MP086	3-Nov-08.1	0	1	23
0	MP086	3-Nov-08.1	0	1	24
0	MP086	3-Nov-08.1	0	1	25
0	MP107	3-Nov-08.1	0	0	1
0	MP107	3-Nov-08.1	0	0	2
1	MP107	3-Nov-08.1	0	0	3
0	MP031	3-Nov-08.1	0	0	8
0	MP093	3-Nov-08.1	0	0	8
0	MP093	3-Nov-08.1	0	0	9
0	MP094	3-Nov-08.1	0	1	3
1	MP059	3-Nov-08.2	0	0	3
0	MP093	3-Nov-08.2	0	0	10
0	MP093	3-Nov-08.2	0	0	11
0	MP093	3-Nov-08.2	0	0	12
0	MP093	3-Nov-08.2	0	0	13
0	MP093	3-Nov-08.2	0	0	14
0	MP093	3-Nov-08.2	0	0	15
0	MP093	3-Nov-08.2	0	0	16
0	MP093	3-Nov-08.2	0	0	17
1	MP093	3-Nov-08.2	0	0	18
1	MP093	3-Nov-08.2	0	0	19
1	MP093	3-Nov-08.2	0	0	20
1	MP093	3-Nov-08.2	0	0	21
1	MP093	3-Nov-08.2	0	0	22
1	MP107	3-Nov-08.2	0	0	4
0	MP082	3-Nov-08.2	0	1	15
0	MP082	3-Nov-08.2	0	1	16
1	MP082	3-Nov-08.2	0	1	17
1	MP110	3-Nov-08.2	0	1	1
0	MP110	3-Nov-08.2	0	1	2
0	MP090	3-Nov-08.2	0	0	4
0	MP090	3-Nov-08.2	0	0	5
0	MP090	3-Nov-08.2	0	0	6
0	MP090	3-Nov-08.2	0	0	7
0	MP102	3-Nov-08.2	0	0	5
1	MP099	3-Nov-08.2	0	0	4
0	MP099	3-Nov-08.2	0	0	5
1	MP098	3-Nov-08.2	0	0	5
1	MP098	3-Nov-08.2	0	0	6
0	MP098	3-Nov-08.2	0	0	7
0	MP098	3-Nov-08.2	0	0	8
0	MP087	3-Nov-08.2	0	0	10
0	MP087	3-Nov-08.2	0	0	11
0	MP087	3-Nov-08.2	0	0	12
0	MP087	3-Nov-08.2	0	0	13
1	MP087	3-Nov-08.2	0	0	14
1	MP087	3-Nov-08.2	0	0	15
0	MP096	3-Nov-08.2	0	1	1
0	MP096	3-Nov-08.2	0	1	2
1	MP096	3-Nov-08.2	0	1	3
0	MP094	3-Nov-08.2	0	1	4
0	MP094	3-Nov-08.2	0	1	5
0	MP094	3-Nov-08.2	0	1	6
0	MP087	4-Nov-08.1	0	0	16
0	MP087	4-Nov-08.1	0	0	17
1	MP087	4-Nov-08.1	0	0	18
1	MP090	4-Nov-08.1	0	0	8
0	MP090	4-Nov-08.1	0	0	9
1	MP103	4-Nov-08.1	0	0	3
0	MP082	4-Nov-08.1	0	1	18
0	MP082	4-Nov-08.1	0	1	19
1	MP069	4-Nov-08.1	0	0	6
0	MP069	4-Nov-08.1	0	0	7
0	MP094	4-Nov-08.1	0	1	7
1	MP108	5-Nov-08.1	1	0	1
1	MP108	5-Nov-08.1	1	0	2
1	MP110	5-Nov-08.1	1	1	3
0	MP110	5-Nov-08.1	1	1	4
0	MP107	5-Nov-08.1	1	0	5
1	MP107	5-Nov-08.1	1	0	6
1	MP107	5-Nov-08.1	1	0	7
1	MP099	5-Nov-08.1	1	0	6
1	MP087	5-Nov-08.1	1	0	19
1	MP087	5-Nov-08.1	1	0	20
1	MP087	5-Nov-08.1	1	0	21
0	MP103	5-Nov-08.1	1	0	4
0	MP103	5-Nov-08.1	1	0	5
1	MP103	5-Nov-08.1	1	0	6
0	MP109	5-Nov-08.1	1	1	1
1	MP101	5-Nov-08.1	1	1	1
0	MP094	5-Nov-08.1	1	1	8
0	MP102	6-Nov-08.1	1	0	6
0	MP102	6-Nov-08.1	1	0	7
1	MP102	6-Nov-08.1	1	0	8
1	MP099	6-Nov-08.1	1	0	7
0	MP099	6-Nov-08.1	1	0	8
0	MP089	6-Nov-08.1	1	1	6
0	MP089	6-Nov-08.1	1	1	7
0	MP089	6-Nov-08.1	1	1	8
1	MP089	6-Nov-08.1	1	1	9
1	MP089	6-Nov-08.1	1	1	10
0	MP107	6-Nov-08.1	1	0	8
1	MP107	6-Nov-08.1	1	0	9
1	MP107	6-Nov-08.1	1	0	10
1	MP087	6-Nov-08.1	1	0	22
1	MP087	6-Nov-08.1	1	0	23
0	MP110	6-Nov-08.1	1	1	5
1	MP117	6-Nov-08.1	1	1	1
1	MP108	6-Nov-08.1	1	0	3
0	MP103	6-Nov-08.1	1	0	7
1	MP115	6-Nov-08.1	1	1	1
0	MP115	6-Nov-08.1	1	1	2
1	MP031	7-Nov-08.1	0	0	9
1	MP031	7-Nov-08.1	0	0	10
0	MP031	7-Nov-08.1	0	0	11
0	MP117	7-Nov-08.1	0	1	2
0	MP117	7-Nov-08.1	0	1	3
0	MP117	7-Nov-08.1	0	1	4
0	MP117	7-Nov-08.1	0	1	5
0	MP117	7-Nov-08.1	0	1	6
0	MP117	7-Nov-08.1	0	1	7
0	MP117	7-Nov-08.1	0	1	8
0	MP069	7-Nov-08.1	0	0	8
0	MP069	7-Nov-08.1	0	0	9
0	MP069	7-Nov-08.1	0	0	10
1	MP069	7-Nov-08.1	0	0	11
0	MP103	7-Nov-08.1	0	0	8
0	MP103	7-Nov-08.1	0	0	9
0	MP103	7-Nov-08.1	0	0	10
0	MP103	7-Nov-08.1	0	0	11
0	MP103	7-Nov-08.1	0	0	12
1	MP103	7-Nov-08.1	0	0	13
1	MP103	7-Nov-08.1	0	0	14
1	MP103	7-Nov-08.1	0	0	15
1	MP103	7-Nov-08.1	0	0	16
0	MP108	7-Nov-08.1	0	0	4
0	MP108	7-Nov-08.1	0	0	5
0	MP108	7-Nov-08.1	0	0	6
0	MP108	7-Nov-08.1	0	0	7
0	MP108	7-Nov-08.1	0	0	8
0	MP108	7-Nov-08.1	0	0	9
1	MP108	7-Nov-08.1	0	0	10
0	MP113	7-Nov-08.1	0	1	1
0	MP113	7-Nov-08.1	0	1	2
0	MP107	7-Nov-08.1	0	0	11
0	MP107	7-Nov-08.1	0	0	12
0	MP107	7-Nov-08.1	0	0	13
0	MP107	7-Nov-08.1	0	0	14
1	MP107	7-Nov-08.1	0	0	15
1	MP107	7-Nov-08.1	0	0	16
0	MP089	7-Nov-08.1	0	1	11
0	MP089	7-Nov-08.1	0	1	12
0	MP089	7-Nov-08.1	0	1	13
0	MP089	7-Nov-08.1	0	1	14
1	MP089	7-Nov-08.1	0	1	15
1	MP089	7-Nov-08.1	0	1	16
0	MP110	7-Nov-08.1	0	1	6
0	MP110	7-Nov-08.1	0	1	7
0	MP110	7-Nov-08.1	0	1	8
0	MP110	7-Nov-08.1	0	1	9
1	MP110	7-Nov-08.1	0	1	10
0	MP120	7-Nov-08.1	0	1	1
0	MP120	7-Nov-08.1	0	1	2
1	MP112	7-Nov-08.1	0	0	1
0	MP115	7-Nov-08.1	0	1	3
0	MP099	7-Nov-08.1	0	0	9
0	MP118	7-Nov-08.1	0	0	1
0	MP115	8-Nov-08.1	0	1	4
0	MP103	8-Nov-08.1	0	0	17
1	MP103	8-Nov-08.1	0	0	18
1	MP103	8-Nov-08.1	0	0	19
0	MP110	8-Nov-08.1	0	1	11
0	MP110	8-Nov-08.1	0	1	12
0	MP110	8-Nov-08.1	0	1	13
1	MP110	8-Nov-08.1	0	1	14
1	MP110	8-Nov-08.1	0	1	15
0	MP107	8-Nov-08.1	0	0	17
0	MP107	8-Nov-08.1	0	0	18
0	MP107	8-Nov-08.1	0	0	19
1	MP107	8-Nov-08.1	0	0	20
1	MP107	8-Nov-08.1	0	0	21
0	MP089	8-Nov-08.1	0	1	17
0	MP089	8-Nov-08.1	0	1	18
1	MP116	8-Nov-08.1	0	0	1
1	MP099	8-Nov-08.1	0	0	10
1	MP113	8-Nov-08.1	0	1	3
1	MP108	8-Nov-08.1	0	0	11
1	MP108	8-Nov-08.1	0	0	12
0	MP112	8-Nov-08.1	0	0	2
1	MP102	8-Nov-08.1	0	0	9
0	MP102	8-Nov-08.1	0	0	10
0	MP117	8-Nov-08.1	0	1	9
0	MP123	8-Nov-08.1	0	1	1
0	MP120	9-Nov-08.1	0	1	3
0	MP120	9-Nov-08.1	0	1	4
1	MP120	9-Nov-08.1	0	1	5
0	MP118	9-Nov-08.1	0	0	2
0	MP118	9-Nov-08.1	0	0	3
1	MP118	9-Nov-08.1	0	0	4
1	MP118	9-Nov-08.1	0	0	5
1	MP118	9-Nov-08.1	0	0	6
0	MP103	9-Nov-08.1	0	0	20
0	MP103	9-Nov-08.1	0	0	21
0	MP099	9-Nov-08.1	0	0	11
0	MP099	9-Nov-08.1	0	0	12
0	MP099	9-Nov-08.1	0	0	13
1	MP099	9-Nov-08.1	0	0	14
1	MP099	9-Nov-08.1	0	0	15
1	MP099	9-Nov-08.1	0	0	16
1	MP116	9-Nov-08.1	0	0	2
1	MP116	9-Nov-08.1	0	0	3
1	MP102	9-Nov-08.1	0	0	11
1	MP102	9-Nov-08.1	0	0	12
0	MP117	9-Nov-08.1	0	1	10
0	MP117	9-Nov-08.1	0	1	11
0	MP117	9-Nov-08.1	0	1	12
0	MP117	9-Nov-08.1	0	1	13
1	MP117	9-Nov-08.1	0	1	14
1	MP117	9-Nov-08.1	0	1	15
1	MP117	9-Nov-08.1	0	1	16
1	MP117	9-Nov-08.1	0	1	17
0	MP110	9-Nov-08.1	0	1	16
0	MP110	9-Nov-08.1	0	1	17
0	MP110	9-Nov-08.1	0	1	18
0	MP110	9-Nov-08.1	0	1	19
0	MP110	9-Nov-08.1	0	1	20
0	MP110	9-Nov-08.1	0	1	21
0	MP110	9-Nov-08.1	0	1	22
0	MP110	9-Nov-08.1	0	1	23
0	MP110	9-Nov-08.1	0	1	24
0	MP110	9-Nov-08.1	0	1	25
1	MP110	9-Nov-08.1	0	1	26
1	MP110	9-Nov-08.1	0	1	27
1	MP110	9-Nov-08.1	0	1	28
1	MP110	9-Nov-08.1	0	1	29
1	MP110	9-Nov-08.1	0	1	30
1	MP110	9-Nov-08.1	0	1	31
1	MP110	9-Nov-08.1	0	1	32
1	MP110	9-Nov-08.1	0	1	33
1	MP110	9-Nov-08.1	0	1	34
1	MP110	9-Nov-08.1	0	1	35
0	MP123	9-Nov-08.1	0	1	2
0	MP123	9-Nov-08.1	0	1	3
1	MP123	9-Nov-08.1	0	1	4
1	MP123	9-Nov-08.1	0	1	5
1	MP123	9-Nov-08.1	0	1	6
0	MP114	9-Nov-08.1	0	0	1
0	MP114	9-Nov-08.1	0	0	2
0	MP114	9-Nov-08.1	0	0	3
1	MP114	9-Nov-08.1	0	0	4
0	MP111	9-Nov-08.1	0	1	1
0	MP111	9-Nov-08.1	0	1	2
0	MP111	9-Nov-08.1	0	1	3
0	MP111	9-Nov-08.1	0	1	4
0	MP111	9-Nov-08.1	0	1	5
0	MP111	9-Nov-08.1	0	1	6
0	MP111	9-Nov-08.1	0	1	7
0	MP111	9-Nov-08.1	0	1	8
0	MP111	9-Nov-08.1	0	1	9
1	MP111	9-Nov-08.1	0	1	10
1	MP111	9-Nov-08.1	0	1	11
1	MP111	9-Nov-08.1	0	1	12
1	MP111	9-Nov-08.1	0	1	13
1	MP111	9-Nov-08.1	0	1	14
1	MP111	9-Nov-08.1	0	1	15
0	MP089	9-Nov-08.1	0	1	19
0	MP089	9-Nov-08.1	0	1	20
0	MP089	9-Nov-08.1	0	1	21
1	MP089	9-Nov-08.1	0	1	22
1	MP089	9-Nov-08.1	0	1	23
1	MP089	9-Nov-08.1	0	1	24
1	MP089	9-Nov-08.1	0	1	25
0	MP115	9-Nov-08.1	0	1	5
0	MP115	9-Nov-08.1	0	1	6
0	MP115	9-Nov-08.1	0	1	7
1	MP069	9-Nov-08.1	0	0	12
1	MP121	9-Nov-08.1	0	1	1
1	MP121	9-Nov-08.1	0	1	2
0	MP099	10-Nov-08.1	1	0	17
1	MP099	10-Nov-08.1	1	0	18
1	MP099	10-Nov-08.1	1	0	19
1	MP099	10-Nov-08.1	1	0	20
1	MP099	10-Nov-08.1	1	0	21
0	MP118	10-Nov-08.1	1	0	7
1	MP118	10-Nov-08.1	1	0	8
1	MP118	10-Nov-08.1	1	0	9
1	MP116	10-Nov-08.1	1	0	4
0	MP116	10-Nov-08.1	1	0	5
1	MP108	10-Nov-08.1	1	0	13
1	MP108	10-Nov-08.1	1	0	14
0	MP117	10-Nov-08.1	1	1	18
0	MP117	10-Nov-08.1	1	1	19
1	MP117	10-Nov-08.1	1	1	20
1	MP117	10-Nov-08.1	1	1	21
1	MP117	10-Nov-08.1	1	1	22
1	MP117	10-Nov-08.1	1	1	23
1	MP117	10-Nov-08.1	1	1	24
0	MP113	10-Nov-08.1	1	1	4
0	MP113	10-Nov-08.1	1	1	5
1	MP113	10-Nov-08.1	1	1	6
1	MP113	10-Nov-08.1	1	1	7
1	MP102	10-Nov-08.1	1	0	13
1	MP102	10-Nov-08.1	1	0	14
0	MP111	10-Nov-08.1	1	1	16
0	MP111	10-Nov-08.1	1	1	17
0	MP111	10-Nov-08.1	1	1	18
1	MP111	10-Nov-08.1	1	1	19
1	MP111	10-Nov-08.1	1	1	20
1	MP111	10-Nov-08.1	1	1	21
1	MP069	10-Nov-08.1	1	0	13
1	MP069	10-Nov-08.1	1	0	14
1	MP115	10-Nov-08.1	1	1	8
0	MP120	10-Nov-08.1	1	1	6
1	MP120	10-Nov-08.1	1	1	7
1	MP112	10-Nov-08.1	1	0	3
1	MP112	10-Nov-08.1	1	0	4
1	MP112	10-Nov-08.1	1	0	5
1	MP112	10-Nov-08.1	1	0	6
1	MP121	10-Nov-08.1	1	1	3
0	MP121	10-Nov-08.1	1	1	4
0	MP101	10-Nov-08.1	1	1	2
0	MP113	11-Nov-08.1	1	1	8
1	MP069	11-Nov-08.2	0	0	15
0	MP113	11-Nov-08.2	0	1	9
0	MP113	11-Nov-08.2	0	1	10
0	MP113	11-Nov-08.2	0	1	11
1	MP113	11-Nov-08.2	0	1	12
0	MP108	11-Nov-08.2	0	0	15
0	MP108	11-Nov-08.2	0	0	16
0	MP108	11-Nov-08.2	0	0	17
0	MP121	11-Nov-08.2	0	1	5
0	MP121	11-Nov-08.2	0	1	6
0	MP118	11-Nov-08.2	0	0	10
0	MP118	11-Nov-08.2	0	0	11
1	MP102	11-Nov-08.2	0	0	15
1	MP102	11-Nov-08.2	0	0	16
0	MP102	11-Nov-08.2	0	0	17
1	MP114	11-Nov-08.2	0	0	5
0	MP115	11-Nov-08.2	0	1	9
1	MP120	12-Nov-08.1	0	1	8
1	MP120	12-Nov-08.1	0	1	9
0	MP120	12-Nov-08.1	0	1	10
1	MP127	12-Nov-08.1	0	1	1
0	MP127	12-Nov-08.1	0	1	2
0	MP118	12-Nov-08.1	0	0	12
0	MP118	12-Nov-08.1	0	0	13
1	MP118	12-Nov-08.1	0	0	14
1	MP118	12-Nov-08.1	0	0	15
1	MP118	12-Nov-08.1	0	0	16
0	MP125	12-Nov-08.1	0	0	1
1	MP114	12-Nov-08.1	0	0	6
0	MP122	12-Nov-08.1	0	0	1
1	MP122	12-Nov-08.1	0	0	2
1	MP122	12-Nov-08.1	0	0	3
1	MP108	12-Nov-08.1	0	0	18
1	MP108	12-Nov-08.1	0	0	19
1	MP108	12-Nov-08.1	0	0	20
1	MP133	12-Nov-08.1	0	0	1
1	MP112	12-Nov-08.1	0	0	7
0	MP112	12-Nov-08.1	0	0	8
1	MP124	12-Nov-08.1	0	1	1
1	MP121	12-Nov-08.1	0	1	7
1	MP121	12-Nov-08.1	0	1	8
0	MP113	12-Nov-08.1	0	1	13
0	MP113	12-Nov-08.1	0	1	14
1	MP113	12-Nov-08.1	0	1	15
1	MP069	12-Nov-08.1	0	0	16
0	MP069	12-Nov-08.1	0	0	17
1	MP132	12-Nov-08.1	0	1	1
0	MP132	12-Nov-08.1	0	1	2
1	MP115	12-Nov-08.1	0	1	10
0	MP145	12-Nov-08.1	0	1	1
0	MP102	12-Nov-08.1	0	0	18
0	MP136	12-Nov-08.1	0	1	1
0	MP112	12-Nov-08.1	0	0	9
0	MP131	12-Nov-08.1	0	1	1
0	MP069	13-Nov-08.1	0	0	18
1	MP069	13-Nov-08.1	0	0	19
1	MP069	13-Nov-08.1	0	0	20
0	MP116	13-Nov-08.1	0	0	6
0	MP116	13-Nov-08.1	0	0	7
1	MP059	13-Nov-08.1	0	0	4
1	MP059	13-Nov-08.1	0	0	5
0	MP131	13-Nov-08.1	0	1	2
1	MP136	13-Nov-08.1	0	1	2
1	MP136	13-Nov-08.1	0	1	3
0	MP136	13-Nov-08.1	0	1	4
0	MP143	13-Nov-08.1	0	1	1
0	MP124	13-Nov-08.1	0	1	2
1	MP124	13-Nov-08.1	0	1	3
1	MP124	13-Nov-08.1	0	1	4
1	MP112	13-Nov-08.1	0	0	10
0	MP112	13-Nov-08.1	0	0	11
1	MP133	13-Nov-08.1	0	0	2
0	MP031	13-Nov-08.1	0	0	12
0	MP127	13-Nov-08.1	0	1	3
0	MP114	13-Nov-08.1	0	0	7
1	MP139	13-Nov-08.1	0	0	1
0	MP121	13-Nov-08.1	0	1	9
1	MP121	13-Nov-08.1	0	1	10
1	MP121	13-Nov-08.1	0	1	11
1	MP121	13-Nov-08.1	0	1	12
1	MP121	13-Nov-08.1	0	1	13
0	MP108	13-Nov-08.1	0	0	21
0	MP108	13-Nov-08.1	0	0	22
0	MP128	13-Nov-08.1	0	0	1
0	MP128	13-Nov-08.1	0	0	2
0	MP128	13-Nov-08.1	0	0	3
1	MP128	13-Nov-08.1	0	0	4
1	MP128	13-Nov-08.1	0	0	5
1	MP128	13-Nov-08.1	0	0	6
0	MP140	13-Nov-08.1	0	0	1
0	MP115	13-Nov-08.1	0	1	11
0	MP115	13-Nov-08.1	0	1	12
0	MP118	13-Nov-08.1	0	0	17
0	MP120	13-Nov-08.1	0	1	11
1	MP102	13-Nov-08.1	0	0	19
1	MP124	14-Nov-08.1	0	1	5
1	MP116	14-Nov-08.1	0	0	8
1	MP120	14-Nov-08.1	0	1	12
0	MP118	14-Nov-08.1	0	0	18
1	MP125	14-Nov-08.1	0	0	2
1	MP125	14-Nov-08.1	0	0	3
0	MP134	14-Nov-08.1	0	1	1
0	MP134	14-Nov-08.1	0	1	2
0	MP134	14-Nov-08.1	0	1	3
1	MP134	14-Nov-08.1	0	1	4
0	MP069	14-Nov-08.1	0	0	21
1	MP113	14-Nov-08.1	0	1	16
1	MP142	14-Nov-08.1	0	1	1
0	MP142	14-Nov-08.1	0	1	2
1	MP121	14-Nov-08.1	0	1	14
0	MP122	14-Nov-08.1	0	0	4
1	MP059	14-Nov-08.2	0	0	6
0	MP120	14-Nov-08.2	0	1	13
0	MP120	14-Nov-08.2	0	1	14
1	MP120	14-Nov-08.2	0	1	15
1	MP118	14-Nov-08.2	0	0	19
0	MP118	14-Nov-08.2	0	0	20
1	MP113	14-Nov-08.2	0	1	17
1	MP116	14-Nov-08.2	0	0	9
1	MP128	14-Nov-08.2	0	0	7
0	MP128	14-Nov-08.2	0	0	8
1	MP125	14-Nov-08.2	0	0	4
0	MP143	14-Nov-08.2	0	1	2
0	MP143	14-Nov-08.2	0	1	3
0	MP114	14-Nov-08.2	0	0	8
0	MP114	14-Nov-08.2	0	0	9
1	MP114	14-Nov-08.2	0	0	10
0	MP140	14-Nov-08.2	0	0	2
0	MP145	14-Nov-08.2	0	1	2
0	MP134	14-Nov-08.2	0	1	5
0	MP134	14-Nov-08.2	0	1	6
0	MP134	14-Nov-08.2	0	1	7
0	MP115	14-Nov-08.2	0	1	13
0	MP142	14-Nov-08.2	0	1	3
1	MP069	14-Nov-08.2	0	0	22
1	MP124	14-Nov-08.2	0	1	6
0	MP143	15-Nov-08.1	0	1	4
1	MP116	15-Nov-08.1	0	0	10
0	MP121	15-Nov-08.1	0	1	15
0	MP121	15-Nov-08.1	0	1	16
0	MP121	15-Nov-08.1	0	1	17
1	MP121	15-Nov-08.1	0	1	18
1	MP121	15-Nov-08.1	0	1	19
1	MP124	15-Nov-08.1	0	1	7
0	MP124	15-Nov-08.1	0	1	8
0	MP134	15-Nov-08.1	0	1	8
0	MP120	15-Nov-08.1	0	1	16
0	MP120	15-Nov-08.1	0	1	17
0	MP120	15-Nov-08.1	0	1	18
0	MP120	15-Nov-08.1	0	1	19
0	MP120	15-Nov-08.1	0	1	20
0	MP115	15-Nov-08.1	0	1	14
0	MP115	15-Nov-08.1	0	1	15
0	MP145	15-Nov-08.1	0	1	3
1	MP122	15-Nov-08.1	0	0	5
0	MP112	15-Nov-08.1	0	0	12
1	MP112	15-Nov-08.1	0	0	13
1	MP112	15-Nov-08.1	0	0	14
1	MP112	15-Nov-08.1	0	0	15
1	MP140	15-Nov-08.1	0	0	3
0	MP136	15-Nov-08.1	0	1	5
1	MP122	16-Nov-08.1	0	0	6
0	MP122	16-Nov-08.1	0	0	7
0	MP153	16-Nov-08.1	0	1	1
0	MP153	16-Nov-08.1	0	1	2
0	MP134	16-Nov-08.1	0	1	9
1	MP134	16-Nov-08.1	0	1	10
1	MP134	16-Nov-08.1	0	1	11
0	MP142	16-Nov-08.1	0	1	4
0	MP136	16-Nov-08.1	0	1	6
0	MP136	16-Nov-08.1	0	1	7
0	MP136	16-Nov-08.1	0	1	8
0	MP136	16-Nov-08.1	0	1	9
1	MP136	16-Nov-08.1	0	1	10
0	MP115	16-Nov-08.1	0	1	16
0	MP116	16-Nov-08.1	0	0	11
0	MP116	16-Nov-08.1	0	0	12
0	MP124	16-Nov-08.1	0	1	9
0	MP124	16-Nov-08.1	0	1	10
1	MP124	16-Nov-08.1	0	1	11
1	MP124	16-Nov-08.1	0	1	12
1	MP124	16-Nov-08.1	0	1	13
1	MP121	16-Nov-08.1	0	1	20
0	MP121	16-Nov-08.1	0	1	21
1	MP102	16-Nov-08.1	0	0	20
0	MP102	16-Nov-08.1	0	0	21
1	MP112	16-Nov-08.1	0	0	16
0	MP121	16-Nov-08.2	0	1	22
0	MP102	16-Nov-08.2	0	0	22
1	MP112	16-Nov-08.2	0	0	17
0	MP112	16-Nov-08.2	0	0	18
0	MP136	16-Nov-08.2	0	1	11
0	MP122	16-Nov-08.2	0	0	8
0	MP140	16-Nov-08.2	0	0	4
0	MP134	16-Nov-08.2	0	1	12
0	MP127	16-Nov-08.2	0	1	4
0	MP145	16-Nov-08.2	0	1	4
0	MP147	16-Nov-08.2	0	1	1
0	MP122	17-Nov-08.1	1	0	9
1	MP136	17-Nov-08.1	1	1	12
0	MP131	17-Nov-08.1	1	1	3
1	MP153	17-Nov-08.1	1	1	3
0	MP156	17-Nov-08.1	1	1	1
1	MP155	17-Nov-08.2	0	0	1
1	MP116	17-Nov-08.2	0	0	13
1	MP116	17-Nov-08.2	0	0	14
1	MP122	17-Nov-08.2	0	0	10
0	MP145	17-Nov-08.2	0	1	5
1	MP145	17-Nov-08.2	0	1	6
1	MP145	17-Nov-08.2	0	1	7
1	MP136	17-Nov-08.2	0	1	13
1	MP136	17-Nov-08.2	0	1	14
1	MP140	17-Nov-08.2	0	0	5
0	MP140	17-Nov-08.2	0	0	6
1	MP137	17-Nov-08.2	0	0	1
1	MP131	17-Nov-08.2	0	1	4
0	MP131	17-Nov-08.2	0	1	5
0	MP142	18-Nov-08.1	0	1	5
0	MP114	18-Nov-08.1	0	0	11
0	MP114	18-Nov-08.1	0	0	12
0	MP114	18-Nov-08.1	0	0	13
0	MP114	18-Nov-08.1	0	0	14
1	MP114	18-Nov-08.1	0	0	15
1	MP114	18-Nov-08.1	0	0	16
0	MP134	18-Nov-08.1	0	1	13
0	MP134	18-Nov-08.1	0	1	14
0	MP134	18-Nov-08.1	0	1	15
0	MP134	18-Nov-08.1	0	1	16
0	MP134	18-Nov-08.1	0	1	17
0	MP156	18-Nov-08.1	0	1	2
0	MP156	18-Nov-08.1	0	1	3
0	MP156	18-Nov-08.1	0	1	4
1	MP156	18-Nov-08.1	0	1	5
1	MP156	18-Nov-08.1	0	1	6
0	MP153	18-Nov-08.1	0	1	4
0	MP153	18-Nov-08.1	0	1	5
0	MP163	18-Nov-08.1	0	0	1
1	MP169	18-Nov-08.1	0	0	1
1	MP169	18-Nov-08.1	0	0	2
1	MP165	19-Nov-08.1	0	0	1
1	MP156	19-Nov-08.1	0	1	7
1	MP156	19-Nov-08.1	0	1	8
1	MP156	19-Nov-08.1	0	1	9
0	MP156	19-Nov-08.1	0	1	10
0	MP162	19-Nov-08.1	0	0	1
0	MP156	20-Nov-08.1	1	1	11
0	MP156	20-Nov-08.1	1	1	12
0	MP156	20-Nov-08.1	1	1	13
0	MP156	20-Nov-08.1	1	1	14
1	MP156	20-Nov-08.1	1	1	15
0	MP142	20-Nov-08.1	1	1	6
1	MP163	21-Nov-08.1	1	0	2
0	MP163	21-Nov-08.1	1	0	3
0	MP156	21-Nov-08.1	1	1	16
0	MP165	21-Nov-08.1	1	0	2
1	MP171	21-Nov-08.1	1	0	1
0	MP167	21-Nov-08.2	1	1	1
0	MP167	21-Nov-08.2	1	1	2
0	MP156	21-Nov-08.2	1	1	17
0	MP156	21-Nov-08.2	1	1	18
0	MP156	21-Nov-08.2	1	1	19
0	MP156	21-Nov-08.2	1	1	20
0	MP156	21-Nov-08.2	1	1	21
1	MP165	21-Nov-08.2	1	0	3
1	MP165	21-Nov-08.2	1	0	4
1	MP165	21-Nov-08.2	1	0	5
0	MP142	21-Nov-08.2	1	1	7
