# Supplementary material for: Genetic, developmental, and neural changes underlying the evolution of butterfly mate preference
Source: PLoS Biol. 2025 Mar 11;23(3):e3002989. doi: 10.1371/journal.pbio.3002989 (PMC12136153; doi:10.1371/journal.pbio.3002989)
Supplement: S6 Table — Global FDR (gFDR) values for DESeq2 were calculated using all p-values from all DESeq2 analyses for all tissues using the Benjamini–Hochberg method. gFDRs are shown for each stage-specific comparison. maSigPro model fit p-values and R-squared values are shown. The top blastp hits to the Drosophila melanogaster r6.44 proteome are shown. (XLSX) [file pbio.3002989.s018.xlsx]

## Sheet: table S6 - Lobe DEGs
table S6. Differentially expressed genes between yellow and white Heliconius cydno alithea male optic lobes. Global FDR (gFDR) values for DESeq2 were calculated using all p-values from all DESeq2 analyses for all tissues using the Benjamini-Hochberg method. gFDRs are shown for each stage-specific comparison. maSigPro model fit p-values and R-squared values are shown. The top blastp hits to the Dr…
	DESeq2						maSigPro
Gene	p2 gFDR	p4 gFDR	p6 gFDR	p7 gFDR	Adult gFDR		Significant	p-value	R-squared	eggNOG Name	eggNOG Description	Dmel Gene	Dmel E-value
herzog	0.000448	-0.955	0.942	-0.989	0.926		0	1.99e-09	0.311829	NA	NA	hzg	8.1e-132
deltex	0.00037	0.745	-0.937	-0.193	-1		0	0.00238176	0.131874	NA	NA	dx	6.19e-32
DYRK2	-0.00258	0.999	0.917	-0.392	0.994		0	7.53e-133	0.888569	NA	NA	Dyrk2	0
Hcay201001o.g158	0.000105	-0.996	0.755	-0.955	-0.446		0	4.64e-07	0.298127	ZMAT5	U1 zinc finger	CG31922	1.17e-13
Hcay201001o.g161	0.000106	0.87	0.359	-0.984	0.788		0	6.64e-111	0.884417	RYR2	Ryanodine-sensitive calcium-release channel activity.	RyR	0
Hcay201001o.g446	-5.21e-05	-0.893	0.985	-0.988	-0.983		0	1.51e-51	0.755804	HYDIN	axonemal central apparatus assembly	CG12728	0.55
Hcay201001o.g465	0.00412	-0.949	0.972	0.989	0.951		0	2.35e-39	0.703448	AMACR	CoA-transferase family III	Amacr	2.89e-128
Hcay201001o.g643	0.00796	-0.486	0.918	0.882	-0.831		0	0.00060745	0.176392	-	protein-cysteine S-palmitoyltransferase activity	CG10344	9.02e-56
Hcay201001o.g644	0.00426	1	0.874	-0.863	-0.0862		0	1.71e-11	0.362677	HADHA	3-hydroxyacyl-CoA dehydrogenase_ C-terminal domain	Mtpalpha	2.6e-45
Hcay201001o.g679	0.00326	0.0301	NA	2.68e-06	-0.891		0	2.76e-21	0.55187	-	-	svr	0.76
Hcay201001o.g76	-0.00775	0.999	-0.89	-0.992	0.646		0	1.28e-47	0.739105	-	-	CG18273	0.000137
Hcay201001o.g956	-0.00304	NA	NA	-0.0148	-0.587		0	4.89e-35	0.603392	EYS	Laminin G domain	eys	9.22e-168
Hcay202001o.g116	-1.29e-08	0.938	0.895	0.874	-0.969		0	5.67e-167	0.925879	-	Cobalamin binding. It is involved in the biological process described with cobalamin transport	CG3556	5.1e-164
Hcay202001o.g192	-7.61e-05	-0.932	-0.253	-0.912	-0.848		0	9.58e-41	0.716517	-	Aldo/keto reductase family	CG10638	2.05e-73
Hcay202001o.g216	7.61e-05	-0.915	0.653	0.382	0.461		0	7.36e-11	0.469634	GBA	Glycosyl hydrolase family 30 TIM-barrel domain	Gba1b	4.98e-109
Hcay202001o.g3	-0.00198	-0.587	0.935	0.449	0.965		0	3.58e-91	0.884005	-	Ion channel	CG42340	3.2e-49
Hcay202001o.g516	0.000639	0.16	NA	9.45e-08	-0.896		0	4.74e-26	0.560453	NA	NA	NA	NA
Hcay202001o.g656	0.00512	-0.982	NA	NA	0.964		0	2.67e-09	0.397862	-	-	Lrt	6.5
Hcay203002o.g0	0.00194	-0.92	-0.814	0.951	-0.823		0	5.43e-83	0.841906	-	structural constituent of cuticle	CG42342	1.99e-55
Hcay203003o.g150	-0.000364	-0.962	-0.953	-0.0232	0.424		0	2.99e-31	0.687	NA	NA	NA	NA
Hcay203003o.g286	0.0002	0.869	-0.601	0.887	0.858		0	1.33e-31	0.688054	Mlc1	EF-hand_ calcium binding motif	Mlc1	9.02e-63
Hcay203003o.g448	-0.000591	0.664	0.943	-0.997	-0.341		0	8.25e-62	0.805604	ME1	Malic enzyme_ N-terminal domain	Men	0
Hcay203003o.g558	-0.00778	-0.903	-0.217	0.661	-0.96		0	3.45e-22	0.653722	-	Lipid storage droplets	Lsd-2	2.59e-46
Hcay203003o.g632	-1.17e-07	0.794	0.764	-0.944	0.867		0	2.08e-05	0.355312	G3BP2	Nuclear transport factor 2 (NTF2) domain	rin	7.23e-76
Hcay203003o.g89	-0.00839	-0.987	0.727	0.991	-0.904		0	0	0.957823	eat-18	Domain first found in C1r_ C1s_ uEGF_ and bone morphogenetic protein.	CG42613	0
Hcay204001o.g191	-0.00497	-0.218	0.903	-0.97	0.836		0	5.98e-24	0.703572	-	-	CG13380	0.000157
Hcay204001o.g316	-0.00199	-0.581	0.882	0.855	0.857		0	2e-18	0.574354	-	TPR repeat	Stip1	1.56e-18
Hcay204001o.g344	5.86e-06	-0.242	0.504	-0.223	0.886		0	4.35e-05	0.220613	NA	NA	esn	1.8
Hcay204001o.g39	0.000207	0.639	0.778	0.949	-0.637		0	3.17e-19	0.543643	CHSY1	Chondroitin N-acetylgalactosaminyltransferase	Chsy	0
Hcay204001o.g496	1.97e-17	0.826	0.969	0.699	0.984		0	1.79e-60	0.816862	TRMT1	N2_N2-dimethylguanosine tRNA methyltransferase	Trm1	0
Hcay204001o.g57	0.000922	0.667	0.61	-0.00369	-0.469		0	7.48e-08	0.38753	NA	NA	crb	1.5
Hcay205001o.g148	-0.00659	0.861	0.845	-0.961	-0.878		0	3.92e-11	0.384152	PPP2CB	Protein phosphatase 2A homologues_ catalytic domain.	mts	0
Hcay205001o.g49	-2.26e-05	0.912	0.846	0.869	-0.251		0	1.86e-183	0.926833	MAPK10	Lipopolysaccharide kinase (Kdo/WaaP) family	bsk	0
Hcay205001o.g498	0.00783	0.724	-0.92	0.648	-0.793		0	1.13e-13	0.520115	NA	NA	NA	NA
Hcay205001o.g532	-0.00277	0.668	-0.969	0.887	-0.929		0	8.76e-25	0.645942	-	DNA- binding	lov	4.63e-53
Hcay205001o.g607	-8.79e-05	-0.828	0.981	0.863	-0.767		0	1.43e-80	0.812666	-	-	CG13868	1.18e-76
Hcay205001o.g610	-0.00277	0.984	-0.931	-0.892	-0.804		0	1.15e-12	0.496042	NA	NA	NA	NA
Hcay205001o.g671	-3.45e-07	-0.975	0.974	-0.303	-0.942		0	4.93e-15	0.44579	-	Alkaline phosphatase homologues	Alp6	4.84e-159
Hcay206001o.g155	0.00051	-0.877	-0.995	-0.989	0.973		0	3.19e-82	0.849806	CCDC58	Caffeine-induced death protein 2	Ccdc58	4.3e-46
Hcay206001o.g19	-0.00223	0.968	0.841	0.972	0.92		0	2.9e-187	0.916018	LSAMP	Immunoglobulin C-2 Type	DIP-theta	1.58e-85
Hcay206001o.g20	-1.24e-25	NA	-1.53e-07	NA	NA		0	4.54e-18	0.536498	NA	NA	NA	NA
Hcay206001o.g208	0.000706	-0.985	0.936	0.494	0.981		0	6.9e-94	0.85205	RPE	Ribulose-phosphate 3 epimerase family	Rpe	3.93e-119
Hcay206001o.g36	1.41e-07	0.945	-0.262	0.145	0.896		0	0.00160404	0.157922	NA	NA	NA	NA
Hcay206001o.g377	-6.59e-05	0.932	0.848	-0.984	0.966		0	1.18e-82	0.849842	pHCl	Neurotransmitter-gated ion-channel transmembrane region	pHCl-1	0
Hcay206001o.g416	-9.67e-05	-0.974	0.918	0.0545	0.0611		0	1.67e-18	0.608453	ERCC1	Binding domain of DNA repair protein Ercc1 (rad10/Swi10)	Ercc1	4.89e-90
Hcay206001o.g430	-0.00988	0.827	0.513	0.991	0.745		0	3.98e-181	0.922007	-	-	kairos	1.8e-66
Hcay206001o.g535	0.00142	0.528	-0.945	0.924	0.984		0	3.04e-06	0.282249	AGMO	Fatty acid hydroxylase superfamily	TH1	1.3
Hcay206001o.g6	-8.55e-05	0.829	0.66	-0.779	0.935		0	2.21e-55	0.775886	-	Src homology 2 domains	CG33993	1.52e-47
Hcay206001o.g610	0.00826	0.997	0.998	0.971	-0.914		0	1.34e-51	0.76791	ZEB2	Zinc finger_ C2H2 type	zfh1	1.72e-88
Hcay206001o.g957	0.000966	0.946	-0.989	-0.986	-0.959		0	1.32e-13	0.461627	-	zinc finger	Meics	9.01e-29
Hcay207001o.g183	0.00177	-0.902	0.988	0.126	-0.882		0	6.58e-81	0.816914	LHFPL2	Lipoma HMGIC fusion partner-like protein	CG3770	9.53e-58
Hcay207001o.g329	-2.36e-06	0.984	0.751	-0.849	0.942		0	1.68e-233	0.935086	-	Low-density lipoprotein receptor domain class A	CG32206	2.25e-176
Hcay207001o.g338	-0.00129	-0.994	0.918	-0.957	-0.801		0	2.08e-106	0.867274	GPT2	Aminotransferase class I and II	CG1640	0
Hcay207001o.g429	-0.00237	-0.49	-0.972	0.517	-0.92		0	2.72e-33	0.720644	GNBPA1	Carbohydrate binding domain (family 32)	GNBP3	6.25e-67
Hcay207001o.g509	-0.000125	0.802	0.83	-0.898	0.839		0	NA	NA	NA	NA	NA	NA
Hcay207001o.g614	-0.00311	0.989	0.768	0.966	0.99		0	1.56e-116	0.879158	KCNB1	Ion channel	Shab	0
Hcay207001o.g625	-0.0043	0.952	0.85	-0.71	0.975		0	1.26e-126	0.879417	FBXL16	Leucine Rich repeat	CG32085	0
Hcay207001o.g659	-0.00149	-1	0.469	-0.947	0.909		0	5.84e-168	0.910411	GRIN2B	Ligated ion channel L-glutamate- and glycine-binding site	Nmdar2	0
Hcay207001o.g789	0.000993	0.893	0.971	0.973	0.985		0	8.64e-151	0.907968	HDAC2	Histone deacetylase domain	HDAC1	0
Hcay207001o.g976	-2.44e-05	-0.533	0.954	-0.0486	0.907		0	1.3e-08	0.342448	DHX38	ATP-dependent helicase activity	Prp16	0
Hcay207001o.g977	-8.85e-05	-0.242	0.811	-0.346	0.911		0	2.37e-23	0.645691	-	-	l(1)G0469	2.86e-12
Hcay208001o.g143	5.3e-06	0.649	0.679	0.834	-0.965		0	1.53e-52	0.809635	-	-	CG16799	0.3
Hcay208001o.g186	-0.00278	0.871	0.559	-0.401	0.935		0	1.1e-104	0.8607	PCSK2	Belongs to the peptidase S8 family	amon	1.28e-06
Hcay208001o.g202	-0.009	0.965	0.0979	0.723	0.895		0	1.77e-27	0.631612	-	CD80-like C2-set immunoglobulin domain	side-III	6.42e-63
Hcay208001o.g251	0.000211	0.277	0.626	0.139	-0.388		0	2.6e-12	0.496015	ARID4B	RNA binding activity-knot of a chromodomain	htk	4.04e-62
Hcay208001o.g278	-0.000439	0.869	-0.711	-0.97	-0.888		0	5.81e-25	0.625871	TDRD9	Helicase associated domain (HA2) Add an annotation	spn-E	0
Hcay208001o.g428	0.000571	-0.989	0.893	0.961	-0.591		0	8.97e-95	0.851006	su(Hw)	Metal ion binding	su(Hw)	7.41e-44
Hcay208001o.g436	0.00659	-0.937	0.939	-0.816	-0.756		0	2.25e-41	0.698587	APMAP	Strictosidine synthase	Hmu	0.0002
Hcay208001o.g58	-0.00116	-0.192	0.967	-0.812	0.938		0	7.6e-46	0.747033	-	CD80-like C2-set immunoglobulin domain	side	6.46e-124
Hcay208001o.g627	-0.00215	0.948	0.776	-0.993	0.627		0	3.23e-38	0.714941	AMPD3	Adenosine/AMP deaminase	AMPdeam	0
Hcay208001o.g632	-3.2e-35	0.969	-0.701	0.878	0.991		0	1.69e-08	0.339531	NA	NA	CG3534	0.54
Hcay209001o.g221	-0.00606	0.889	-0.695	0.496	-0.765		0	1.23e-126	0.89792	-	Microtubule-Associated protein Jupiter	Jupiter	1.07e-09
Hcay209001o.g227	0.0045	-0.917	0.977	-0.673	0.949		0	1.69e-91	0.85537	-	intracellular transport	corn	0.6
Hcay209001o.g282	0.00401	-0.994	0.986	0.895	0.745		0	6.99e-07	0.218864	aurB	Protein tyrosine kinase	aurB	1.33e-125
Hcay209001o.g284	-0.000224	-0.891	-0.904	0.688	0.929		0	3.77e-13	0.285608	aurB	Protein tyrosine kinase	aurB	1.31e-125
Hcay209001o.g310	0.00076	0.282	0.633	0.977	-0.906		0	NA	1.55e-16	-	Rad51	spn-D	2.03e-31
Hcay209001o.g318	-1.81e-10	-1	0.994	0.961	0.383		1	7.32e-186	0.917581	-	-	BNIP3	2.3
Hcay209001o.g335	0.00309	0.989	-0.928	-0.937	-0.98		0	9.21e-20	0.611757	-	GTPase-activator protein for Rho-like GTPases	RhoGAP71E	7.18e-171
Hcay209001o.g337	0.0053	0.971	-0.976	0.636	-0.98		0	7.95e-239	0.934247	GMPPB	Bacterial transferase hexapeptide (six repeats)	CG1129	0
Hcay209001o.g338	-0.0075	-0.797	-0.693	-1	0.87		0	1.49e-27	0.627246	MSH6	Component of the post-replicative DNA mismatch repair system (MMR)	Msh6	0
Hcay209001o.g362	-0.009	0.915	-0.437	-0.993	1		0	1.46e-14	0.502246	KATNA1	Catalytic subunit of a complex which severs microtubules in an ATP-dependent manner. Microtubule severing may promote rapid reorganization of cellular microtubule arrays and the release of microtubules from the centrosome following nucleation	Kat60	0
Hcay209001o.g417	0.00517	0.847	1	0.411	-0.975		0	6.05e-111	0.869637	-	EF hand	Dys	0
Hcay209001o.g87	-0.00761	0.898	0.512	-0.85	0.942		0	7.39e-46	0.73826	-	Na+ channel auxiliary subunit TipE	tipE	1.87e-101
Hcay210001o.g1003	-0.000362	-0.984	-0.69	0.831	0.844		0	1.12e-12	0.446277	MCRS1	N-terminal region of micro-spherule protein	Rcd5	1.29e-163
Hcay210001o.g116	0.00853	0.9	0.983	-0.243	0.937		0	1.42e-97	0.870136	-	Melibiase	CG7997	1.28e-108
Hcay210001o.g249	-8.55e-05	0.937	0.905	0.978	1		0	1.39e-134	0.892099	-	Fibronectin type 3 domain	Dscam3	0
Hcay210001o.g294	-3.22e-05	0.961	1	-0.961	0.965		0	7.26e-126	0.89189	-	Fibronectin type 3 domain	Dscam3	0
Hcay210001o.g412	-0.000217	0.949	-0.853	-0.971	-0.976		0	6.92e-123	0.884154	-	Fibronectin type 3 domain	Dscam3	0
Hcay210001o.g415	-0.00467	-0.861	-0.547	0.387	0.956		0	1.5e-12	0.34992	NA	NA	NA	NA
Hcay210001o.g454	-0.00912	0.887	0.975	-0.918	0.998		0	2.24e-108	0.873948	NRF1	Nrf1 activator activation site binding domain	ewg	1.35e-176
Hcay210001o.g509	-0.000831	-0.904	-0.804	0.828	-0.963		0	2.06e-05	0.422637	U2SURP	cwf21	CG9346	0
Hcay210001o.g55	2.38e-05	0.193	-0.9	0.0084	0.726		0	0.00029872	0.265407	EPHX1	Catalyzes juvenile hormone hydrolysis	Jheh1	1.66e-131
Hcay210001o.g618	1.41e-30	0.901	-0.969	0.332	0.268		0	1.52e-06	0.396869	InR	Furin-like cysteine rich region	InR	0
Hcay210001o.g633	-0.00858	0.899	0.779	0.823	0.944		0	0.00652778	0.09319	MOV10L1	S1-like	armi	0
Hcay210001o.g71	0.00998	0.982	0.244	0.718	-0.357		0	2.48e-15	0.53899	ADAMTSL1	Thrombospondin type 1 domain	nolo	0
Hcay210001o.g86	-0.000762	0.896	0.976	0.962	0.903		0	4.08e-25	0.587922	-	copulation	lig	3.69e-22
Hcay211001o.g318	0.00371	0.786	0.658	-0.606	0.98		0	2.2e-22	0.640639	GCLC	Glutamate-cysteine ligase	Gclc	0
Hcay211001o.g321	0.00444	0.00072	0.971	NA	0.904		0	NA	6.74e-16	-	-	PIG-L	0.32
Hcay211001o.g349	-0.00413	0.808	0.963	-0.788	-0.948		0	6.5e-52	0.793832	DDX3X	helicase superfamily c-terminal domain	bel	0
Hcay211001o.g385	2.09e-06	0.985	-0.99	0.452	-0.696		0	1.12e-14	0.51006	-	Indigoidine synthase A like protein	CG2794	4.75e-154
Hcay211001o.g45	0.00163	0.0662	0.297	-0.707	-0.884		0	0.00030312	0.148941	-	Helitron helicase-like domain at N-terminus	CG4968	2
Hcay211001o.g514	-0.00584	-0.218	-0.557	-0.688	0.764		0	1.04e-13	0.477922	-	BESS motif	hng2	0.001
Hcay211001o.g524	4.62e-07	0.149	NA	0.867	0.857		0	2.09e-05	0.29911	-	1-acylglycerol-3-phosphate O-acyltransferase activity	Agpat1	1.49e-60
Hcay211001o.g550	5.71e-08	0.945	0.33	0.667	-0.945		0	5.85e-11	0.375258	-	Leucine Rich repeat	CG14325	1.53e-32
Hcay211001o.g572	-0.000791	0.726	-0.842	0.915	-0.944		0	2.6e-40	0.743744	-	non-haem dioxygenase in morphine synthesis N-terminal	CG33099	2.08e-93
Hcay211001o.g576	2.8e-05	-0.773	1	0.936	0.992		0	7.04e-05	0.159455	-	TFIIIC subunit	CG42516	4.33e-08
Hcay211001o.g581	0.00138	-0.335	0.992	0.987	-0.799		0	0.00140256	0.184716	-	Methyladenine glycosylase	Ehbp1	3.3
Hcay211001o.g670	2.46e-07	0.958	0.138	-0.99	-0.814		0	2.27e-11	0.399064	-	water channel activity	Drip	5.4e-44
Hcay211001o.g671	2.74e-12	0.942	0.115	-0.335	-0.981		0	2.82e-07	0.31191	-	water channel activity	Drip	2.87e-13
Hcay211001o.g681	4.42e-06	0.996	0.986	0.937	-8.12e-06		0	0.00014208	0.226618	-	KR domain	CG7675	8.51e-57
Hcay211001o.g705	-0.00559	0.953	-0.87	0.743	0.602		0	2.11e-29	0.663681	RBM45	RNA recognition motif	CG1316	1.9e-79
Hcay211001o.g743	-0.00276	0.867	-0.588	0.589	0.842		0	0.0023969	0.0907763	NA	NA	CG32813	0.062
Hcay211001o.g765	-0.000301	-0.96	-0.913	-0.921	0.972		0	2.79e-65	0.794276	-	Ctr copper transporter family	Ctr1B	5.11e-10
Hcay211001o.g777	0.0014	0.808	-0.819	0.833	0.999		0	4.05e-06	0.341335	-	Single domain von Willebrand factor type C	CG15202	0.006
Hcay211001o.g789	-6.5e-08	0.825	-0.497	0.532	0.328		0	5.68e-12	0.429373	-	Myb/SANT-like DNA-binding domain	CG32813	0.06
Hcay211001o.g804	-0.00519	-0.94	0.819	0.228	0.877		0	7.4e-28	0.657877	NA	NA	CG7744	1.9
Hcay211001o.g834	-0.00836	-0.972	-0.941	-0.987	-0.931		0	3.48e-12	0.402572	NA	NA	NA	NA
Hcay212001o.g1014	0.00084	0.936	-0.898	-0.966	0.996		0	6.12e-34	0.654702	-	pupariation	hfw	9.79e-94
Hcay212001o.g1034	4.56e-06	0.969	0.955	-0.919	-0.995		0	0.00886458	0.106333	MIOS	Zinc-ribbon like family	mio	1.04e-76
Hcay212001o.g1046	1.23e-14	0.871	0.987	0.971	-0.994		0	1.1e-08	0.368831	NA	NA	CG6733	4.1
Hcay212001o.g125	5.1e-08	-0.328	-0.806	0.973	-0.107		0	5.72e-09	0.356677	NA	NA	NA	NA
Hcay212001o.g639	0.00135	0.0351	NA	NA	0.0428		0	2.86e-12	0.489057	-	Cyclic nucleotide-monophosphate binding domain	sei	2.48e-08
Hcay212001o.g679	3.05e-06	NA	-0.963	-0.000428	-0.246		0	4.53e-05	0.243478	NA	NA	NA	NA
Hcay212001o.g726	-0.00339	-0.984	-0.663	0.986	0.9		0	7.25e-61	0.792786	WDR75	ZnF_C4 abd HLH domain containing kinases domain	l(2)05287	6.34e-20
Hcay212001o.g735	-0.00602	-0.889	-0.981	-0.976	0.995		0	8.24e-85	0.852264	CHCHD2	regulation of cellular response to hypoxia	Chchd2	2.35e-38
Hcay212001o.g792	-5.95e-06	-0.128	-0.894	-0.162	-0.846		0	2.64e-06	0.301982	ppil6	Cyclophilin type peptidyl-prolyl cis-trans isomerase/CLD	Tep2	0.89
Hcay212001o.g908	-3.5e-05	0.989	-0.517	-0.256	0.959		0	1.73e-08	0.366037	Obp59a	odorant binding	Obp59a	8.61e-17
Hcay212001o.g944	0.000139	-0.821	-0.958	0.986	0.981		0	NA	NA	-	EF hand	TpnC25D	1.64e-61
Hcay212001o.g961	0.000791	-0.976	-0.939	0.938	-0.902		0	8.02e-14	0.463492	ZDHHC8	Zinc ion binding	Zdhhc8	8.84e-135
Hcay212001o.g97	-0.000725	0.928	-0.956	0.95	-0.81		0	1.08e-64	0.801224	CASC3	RNA binding. It is involved in the biological process described with mRNA processing	btz	0.000829
Hcay212001o.g978	-0.00224	0.972	-0.775	0.648	-0.944		0	7.46e-07	0.253588	CNOT3	Not1 N-terminal domain_ CCR4-Not complex component	Not3	1.06e-104
Hcay213001o.g22	0.00103	1	-0.616	-0.952	-0.996		0	2.36e-13	0.421273	CNKSR2	Sterile alpha motif.	cnk	7.28e-71
Hcay213001o.g278	-0.00965	-0.59	-0.947	-0.917	-0.482		0	3.24e-23	0.630796	PNLIP	Carboxylic ester hydrolase activity. It is involved in the biological process described with lipid metabolic process	CG5966	1.13e-119
Hcay213001o.g327	-0.000703	-0.626	-0.284	0.784	-0.984		0	7.55e-15	0.529485	TIMP3	Metalloendopeptidase inhibitor activity	Timp	6.63e-26
Hcay213001o.g499	0.00057	-0.984	-0.989	0.872	0.884		0	6.6e-09	0.374845	-	Glutathione S-transferase_ C-terminal domain	GstE6	1.1e-52
Hcay213001o.g51	0.009	0.64	-0.227	0.846	-0.89		0	1.66e-66	0.85369	UNC5C	It is involved in the biological process described with signal transduction	unc-5	8.04e-79
Hcay213001o.g68	0.00436	0.241	0.55	-0.989	-0.736		0	1.37e-20	0.614254	-	Ubiquitin-2 like Rad60 SUMO-like	CG7215	5.16e-28
Hcay213001o.g697	6.65e-10	0.845	0.95	0.00912	-0.999		0	0.00034199	0.224937	CES5A	alpha/beta hydrolase fold	gas	2.78e-95
Hcay213001o.g751	0.00152	-0.961	-1	-0.994	0.944		0	3.15e-17	0.527644	CRBN	metal ion binding	ohgt	2.24e-36
Hcay213001o.g774	-0.00497	0.815	-0.94	-0.82	0.865		0	5.6e-49	0.720342	ARHGAP6	GTPase-activator protein for Rho-like GTPases	RhoGAP102A	1.53e-79
Hcay213001o.g915	-0.00262	-0.942	-0.0439	-0.928	-0.985		0	0.00032434	0.364029	ZFAND2B	AN1-like Zinc finger	CG12795	1.64e-57
Hcay213001o.g973	0.00283	-0.92	-0.978	1	0.933		0	3.24e-15	0.463057	TTC5	Tetratricopeptide repeat protein 5 OB fold domain	sxc	0.7
Hcay214004o.g154	0.000584	0.961	0.886	0.978	-0.85		0	2.15e-43	0.763571	STRA13	CENP-S associating Centromere protein X	Usp14	1.3
Hcay214004o.g161	-0.0061	0.8	-0.571	0.928	-0.721		0	2.52e-15	0.483361	ZNF608	zinc finger	sbb	9.72e-81
Hcay214004o.g162	7.11e-06	0.832	0.67	-0.989	-0.889		0	5.43e-60	0.768051	-	Alpha galactosidase A	CG7997	0
Hcay214004o.g184	-0.0028	-0.959	0.859	0.981	0.984		0	3.63e-15	0.564428	NA	NA	NA	NA
Hcay214004o.g197	0.000424	0.848	-0.887	0.655	0.825		0	1.33e-36	0.774306	PDE8B	3'5'-cyclic nucleotide phosphodiesterase	Pde8	0
Hcay214004o.g241	-0.000521	-0.904	-0.911	-0.54	0.912		0	7.1e-35	0.737947	-	Major Facilitator Superfamily	CG30344	2.04e-66
Hcay214004o.g578	-0.000249	-0.992	0.882	-0.642	0.985		0	1.6e-51	0.781087	CAPZA2	F-actin-capping proteins bind in a Ca(2 )-independent manner to the fast growing ends of actin filaments (barbed end) thereby blocking the exchange of subunits at these ends. Unlike other capping proteins (such as gelsolin and severin)_ these proteins do not sever actin filaments	cpa	3.62e-148
Hcay215003o.g141	4.97e-05	-0.74	0.794	-0.179	0.926		0	3.23e-15	0.488851	INO80C	YL1 nuclear protein C-terminal domain	CG12659	2.28e-22
Hcay215003o.g203	-0.00244	0.828	0.362	-0.952	0.656		0	1.75e-194	0.924591	TBC1D16	Rab GTPase activator activity. It is involved in the biological process described with regulation of Rab GTPase activity	TBC1D16	0
Hcay215003o.g366	0.00049	-0.823	-0.929	0.991	-0.55		0	1.35e-29	0.67376	TWISTNB	SHS2 domain found in N terminus of Rpb7p/Rpc25p/MJ0397	Polr1F	5.63e-29
Hcay215003o.g377	3.05e-06	0.894	-0.914	-0.869	-0.844		0	1.09e-12	0.402797	NA	NA	NA	NA
Hcay215003o.g419	-0.00592	0.928	0.934	0.97	0.268		0	1.74e-09	0.352345	TAF1	binding. It is involved in the biological process described with regulation of transcription_ DNA-templated	Taf1	0
Hcay215003o.g425	-4.47e-08	0.957	-0.761	-0.998	0.0972		0	1.37e-05	0.259447	NUP214	Nuclear pore complex protein	Nup214	3.88e-66
Hcay215003o.g487	-0.00138	-0.842	-0.292	-0.345	0.82		0	8.58e-07	0.326916	-	septate junction assembly	CG15449	1.72e-35
Hcay215003o.g707	0.000534	0.828	0.291	-0.0162	-0.763		0	5.15e-25	0.653158	-	Cytochrome P450	Cyp9f2	8.4e-135
Hcay215003o.g96	0.000558	0.942	-0.995	0.971	-0.803		0	5.12e-10	0.391108	SNX8	PhoX homologous domain_ present in p47phox and p40phox.	Snx1	0.000247
Hcay216002o.g150	-0.00467	0.912	0.642	-0.722	-0.974		0	4.23e-135	0.888013	APLP2	Amyloid A4 N-terminal heparin-binding	Appl	5.07e-91
Hcay216002o.g239	5.68e-06	0.913	0.609	0.0412	0.971		0	6.1e-06	0.271067	NA	NA	CG31029	0.036
Hcay216002o.g307	-0.000377	-0.598	-0.0934	0.968	-0.963		0	7.45e-05	0.281553	-	Coiled-coil protein 142	CG13842	2.82e-93
Hcay216002o.g31	-0.00764	0.843	0.813	-0.977	0.92		0	8.81e-20	0.539914	IRF2BP2	Interferon regulatory factor 2-binding protein zinc finger	Pits	3.6e-43
Hcay216002o.g410	0.00136	-0.942	0.431	-0.971	-0.997		0	3.04e-08	0.401159	RCOR3	ELM2	CoRest	5.99e-100
Hcay216002o.g496	-0.00707	-0.972	0.942	-0.976	0.822		0	2.6e-129	0.900504	-	zinc finger	chn	1.25e-32
Hcay216002o.g577	-7.05e-05	0.915	0.954	0.261	-0.799		0	4.46e-60	0.81763	KLC4	Tetratricopeptide repeat	Klc	0
Hcay217001o.g196	0.00155	0.765	-0.937	0.98	-0.44		0	3.44e-45	0.722062	-	-	Rbp	0.89
Hcay217001o.g203	-0.00326	0.845	-0.905	0.972	-0.405		0	5.24e-06	0.205399	EPHX4	alpha/beta hydrolase fold	CG5377	1.42e-05
Hcay217001o.g303	-2.33e-06	-0.96	-0.967	-0.467	-0.836		0	1.81e-46	0.755883	-	Haemolymph juvenile hormone binding protein (JHBP)	CG10407	2.47e-25
Hcay217001o.g432	0.00378	0.919	0.467	0.962	0.726		0	6.97e-82	0.829435	NA	NA	NA	NA
Hcay217001o.g715	0.000197	0.785	0.405	-0.71	0.827		0	7.67e-22	0.613225	HELQ	helicase superfamily c-terminal domain	mus301	9.72e-166
Hcay217001o.g780	-0.000176	-0.847	-0.165	0.0639	0.866		0	0.00106254	0.205011	SUFU	Suppressor of fused protein (SUFU)	Su(fu)	1.44e-89
Hcay218003o.g273	-2.23e-05	0.176	0.776	-0.979	0.996		0	2.14e-15	0.491981	NA	NA	NA	NA
Hcay218003o.g289	0.00352	0.7	-0.988	0.936	-0.979		0	1.66e-12	0.492958	-	Munc13 (mammalian uncoordinated) homology domain	stac	0
Hcay218003o.g577	0.0085	0.994	0.616	0.594	-0.901		0	2.33e-85	0.830918	MFSD8	Major Facilitator Superfamily	Cln7	8.12e-84
Hcay218003o.g618	-0.00906	0.926	0.728	-0.962	-0.994		0	8.58e-26	0.618498	CLSTN2	Calcium ion binding. It is involved in the biological process described with homophilic cell adhesion via plasma membrane adhesion molecules	Cals	0
Hcay218003o.g704	0.00584	-0.978	-0.806	-0.995	-0.942		0	2.18e-11	0.362101	TMCC2	Predicted transmembrane and coiled-coil 2 protein	Dmtn	9.54e-123
Hcay218003o.g718	-0.00291	0.971	0.903	-0.948	-0.991		0	1.71e-52	0.745725	lgs	B-cell lymphoma 9 protein	lgs	6.96e-17
Hcay218003o.g839	-3.1e-06	0.987	-0.887	0.796	0.889		0	3.44e-05	0.201935	NA	NA	ppk27	2.1
Hcay218003o.g841	0.00795	0.0234	-0.989	0.735	-0.987		0	2.56e-55	0.749754	-	-	Ir60a	2.9
Hcay219001o.g1036	-0.00137	0.676	-0.116	0.993	-0.995		0	2.38e-44	0.732333	-	ATP binding	CG4822	2.29e-151
Hcay219001o.g1042	1.11e-06	0.944	0.995	-0.443	0.976		0	NA	NA	NA	NA	NA	NA
Hcay219001o.g1103	7.12e-06	-0.934	-0.86	0.724	-0.929		0	NA	0	LYST	Beige/BEACH domain	mv	4.5e-140
Hcay219001o.g117	0.00558	0.695	0.704	-0.936	0.989		0	1.99e-136	0.894424	RHOBTB1	BTB/POZ domain	RhoBTB	0
Hcay219001o.g13	-1.6e-05	0.935	0.823	0.965	-0.573		0	3.78e-182	0.920661	-	Vacuolar ATP synthase subunit S1 (ATP6S1)	CG31030	4.99e-31
Hcay219001o.g426	0.000107	0.754	0.592	0.845	-0.98		0	4.86e-38	0.753436	NA	NA	Dif	1.3
Hcay219001o.g430	-0.00583	-0.937	-0.233	-0.936	-0.992		0	1.05e-09	0.497901	DTL	WD domain_ G-beta repeat	l(2)dtl	4.99e-134
Hcay219001o.g444	-0.00528	-0.961	0.95	0.874	0.61		0	1.1e-33	0.699012	BCAS2	Breast carcinoma amplified sequence 2 (BCAS2)	BCAS2	1.92e-81
Hcay219001o.g451	0.000224	-0.962	-0.998	-0.975	-0.444		0	7.06e-17	0.618493	-	-	CG5043	0.44
Hcay219001o.g580	4.68e-11	1	-0.78	-0.995	1		0	8.64e-92	0.839807	-	ATP binding	CG5853	8.41e-142
Hcay219001o.g595	-0.00326	-0.754	-0.874	0.955	-0.832		0	1.6e-58	0.743606	-	ABC-2 type transporter	CG17646	2.49e-157
Hcay219001o.g819	-0.00154	-0.998	0.845	-0.408	0.992		0	1.45e-38	0.752077	-	Transcription activator MBF2	CG30413	0.01
Hcay220003o.g1011	-0.00818	0.856	0.705	0.986	-0.889		0	8.19e-74	0.85488	TTBK2	ATP binding. It is involved in the biological process described with protein phosphorylation	Asator	1.4e-09
Hcay220003o.g156	0.00615	0.951	0.719	-0.912	-0.944		0	1.14e-15	0.556146	SBDS	mature ribosome assembly	lolal	7e-45
Hcay220003o.g365	0.00685	-0.931	0.121	0.989	-0.0537		0	0.00021712	0.176381	NA	NA	CG13252	2.9
Hcay220003o.g377	-0.0039	0.702	0.622	0.982	0.891		0	2.44e-12	0.415516	DNAJB6	DnaJ molecular chaperone homology domain	mrj	2.32e-77
Hcay220003o.g429	-7.91e-05	-0.976	-0.0374	0.965	0.188		1	1.11e-112	0.879636	-	-	CG34398	5.17e-13
Hcay220003o.g445	-0.00764	-0.844	-0.99	0.947	0.343		0	3.06e-46	0.739659	SOAT1	MBOAT_ membrane-bound O-acyltransferase family	CG8112	1.37e-68
Hcay220003o.g46	0.00669	0.989	-0.723	0.966	0.996		0	3.05e-36	0.686149	MED13L	Component of the Mediator complex_ a coactivator involved in regulated transcription of nearly all RNA polymerase II-dependent genes. Mediator functions as a bridge to convey information from gene-specific regulatory proteins to the basal RNA polymerase II transcription machinery. Mediator is recruited to promoters by direct interactions with regulatory proteins and serves as a scaffold for the a…	skd	1.49e-174
Hcay220003o.g492	-0.00418	-0.971	1	0.867	-0.894		0	5.76e-17	0.50186	DEPDC5	negative regulation of TORC1 signaling	Iml1	0
Hcay220003o.g547	-0.00582	-0.947	-0.31	0.964	-0.947		0	4.1e-23	0.584595	PRPF31	snoRNA binding domain_ fibrillarin	Prp31	0
Hcay220003o.g846	-2.61e-06	0.886	-0.757	-0.1	0.661		0	5.49e-30	0.671568	NA	NA	PPP1R15	6.1
Hcay220003o.g895	-2.23e-05	-0.203	-0.588	0.903	0.953		0	2.52e-19	0.58678	-	Catalyzes the reduction of fatty acyl-CoA to fatty alcohols	CG8306	0
Hcay220003o.g924	-3.93e-12	-0.923	0.533	-0.788	0.421		0	9.4e-64	0.830805	TBC1D4	Domain of unknown function (DUF3350)	plx	0
Hcay220003o.g978	-0.00444	0.999	0.926	-0.665	0.991		0	8.82e-69	0.829073	PKNOX2	N-terminal of Homeobox Meis and PKNOX1	hth	3.7e-65
Hcay221001o.g21	-6.11e-07	0.861	0.841	-0.904	-0.893		0	1.24e-56	0.769613	MLLT6	Zinc ion binding	Alh	2.65e-127
Hcay221001o.g228	-1.44e-06	-0.936	-0.968	-0.955	-0.869		0	1.97e-34	0.705878	USP38	Ubiquitin carboxyl-terminal hydrolase	DUBAI	1.32e-94
Hcay221001o.g3	-0.000399	0.901	0.819	-0.834	-0.92		0	2.93e-58	0.77754	DDI2	gag-polyprotein putative aspartyl protease	rngo	1.81e-142
Hcay221001o.g31	-0.00166	0.985	-0.836	0.96	0.938		0	1.64e-11	0.392007	NA	NA	NA	NA
Hcay221001o.g500	0.00845	0.389	0.000492	0.504	0.996		1	8.69e-82	0.810634	KCNT2	Calcium-activated BK potassium channel alpha subunit	SLO2	1.36e-93
Hcay221001o.g511	-0.000611	-0.989	-0.939	-0.993	-0.987		0	1.02e-126	0.888732	-	macromolecule localization	ssp6	2.63e-79
Hcay221001o.g570	-0.00985	0.846	0.627	-0.656	0.889		0	1.94e-151	0.897134	Rdl	Neurotransmitter-gated ion-channel transmembrane region	Rdl	0
Hcay221001o.g582	0.00134	0.275	0.389	-0.399	-0.796		0	1.96e-14	0.490288	NA	NA	NA	NA
Hcay221001o.g6	-0.0004	0.965	0.894	-0.786	0.985		0	9.67e-87	0.863182	BCAR3	RasGEF domain	CG9098	7.24e-81
Hcay221001o.g649	-0.000611	-0.962	-0.961	0.999	-0.728		0	1.76e-98	0.858293	-	Zinc-finger of C2H2 type	crol	1.07e-33
Hcay221001o.g668	0.0006	0.812	0.573	-0.569	-0.901		0	3.32e-14	0.503979	-	-	Glt	3.8
Hcay221001o.g74	0.00732	-0.726	0.904	-0.714	-0.896		0	2.26e-12	0.424899	NA	NA	Zip99C	4.4
Hcay221001o.g750	-0.00816	0.849	0.705	-0.933	0.98		0	4.71e-150	0.899631	STX6	It is involved in the biological process described with Golgi vesicle transport	Syx6	9.25e-77
Hcay221001o.g757	-6.3e-08	-0.262	-0.776	-0.684	-0.745		0	7.99e-129	0.895308	UBE2K	Ubiquitin associated domain	Ubc4	9.46e-103
Hcay221001o.g791	-0.00119	0.891	0.928	-0.965	0.978		0	4.05e-32	0.695766	PAN3	Regulatory subunit of the poly(A)-nuclease (PAN) deadenylation complex_ one of two cytoplasmic mRNA deadenylases involved in general and miRNA-mediated mRNA turnover. PAN specifically shortens poly(A) tails of RNA and the activity is stimulated by poly(A)-binding protein (PABP). PAN deadenylation is followed by rapid degradation of the shortened mRNA tails by the CCR4-NOT complex. Deadenylated mR…	PAN3	2.6e-164
Hcay221001o.g9	-0.000577	0.893	0.82	0.897	-0.953		0	1.57e-56	0.775785	-	Glycosyl hydrolases family 38 N-terminal domain	alpha-Man-IIb	0
HcayUM006.g5	-2.03e-08	1	-0.985	0.84	0.407		0	3.2e-10	0.388467	NA	NA	NA	NA
HcayUM008.g1	5.96e-07	0.783	0.469	-0.936	-0.893		0	2.64e-56	0.769746	-	heterophilic cell-cell adhesion via plasma membrane cell adhesion molecules	beat-Va	1.11e-28
HcayUM011.g0	-0.000474	-0.997	0.969	0.8	-1		0	7.29e-23	0.517806	-	heterophilic cell-cell adhesion via plasma membrane cell adhesion molecules	beat-Va	3.29e-24
HcayUM020.g15	-3.44e-14	-0.318	-0.000347	0.935	-0.788		0	1.93e-16	0.460264	NA	NA	NA	NA
HcayUM030.g12	0.000535	0.559	0.352	4.08e-06	NA		0	1.08e-39	0.673348	NA	NA	NA	NA
HcayUM038.g0	3.57e-06	0.404	0.783	-0.933	-0.997		0	2.29e-09	0.418038	-	-	CG10550	0.056
HcayUM050.g0	-1.02e-05	-0.77	-0.931	-0.772	-0.857		0	4.2e-27	0.618545	NA	NA	NA	NA
HcayUM080.g2	0.00797	0.00072	0.672	-0.167	-0.25		0	7.51e-15	0.457101	NA	NA	NA	NA
HcayUM091.g20	0.00483	0.915	0.95	0.0581	0.881		0	7.55e-09	0.340411	NA	NA	NA	NA
HcayUM096.g4	-0.0034	-0.965	-0.533	-0.929	-0.304		0	0.00356815	0.0854347	NA	NA	NA	NA
HcayUM097.g1	-1.51e-45	-0.923	-0.0521	0.000615	0.981		0	1.05e-11	0.411393	NA	NA	NA	NA
HcayUM100.g0	2.14e-24	0.262	NA	2.82e-07	0.961		0	2.74e-31	0.661151	UBE2K	Ubiquitin associated domain	Ubc4	1.54e-89
HcayUM111.g5	-0.00635	-0.954	-0.892	-0.0378	-0.921		0	2.03e-36	0.681635	NA	NA	NA	NA
HcayUM128.g11	-4.67e-08	-0.913	-0.975	-0.286	-0.65		0	1.29e-10	0.422961	NA	NA	NA	NA
HcayUM128.g12	-0.00523	-0.884	0.858	-6.23e-05	-0.564		0	2.42e-10	0.375225	NA	NA	NA	NA
HcayUM158.g1	-5.31e-05	-0.552	-0.0385	-0.653	-0.926		0	7.25e-33	0.655235	NA	NA	NA	NA
HcayUM158.g12	-1.87e-10	-0.928	-0.835	-0.835	-0.832		0	3.94e-10	0.379634	NA	NA	NA	NA
HcayUM158.g3	-0.000372	-0.25	0.767	-0.94	-0.977		0	0.0773816	0.0756226	NA	NA	NA	NA
HcayUM202.g4	-0.00284	0.659	0.0379	6.85e-05	0.992		0	6.25e-10	0.416833	NA	NA	NA	NA
HcayUM209.g15	-0.000492	-0.32	-0.568	-0.912	-0.969		0	2.98e-65	0.801239	NA	NA	NA	NA
Hcay201001o.g298	0.479	0.000169	0.928	0.909	0.665		0	2.97e-06	0.184255	NA	NA	NA	NA
Hcay203003o.g260	0.983	0.00842	0.645	-0.331	-0.944		0	7.84e-24	0.647582	TGOLN2	Golgi to endosome transport	knrl	9.6
Hcay206001o.g853	0.793	-0.00928	-0.858	0.909	0.51		0	1.86e-16	0.370676	XPNPEP1	Creatinase/Prolidase N-terminal domain	ApepP	5.56e-161
Hcay207001o.g702	0.945	-0.000112	0.946	-0.803	-0.905		0	0.0174439	0.120513	NA	NA	CG31533	0.096
Hcay209001o.g212	0.968	-0.000724	-0.963	-0.967	0.99		0	3.38e-19	0.502649	SRPN12	SERine Proteinase INhibitors	Spn100A	3.45e-36
Hcay209001o.g387	0.885	3.88e-05	0.000624	NA	0.976		0	1.25e-22	0.616077	NA	NA	CG4250	0.047
Hcay210001o.g1008	-0.897	-4.17e-05	-1.81e-06	-0.685	0.842		0	2.5e-18	0.53703	-	-	HUWE1	2
Hcay210001o.g202	-0.944	-0.00107	-0.0693	0.894	0.971		0	1.2e-08	0.363871	EPHX1	Catalyzes juvenile hormone hydrolysis	Jheh1	4.18e-122
Hcay210001o.g53	0.011	0.00769	0.565	0.405	0.665		0	4.38e-35	0.710037	EPHX1	Catalyzes juvenile hormone hydrolysis	Jheh2	1.02e-122
Hcay211001o.g320	0.1	0.00168	-0.982	NA	0.923		0	0.00011638	0.199141	-	-	Dcr-1	4.8
Hcay214004o.g577	0.175	4.31e-05	0.989	0.365	-0.404		0	5.15e-52	0.795087	A2ML1	Alpha-macro-globulin thiol-ester bond-forming region	Tep2	9.19e-61
Hcay214004o.g70	-0.953	0.00843	-0.281	0.864	0.395		0	7.2e-18	0.551586	ITP	Crustacean CHH/MIH/GIH neurohormone family	ITP	1.52e-24
Hcay215003o.g688	0.998	4.21e-06	0.949	-0.57	0.814		0	2.18e-07	0.329777	-	heterophilic cell-cell adhesion via plasma membrane cell adhesion molecules	beat-Va	9.19e-29
Hcay218003o.g807	-0.917	0.000136	-0.988	0.912	0.0246		0	NA	NA	-	Enoyl-(Acyl carrier protein) reductase	CG11200	3.38e-14
Hcay218003o.g811	NA	-7.23e-05	-0.802	0.88	0.764		0	2.67e-08	0.368595	-	Enoyl-(Acyl carrier protein) reductase	CG11200	2.05e-10
Hcay219001o.g914	0.878	0.00787	0.0547	-0.881	-0.0698		0	2.53e-08	0.388398	CES5A	alpha/beta hydrolase fold	gas	4.29e-105
Hcay219001o.g931	-0.968	0.00542	0.972	0.000529	0.835		0	5.14e-12	0.448198	LARP7	Domain in the RNA-binding Lupus La protein; unknown function	Larp7	2.13e-68
Hcay219001o.g932	0.648	0.00685	0.971	0.000372	0.701		0	5.47e-12	0.478547	CYP4V2	cytochrome p450	Cyp4c3	1.4e-118
Hcay220003o.g341	NA	-3.97e-06	-0.958	NA	8.16e-06		0	0.0323156	0.0769145	NA	NA	NA	NA
Hcay220003o.g602	-0.922	-7.48e-05	-0.949	0.999	0.643		0	1.51e-26	0.621701	-	Glycosyltransferase family 28 C-terminal domain	Ugt36D1	1.85e-91
Hcay220003o.g713	0.965	-0.00116	0.226	0.882	0.957		0	NA	NA	TTC30B	Tetratricopeptide repeat	Ttc30	0
HcayUM006.g0	NA	0.00957	0.0315	0.73	-0.531		0	3.44e-22	0.639044	-	heterophilic cell-cell adhesion via plasma membrane cell adhesion molecules	beat-Vb	7.06e-06
HcayUM025.g0	0.241	0.000314	0.395	-0.371	0.183		0	8.26e-68	0.856023	-	heterophilic cell-cell adhesion via plasma membrane cell adhesion molecules	beat-Va	9.01e-17
HcayUM026.g2	-0.782	-0.00512	-0.405	-0.709	-0.363		0	1.15e-10	0.443883	NA	NA	NA	NA
HcayUM055.g11	-0.713	-0.000656	-0.274	-0.832	-0.873		0	4.22e-14	0.441182	-	Core histone H2A/H2B/H3/H4	His3:CG33866	6.58e-96
HcayUM162.g15	0.488	0.0096	0.116	-0.688	-0.373		0	1.54e-13	0.47408	NA	NA	NA	NA
HcayUM249.g2	NA	0.00155	0.625	-0.00127	-0.871		0	1.42e-14	0.636318	NA	NA	NA	NA
Hcay201001o.g1093	-0.932	-0.579	-6.46e-19	0.144	-0.966		0	1.27e-08	0.223373	NA	NA	NA	NA
Hcay201001o.g482	0.682	0.977	-0.00101	0.000335	-0.32		0	9.64e-05	0.357487	-	Cytochrome b5-like Heme/Steroid binding domain	CG6870	2.28e-30
Hcay201001o.g941	0.977	NA	0.00504	0.965	0.85		0	8.73e-42	0.729157	-	Histidine phosphatase superfamily (branch 2)	CG9449	5.16e-38
Hcay202001o.g84	0.326	0.946	-0.000746	0.678	0.979		0	1.98e-21	0.603601	CBP	EF hand	CBP	8.72e-81
Hcay203003o.g284	-0.988	-0.977	-0.00358	-0.00654	-0.00224		0	4.04e-21	0.534788	NA	NA	Atg14	1.3
Hcay204001o.g380	-0.919	0.93	-0.00928	-0.868	-0.852		0	4.71e-28	0.73382	ABRA	actin binding	CG3630	5.19e-47
Hcay205001o.g639	0.953	-0.126	0.00548	NA	0.8		0	0.00072721	0.128735	-	proline rich protein	CG17264	2.55e-63
Hcay206001o.g177	-0.0126	-0.761	-0.00018	-0.945	-0.628		0	1.49e-09	0.383745	NA	NA	NA	NA
Hcay206001o.g54	NA	-0.842	-0.00265	0.864	0.747		0	0.0121155	0.0998452	NA	NA	CG13607	1.9
Hcay206001o.g698	0.923	0.983	0.00913	0.938	0.755		0	3.29e-19	0.545622	-	Protein of unknown function (DUF3421)	CG10527	3.71e-11
Hcay207001o.g834	-0.569	0.971	-0.00413	0.788	-0.601		0	1.87e-10	0.433101	-	Ribonuclease H protein	CG18223	0.031
Hcay207001o.g855	-0.796	-0.849	-0.00218	-0.905	0.413		0	1.47e-99	0.869683	PAK1IP1	WD domain_ G-beta repeat	CG12608	5.78e-76
Hcay208001o.g228	0.948	0.666	0.00017	0.128	0.458		0	1.01e-16	0.591154	-	-	CG14253	0.000515
Hcay208001o.g443	NA	0.872	0.00489	0.916	0.573		0	0.00458072	0.0785689	-	Transposase protein	CG5966	0.24
Hcay210001o.g1007	-0.913	-0.027	-1.6e-05	-0.008	0.865		0	3.08e-30	0.600606	-	-	CG10527	1.58e-11
Hcay210001o.g1009	-0.92	-0.0973	-1.83e-07	-0.0301	0.714		0	7.73e-19	0.560696	-	-	Ns2	6.1
Hcay210001o.g1182	-0.268	0.984	-0.00613	0.718	-0.953		0	NA	3e-13	DNAJB5	DnaJ C terminal domain	CG5001	2.59e-168
Hcay210001o.g325	-0.0331	0.891	-0.00682	0.997	-0.817		0	3.03e-30	0.726347	-	MYND finger	CG13458	1.66e-86
Hcay211001o.g175	0.997	0.899	-1.79e-17	0.939	-0.533		0	6.3e-22	0.741943	SRPN19	Serpin (serine protease inhibitor)	Spn85F	2.18e-39
Hcay211001o.g636	-0.104	-0.857	-0.00039	-1	0.954		0	2.17e-13	0.517958	-	-	Chpf	0.73
Hcay213001o.g1032	0.774	-0.972	-0.00858	0.584	0.977		0	6.68e-17	0.712007	-	Cyclin-dependent kinase inhibitor	mira	0.000369
Hcay213001o.g110	NA	NA	-8.78e-06	0.874	NA		0	NA	NA	hsp70	MreB/Mbl protein	Hsp68	0
Hcay213001o.g617	0.763	0.89	-0.00452	-0.774	0.82		0	2.71e-81	0.868066	KIF18A	Kinesin motor_ catalytic domain. ATPase.	Klp67A	6.19e-148
Hcay214004o.g304	-0.5	-0.842	-6.1e-05	0.931	0.872		0	1.46e-08	0.315204	SPG21	Spastic paraplegia 21 (Autosomal recessive_ Mast syndrome)	CG5162	3.3
Hcay214004o.g381	NA	-0.17	-1.21e-12	0.983	0.145		0	1.22e-54	0.743789	NA	NA	NA	NA
Hcay214004o.g61	-0.0366	-0.708	-0.000203	1	-0.093		0	1.76e-06	0.320589	PPWD1	Cyclophilin type peptidyl-prolyl cis-trans isomerase/CLD	CG3511	0
Hcay214004o.g612	0.995	0.685	-0.000104	-0.716	-1		0	6.36e-07	0.375892	NA	NA	NA	NA
Hcay215003o.g542	-0.953	-0.239	-5.43e-05	0.0138	-0.989		0	NA	NA	PTGR1	N-terminal domain of oxidoreductase	CG16935	1.03e-05
Hcay217001o.g102	-0.976	-0.989	-6.22e-06	-0.157	-0.0104		0	6.64e-20	0.516882	NA	NA	Polr3A	8.8
Hcay217001o.g730	-0.908	-0.887	-5.86e-07	0.417	-0.936		0	1.17e-10	0.513603	-	Domain of unknown function (DUF4779)	CG32829	0.011
Hcay217001o.g931	-0.944	0.936	-0.000938	-0.989	-0.717		0	2.19e-25	0.622546	NA	NA	NA	NA
Hcay218003o.g145	-0.0441	-0.94	-0.00528	0.826	-0.168		0	2.84e-10	0.387543	NA	NA	NA	NA
Hcay218003o.g441	0.327	0.294	3.64e-05	-0.889	0.845		0	2.05e-22	0.65323	PLD4	PLD-like domain	Pld3	2.97e-122
Hcay218003o.g597	NA	-0.702	-0.00849	0.777	0.966		0	NA	0	HSP90AB1	Hsp90 protein	Hsp83	0
Hcay218003o.g709	NA	NA	-1.94e-06	0.676	NA		0	NA	NA	CRYAB	Hsp20/alpha crystallin family	l(2)efl	3.45e-35
Hcay221001o.g382	-0.514	0.997	6.41e-10	-0.281	-0.26		0	NA	0	NA	NA	NA	NA
Hcay221001o.g579	0.101	0.245	0.0096	-0.0901	0.996		0	8.69e-09	0.331167	NA	NA	NA	NA
Hcay221001o.g783	-0.188	0.912	0.00936	-0.953	-0.99		0	2.31e-45	0.762661	FHOD1	Formin Homology 2 Domain	Fhos	0
HcayUM048.g14	-0.198	0.03	1.13e-05	6.91e-09	-0.0438		0	8.57e-15	0.573526	NA	NA	NA	NA
HcayUM054.g0	-0.0196	-0.102	-0.000104	-0.991	0.635		0	4.29e-23	0.61581	NA	NA	NA	NA
HcayUM158.g0	-0.0591	-0.679	-0.00506	-0.744	-0.836		0	1.95e-30	0.656802	NA	NA	NA	NA
HcayUM172.g5	-0.12	0.214	0.000881	1.47e-18	0.71		0	7.71e-05	0.211941	-	Transposase protein	CG8613	5.9
HcayUM172.g6	-0.268	NA	4.02e-06	0.404	0.66		0	0.00871699	0.0924594	TTLL12	Tubulin-tyrosine ligase family	pre-mod(mdg4)-O	2.2
HcayUM191.g1	-0.258	NA	7.39e-05	0.374	0.307		0	0.00079499	0.179678	NA	NA	NA	NA
HcayUM191.g2	-0.0588	0.88	8.22e-06	0.898	0.551		0	1.16e-07	0.165745	TTLL12	Tubulin-tyrosine ligase family	Adck5	6.1
HcayUM191.g3	NA	0.0578	5.32e-22	0.928	0.946		0	5.58e-05	0.193453	NA	NA	NA	NA
HcayUM210.g20	-0.0759	0.0421	3.29e-05	0.0255	-0.0727		0	4.22e-22	0.651771	NA	NA	NA	NA
HcayUM212.g0	-0.811	0.83	6.3e-08	-0.393	0.82		0	1.23e-19	0.456427	-	RNase H	Rrp1	0.64
DYRK4	-0.982	NA	0.313	0.00603	-0.758		0	7.98e-16	0.592893	NA	NA	CG43333	3.14e-127
Hcay201001o.g120	0.81	0.938	-0.562	0.0054	0.991		0	3.15e-08	0.329035	BUD13	Pre-mRNA-splicing factor of RES complex	CG13625	9.02e-49
Hcay201001o.g236	0.917	1	0.373	-0.00778	-0.884		0	2.54e-35	0.654649	-	-	Nup358	2.1
Hcay201001o.g339	0.995	-0.928	NA	0.000891	0.977		0	1.68e-06	0.378212	-	Chitin binding Peritrophin-A domain	CG8192	1.14e-58
Hcay201001o.g714	-0.842	-0.935	0.907	0.00024	-0.636		0	3.56e-14	0.514004	Osi21	Protein of unknown function (DUF1676)	Osi21	1.41e-37
Hcay201001o.g949	0.415	-0.802	0.714	-0.00672	0.836		0	0.00108435	0.149566	-	-	SoYb	0.077
Hcay202001o.g223	-0.756	0.927	-0.976	0.00579	0.65		0	9.77e-12	0.461595	NA	NA	NA	NA
Hcay202001o.g512	0.967	0.591	0.626	0.000121	0.839		0	3.97e-15	0.50037	-	-	CG7137	4.5
Hcay203003o.g234	-0.681	0.988	0.478	-0.00872	-0.997		0	2.15e-05	0.209887	-	Nse1 non-SMC component of SMC5-6 complex	Nse1	2.34e-11
Hcay204001o.g122	0.989	-0.971	0.291	0.00764	0.975		0	2.45e-26	0.586544	NA	NA	NA	NA
Hcay204001o.g179	-0.832	0.918	0.81	-0.00749	-0.824		0	1.38e-11	0.436452	NA	NA	NA	NA
Hcay204001o.g263	0.953	0.933	-0.424	0.00802	0.987		0	1.33e-38	0.711435	GPKOW	G-patch domain	CG10324	4.07e-48
Hcay204001o.g525	-0.586	0.788	-0.969	-0.00031	-0.998		1	6.66e-83	0.836914	NA	NA	NA	NA
Hcay204001o.g65	-0.26	-0.559	0.671	0.000881	0.897		0	2.29e-12	0.433087	-	Alcohol dehydrogenase GroES-like domain	Sodh-2	9.36e-91
Hcay205001o.g24	0.296	-0.817	-0.919	0.00571	-0.977		0	3.86e-11	0.432303	DDIT4L	RTP801 C-terminal region	chrb	3.72e-19
Hcay205001o.g429	0.629	0.945	0.935	3.09e-05	-0.55		0	3.29e-55	0.778953	-	Zn_pept	CG3108	1.13e-132
Hcay206001o.g110	0.014	0.121	0.0271	7.86e-09	0.96		0	2.39e-25	0.609139	ZCWPW1	zinc ion binding	Spc105R	2.3
Hcay206001o.g151	0.0481	0.788	0.934	1.15e-08	0.964		0	3.04e-16	0.479752	ATP5B	ATP synthase alpha/beta family_ beta-barrel domain	CG15533	6.22e-66
Hcay206001o.g173	0.95	0.802	-0.976	1.6e-08	0.994		0	1.5e-31	0.680442	PGLYRP1	Ami_2	PGRP-SA	1.37e-56
Hcay206001o.g239	-0.791	0.899	0.0583	0.00326	0.677		0	3.98e-23	0.589185	-	KR domain	CG31548	1.15e-114
Hcay206001o.g265	-0.759	-0.992	0.652	-0.00369	0.919		0	8.61e-122	0.907388	-	Leucine-rich repeats_ typical (most populated) subfamily	CG42346	0
Hcay206001o.g408	-0.991	0.887	0.999	-0.00237	-0.994		0	7.63e-89	0.865892	XPNPEP2	C-terminal region of peptidase_M24	CG6225	7.08e-130
Hcay206001o.g410	-0.91	-0.71	0.893	-5.41e-07	-0.716		0	1.73e-14	0.469457	NA	NA	NA	NA
Hcay206001o.g504	-0.953	0.851	0.874	-0.00183	-0.868		0	8.58e-26	0.607139	GGPS1	Polyprenyl synthetase	qm	2.3e-169
Hcay206001o.g513	0.101	0.973	0.391	0.00638	0.267		0	0.00242885	0.20121	-	Spaetzle	spz	0.006
Hcay206001o.g514	0.473	0.838	0.707	0.00853	-0.991		0	1.06e-08	0.335281	-	Lipase	CG18258	2.8e-38
Hcay206001o.g515	-0.978	-0.892	-0.951	0.00119	-0.878		0	3.03e-10	0.352949	-	-	CG14257	4.3e-17
Hcay206001o.g862	0.959	0.829	0.632	0.00013	0.92		0	2.1e-07	0.29093	-	Zinc-dependent metalloprotease	CG15254	1.4e-09
Hcay207001o.g179	0.994	-0.945	0.786	0.000156	-0.998		0	9.96e-07	0.337816	PRSS41	Belongs to the peptidase S1 family	CG8172	0
Hcay207001o.g23	-1	0.485	0.503	0.00353	0.931		0	2.08e-14	0.40437	-	-	CG12017	6.46e-24
Hcay207001o.g32	0.727	NA	-0.912	2.62e-05	-0.928		0	0.00014763	0.2927	-	Angiotensin-converting enzyme	Ance	2.65e-112
Hcay207001o.g489	-0.489	-0.459	-0.577	0.00623	-0.91		1	0	0.844533	-	-	CG32603	0.005
Hcay207001o.g683	-0.903	0.966	0.822	-0.000268	0.984		0	5.87e-53	0.784722	SLC9A8	Sodium/hydrogen exchanger family	Nhe1	0
Hcay207001o.g831	-0.753	-0.997	-0.782	-0.00176	-0.94		0	0.00021578	0.273678	-	Pyridoxal-phosphate dependent enzyme	Cbs	4.85e-36
Hcay207001o.g876	0.926	0.919	0.681	0.000696	-0.678		0	8.44e-24	0.568925	-	-	CG31248	9.98e-46
Hcay208001o.g107	-0.944	-0.972	0.31	0.00405	0.942		0	NA	2.05e-16	-	cytoplasmic mRNA processing body assembly	CG33108	7.8e-55
Hcay208001o.g108	-0.807	-0.974	0.915	0.00678	-0.971		0	9.09e-65	0.809977	-	Alpha amylase_ catalytic domain	CD98hc	9.39e-62
Hcay208001o.g126	-0.919	0.939	-0.494	-0.00896	0.99		0	3.66e-133	0.894076	WARS	tRNA synthetases class I (W and Y)	TrpRS	0
Hcay208001o.g171	-0.788	-0.616	-0.924	-0.00129	0.784		0	5.47e-06	0.35639	UXT	Prefoldin subunit	Uxt	1.08e-30
Hcay208001o.g188	-0.11	0.912	0.771	-0.000552	0.855		0	9.79e-132	0.885305	PCSK2	Belongs to the peptidase S8 family	amon	4.29e-25
Hcay208001o.g227	0.907	0.928	0.284	0.000107	0.976		0	1.29e-51	0.741784	-	Zinc finger_ C3HC4 type (RING finger)	Trc8	4.12e-11
Hcay208001o.g536	0.163	0.0151	0.776	3.58e-10	0.0059		0	9.69e-35	0.680789	-	Triabin	NLaz	1.49e-13
Hcay208001o.g580	-0.769	-0.593	-0.966	0.00161	0.526		0	1.45e-10	0.393508	CDKL1	Protein tyrosine kinase	CG7236	3.33e-173
Hcay208001o.g606	-0.999	0.0101	-0.967	-4.89e-16	-0.000821		0	8.36e-05	0.154437	RSPH4A	Radial spokehead-like protein	Rsph4a	6.54e-60
Hcay208001o.g64	0.273	-0.968	0.755	-0.00159	0.901		0	NA	NA	METTL15	MraW methylase family	CG46459	5.65e-22
Hcay208001o.g75	0.608	0.983	0.921	0.0017	0.877		0	1.29e-06	0.249801	-	Amino acid permease	hrg	6
Hcay209001o.g234	-0.888	0.988	0.622	0.00571	0.0574		0	1.14e-06	0.269208	NA	NA	HDAC4	8.4
Hcay209001o.g290	-0.7	-0.808	-0.685	-5.54e-05	-0.423		0	1.55e-62	0.800295	-	ZnF_C4 abd HLH domain containing kinases domain	CG13813	9.04e-26
Hcay209001o.g302	0.966	-0.975	0.13	-0.0059	0.928		0	1.36e-09	0.243561	-	SMP-30/Gluconolaconase/LRE-like region	smp-30	7.5e-37
Hcay209001o.g40	-0.601	-0.905	0.787	1.01e-05	0.966		0	0.00508858	0.124867	-	Protein of unknown function (DUF745)	CG11693	8.41e-28
Hcay209001o.g43	-0.928	0.957	-0.971	0.00146	-0.935		0	1.83e-295	0.95185	Wtrw	Ion transport protein	wtrw	0
Hcay209001o.g514	-0.786	-0.953	0.967	1.78e-10	-0.868		0	3.8e-36	0.683432	-	-	Dyro	4.81e-05
Hcay209001o.g76	-0.873	-0.935	0.735	0.00623	-0.85		0	2.42e-26	0.661893	mtg	Chitin binding Peritrophin-A domain	mtg	9.87e-87
Hcay210001o.g1071	0.757	0.858	0.193	5.62e-06	-0.553		0	7.85e-32	0.731754	-	ABC transporter	st	3.24e-114
Hcay210001o.g109	-0.66	-0.701	0.442	0.00263	0.538		0	4.66e-53	0.798994	PNPLA8	Patatin-like phospholipase	iPLA2-VIA	5.01e-28
Hcay210001o.g1114	-0.636	0.979	0.545	0.00677	-0.684		0	7.08e-15	0.634558	UBE2N	Ubiquitin-conjugating enzyme	ben	2.21e-102
Hcay210001o.g126	-0.958	0.823	0.989	-0.000609	-0.873		0	8.94e-36	0.730547	-	Zc3h12a-like Ribonuclease NYN domain	CG42360	7.3e-50
Hcay210001o.g363	0.95	0.736	0.972	0.00764	0.955		0	2.39e-27	0.679369	-	Trypsin-like serine protease	CG31326	2.55e-18
Hcay210001o.g530	0.991	0.745	-0.94	-0.0096	0.993		0	1.18e-44	0.770261	-	Aldose 1-epimerase	CG9008	5.15e-174
Hcay210001o.g576	-0.672	-0.617	-0.668	1.69e-09	0.756		0	5.63e-07	0.257526	LIG4	Belongs to the ATP-dependent DNA ligase family	DNAlig4	9.56e-105
Hcay210001o.g648	0.681	-0.783	0.808	0.00332	0.997		0	6.49e-42	0.655923	-	Lipase	CG6295	1.22e-64
Hcay210001o.g748	0.417	0.813	-0.65	0.00843	-0.533		0	6.59e-45	0.740262	smp-2	semaphorin domain	Sema1b	0
Hcay210001o.g961	-0.821	0.972	0.474	7.01e-07	-0.424		0	7.41e-21	0.561149	-	Domain of unknown function (DUF4773)	CG15239	5.76e-43
Hcay210001o.g979	0.236	0.961	-0.974	-3.97e-09	-0.929		0	1.73e-153	0.911743	ASAP1	ARF GTPase activator activity. It is involved in the biological process described with regulation of ARF GTPase activity	Asap	0
Hcay212001o.g31	-0.938	0.883	0.136	5.3e-05	0.497		0	1.7e-22	0.685485	TREX2	EXOIII	CG3165	1.56e-15
Hcay212001o.g41	-0.798	0.96	0.983	0.00851	0.637		0	1.28e-37	0.716042	-	Transmembrane transporter activity. It is involved in the biological process described with transmembrane transport	nebu	9.76e-58
Hcay212001o.g638	0.736	-0.967	0.185	0.00205	0.271		0	3.42e-09	0.363953	NA	NA	NA	NA
Hcay212001o.g68	0.638	0.793	0.94	0.000738	-0.479		0	6.5e-20	0.540338	-	Sugar (and other) transporter	CG6484	1.69e-44
Hcay213001o.g1048	-0.863	0.983	0.891	-0.00586	-0.979		0	4.68e-15	0.471663	TRPC1	Ion transport protein	trpl	2.96e-35
Hcay213001o.g1155	-0.852	0.837	0.784	0.00842	0.459		0	6.11e-30	0.644104	RFC2	DNA polymerase III_ delta subunit	RfC4	5.62e-160
Hcay213001o.g645	-0.694	-0.997	0.555	0.0033	0.926		0	NA	0	ARL8B	Gtr1/RagA G protein conserved region	CG12970	5.53e-22
Hcay213001o.g692	0.967	0.892	0.911	0.00988	0.903		0	4.7e-05	0.258149	-	Enoyl-(Acyl carrier protein) reductase	CG7675	2.18e-62
Hcay213001o.g935	0.976	-0.786	0.971	0.00557	-0.857		0	2.64e-12	0.420885	-	alpha/beta hydrolase fold	Lip4	4.25e-112
Hcay213001o.g972	0.989	NA	-0.0147	-0.0053	0.979		0	4.23e-15	0.482783	-	-	tsl	5.92e-63
Hcay214004o.g118	NA	0.226	0.936	0.000314	-0.786		0	2.24e-08	0.505101	NA	NA	NA	NA
Hcay214004o.g331	0.978	-0.978	0.976	-0.00638	0.992		0	1.68e-05	0.143239	NA	NA	CG10914	7.3
Hcay214004o.g349	0.976	0.971	0.887	0.000106	-0.983		0	NA	NA	-	-	sha	1.42e-70
Hcay214004o.g358	-0.0608	0.97	0.737	0.000708	0.752		0	3.37e-15	0.578739	CWF19L1	Protein similar to CwfJ C-terminus 2	CG7741	1.45e-133
Hcay215003o.g445	0.42	0.798	0.726	1.39e-05	-0.348		0	4.86e-43	0.649283	-	-	ect	2.42e-33
Hcay215003o.g654	0.759	-0.973	-0.149	0.00531	0.987		0	7.01e-06	0.505651	-	L-lysine 6-monooxygenase (NADPH-requiring)	Fmo-1	8.69e-129
Hcay215003o.g665	0.999	-0.925	-0.984	-0.00227	-0.98		0	0.00245544	0.192116	WDR16	WD domain_ G-beta repeat	CG10064	3.71e-137
Hcay216002o.g244	0.936	-0.727	0.936	0.00164	0.968		0	5.78e-10	0.392024	-	Glycosyltransferase family 28 C-terminal domain	Ugt36D1	9.97e-94
Hcay216002o.g265	-0.881	0.942	-0.85	0.00853	0.989		0	9.58e-185	0.925882	PSMC4	AAA domain (Cdc48 subfamily)	Rpt3	0
Hcay216002o.g351	0.909	0.986	0.5	0.000863	-0.878		0	2.06e-14	0.5489	-	DM4/DM12 family	CG4702	1.74e-120
Hcay216002o.g390	-0.849	-0.964	1	0.00948	-0.0246		0	1.94e-11	0.506478	-	-	CG14770	9.03e-18
Hcay216002o.g517	-0.949	0.362	0.912	0.00115	-0.552		0	8.28e-24	0.678803	NA	NA	NA	NA
Hcay216002o.g549	0.0699	-0.91	-0.969	-0.000646	-0.239		0	8.66e-18	0.501453	NA	NA	NA	NA
Hcay217001o.g1069	-0.887	0.344	-0.765	4.59e-05	0.995		0	3.78e-112	0.849862	-	Trypsin-like serine protease	CG5390	7.78e-68
Hcay217001o.g163	NA	0.955	NA	0.002	NA		0	0.0593857	0.10236	GBA	Glycosyl hydrolase family 30 TIM-barrel domain	Gba1b	9.79e-120
Hcay217001o.g348	0.76	0.959	0.84	-1.26e-05	0.886		0	1.15e-08	0.303692	NA	NA	CG30183	0.56
Hcay217001o.g65	0.942	-0.964	0.98	-0.000686	-0.882		0	1.09e-37	0.722945	-	Sulfatase	CG8646	0
Hcay217001o.g709	-0.934	0.909	1	0.00346	-0.998		0	4.62e-42	0.727871	-	Peptidase family M13	Nep1	1.49e-138
Hcay217001o.g836	-0.822	0.963	0.882	4.37e-05	-0.978		0	2.55e-49	0.751227	LDB2	LIM-domain binding protein	Chi	4.03e-180
Hcay217001o.g941	0.92	-0.977	0.982	4.12e-05	1		0	4.84e-28	0.624697	-	Gamma interferon inducible lysosomal thiol reductase (GILT)	GILT1	2.4e-39
Hcay218003o.g212	-0.858	-0.961	0.988	0.000525	-0.917		0	4.9e-18	0.41242	-	Structural constituent of cuticle	CG8927	1.38e-46
Hcay218003o.g291	-0.983	0.177	0.395	4.79e-06	-0.826		0	1.21e-18	0.666018	RNASEH2A	Endonuclease that specifically degrades the RNA of RNA- DNA hybrids	CG14570	6.35e-05
Hcay219001o.g127	-0.951	-0.944	0.235	0.000609	0.911		0	3.5e-08	0.392519	-	Protein of unknown function (DUF1676)	Osi24	7.81e-74
Hcay219001o.g139	0	0.625	0.548	2.19e-08	-0.469		0	7.31e-48	0.647484	Osi9	Protein of unknown function (DUF1676)	Osi9	1.25e-36
Hcay219001o.g143	0.912	NA	0.13	1.89e-05	-0.585		0	4.79e-14	0.516477	Osi9	Protein of unknown function (DUF1676)	Osi9	1.44e-25
Hcay219001o.g144	-1	0.851	0.789	0.00122	-0.175		0	4.81e-25	0.602625	Osi9	Protein of unknown function (DUF1676)	Osi9	1.78e-42
Hcay219001o.g160	-0.989	0.13	0.801	0.00184	-0.131		0	1.98e-51	0.704162	Osi18	Protein of unknown function (DUF1676)	Osi18	5.12e-47
Hcay219001o.g252	0.96	-0.929	-0.991	0.00773	0.911		0	NA	NA	-	-	imd	1.8
Hcay219001o.g254	-0.871	0.188	0.443	0.000144	-0.483		0	3.03e-38	0.651183	Osi19	Protein of unknown function (DUF1676)	Osi19	1.23e-66
Hcay219001o.g256	-0.991	0.408	0.896	8.48e-05	-0.833		0	1e-26	0.656251	Osi20	Protein of unknown function (DUF1676)	Osi20	5.81e-50
Hcay219001o.g381	0.859	-0.793	0.942	0.00581	0.708		0	2.92e-46	0.762897	TSPO	Translocator protein	Tspo	5.35e-45
Hcay219001o.g456	0.907	-0.925	0.456	0.00661	-0.961		0	6.11e-64	0.812721	TMEM87A	Lung seven transmembrane receptor	CG17660	7.11e-140
Hcay219001o.g538	-0.0826	-0.965	0.634	4.39e-22	-0.882		0	0.0001865	0.11662	UGT2A1	Glycosyltransferase family 28 C-terminal domain	Ugt36F1	2.56e-77
Hcay219001o.g793	-0.929	0.989	0.619	0.0017	0.985		0	2.86e-13	0.546501	-	-	CG13272	1.17e-12
Hcay219001o.g794	-0.831	NA	0.791	0.0037	0.887		0	1.62e-14	0.539796	-	-	CG13272	0.042
Hcay219001o.g85	0.0174	0.617	NA	-5.35e-05	-0.902		0	NA	0	-	Leucine rich repeat	f-cup	2.7e-12
Hcay219001o.g854	0.64	0.88	-0.939	1.42e-05	0.824		0	8.18e-48	0.76833	BANF1	Barrier to autointegration factor	baf	3.16e-46
Hcay219001o.g856	-0.993	-1	0.87	-0.000931	-0.324		0	6.61e-14	0.469839	-	Pfam:DUF3609	Ugt307A1	2.5
Hcay219001o.g881	0.934	0.719	0.955	4.34e-06	-0.792		0	NA	NA	-	-	apn	9.48e-16
Hcay219001o.g911	-0.861	-0.947	0.782	-0.00999	-0.969		0	4.92e-12	0.462425	NA	NA	Mtap	3.7
Hcay219001o.g963	-0.812	0.302	0.505	0.00425	0.575		0	1.73e-15	0.53419	ACY1	Peptidase family M20/M25/M40	CG17328	7.95e-63
Hcay220003o.g267	-0.644	-0.902	-0.984	1.02e-05	0.949		0	6.16e-05	0.130148	IFT20	Intraflagellar transport complex B_ subunit 20	IFT20	6.13e-11
Hcay220003o.g405	-0.531	0.94	-0.967	0.00199	-0.967		0	3.74e-91	0.846164	-	Amidohydrolase family	CG6106	1.36e-82
Hcay220003o.g446	-0.956	0.949	1	-0.002	-0.988		0	1.06e-32	0.759875	-	Fungal protease inhibitor	hyd	4.9
Hcay220003o.g621	0.976	0.974	0.972	0.00224	-0.903		0	3.29e-22	0.547659	wht-7	ABC-2 type transporter	w	0
Hcay220003o.g701	-0.994	-0.923	-0.671	0.00252	-0.928		0	3.75e-57	0.758933	MMP15	Matrixin	Mmp1	8.5e-69
Hcay220003o.g894	-0.577	0.49	0.932	-0.00311	0.877		0	2.67e-34	0.722582	MAPKAPK3	Lipopolysaccharide kinase (Kdo/WaaP) family	MAPk-Ak2	0
Hcay221001o.g137	0.146	0.912	-0.884	0.000268	-0.794		0	1.07e-26	0.592934	CYP303A1	Cytochrome P450	Cyp303a1	1e-163
Hcay221001o.g158	-0.768	-0.725	0.632	0.00139	0.985		0	2.56e-06	0.16905	HDHD3	HAD-hyrolase-like	Reg-2	1.01e-51
Hcay221001o.g449	0.936	0.887	0.292	-0.00503	-0.866		0	4.66e-105	0.880042	NA	NA	IKKepsilon	0.52
Hcay221001o.g465	0.896	-0.662	-0.951	0.000377	-0.964		0	1.81e-60	0.785679	-	7 transmembrane receptor (rhodopsin family)	Dop2R	0.00014
Hcay221001o.g54	0.836	0.907	-0.681	0.000665	-0.596		0	1.98e-46	0.763172	-	Transmembrane amino acid transporter protein	mah	6.54e-23
Hcay221001o.g558	0.941	0.373	-0.942	-0.00906	-0.986		0	4.97e-30	0.652946	NA	NA	Pgd	4.5
Hcay221001o.g574	-0.989	0.99	0.682	-0.00366	0.908		0	3.1e-84	0.847776	OGT	Glycosyl transferase family 41	sxc	0
Hcay221001o.g589	0.976	0.985	0.934	-0.000474	-0.925		0	3.75e-48	0.743561	DDAH1	dimethylaminohydrolase 1	CG1764	3.52e-73
Hcay221001o.g614	-0.194	-0.68	-0.804	-0.000481	0.976		0	1.89e-19	0.594892	-	-	CG9095	1.2
Hcay221001o.g642	-0.867	-0.929	-0.983	0.00115	-0.612		0	4.43e-05	0.319931	-	Domain of unknown function (DUF4816)	CG15919	9.8e-11
Hcay221001o.g736	0.958	0.908	0.132	0.00445	-0.974		0	5.14e-240	0.943189	NPDC1	Neural proliferation differentiation control-1 protein (NPDC1)	CG44247	6.41e-50
Hcay221001o.g94	-0.918	0.968	-0.181	-0.000322	-0.972		0	3.89e-29	0.652129	MAP3K13	Protein tyrosine kinase	wnd	2.6e-143
HcayUM062.g0	-0.816	0.535	0.0246	0.00194	0.953		0	4.25e-14	0.522664	NA	NA	NA	NA
HcayUM065.g2	NA	0.716	0.106	-0.00387	NA		0	0.0004362	0.160377	NA	NA	NA	NA
HcayUM066.g3	0.668	0.781	0.963	-0.000642	-0.981		0	1.02e-10	0.34642	NA	NA	NA	NA
HcayUM124.g0	-0.158	-0.801	-0.729	-0.00044	-0.211		0	1.31e-14	0.531826	-	von Willebrand factor (vWF) type D domain	CG34188	3.5
HcayUM138.g3	0.93	0.838	NA	-0.00685	-0.153		0	0.0001372	0.266296	NA	NA	NA	NA
HcayUM139.g3	-0.781	-0.726	0.996	-1.95e-05	-0.0581		0	6.7e-07	0.271708	-	von Willebrand factor (vWF) type D domain	CG3430	2.5
HcayUM141.g4	-0.0576	0.762	0.132	0.000238	0.99		0	1.4e-09	0.406553	NA	NA	NA	NA
HcayUM154.g1	-0.878	0.0252	0.289	-9.61e-05	NA		0	2.51e-15	0.465758	NA	NA	NA	NA
HcayUM169.g10	-0.999	0.9	-0.918	0.00303	0.779		0	1.88e-17	0.573023	NA	NA	NA	NA
HcayUM169.g11	NA	-0.881	-0.653	0.000475	-0.93		0	2.33e-12	0.424105	NA	NA	NA	NA
HcayUM172.g2	NA	NA	-0.754	5.26e-07	0.489		0	1.08e-21	0.621152	NA	NA	NA	NA
HcayUM176.g1	-0.81	0.261	0.766	4.96e-10	0.12		0	5.81e-36	0.675233	NA	NA	NA	NA
HcayUM178.g10	-0.0356	0.42	-0.206	9.93e-06	0.682		0	0.00554409	0.0818991	NA	NA	NA	NA
HcayUM196.g11	0.182	0.986	NA	-0.000308	0.964		0	1.13e-28	0.567629	NA	NA	NA	NA
HcayUM197.g7	-0.998	-0.979	0.763	0.00196	0.547		0	9.22e-18	0.608074	NA	NA	NA	NA
HcayUM199.g1	NA	0.0172	0.17	7.49e-06	-0.927		0	4.08e-12	0.431287	NA	NA	NA	NA
HcayUM203.g1	0.941	0.986	-0.25	-5.05e-15	0.798		0	9.67e-51	0.717335	NA	NA	NA	NA
HcayUM209.g13	-0.168	0.246	0.04	7.12e-06	0.927		0	4.47e-12	0.487283	NA	NA	NA	NA
HcayUM210.g27	NA	0.138	0.863	-0.000138	0.995		0	1.91e-11	0.429719	NA	NA	NA	NA
Hcay201001o.g157	0.964	-0.932	-0.971	0.998	-0.00454		0	0.00022629	0.130941	-	-	CG17272	6.3
Hcay201001o.g570	-0.857	NA	NA	0.153	-0.004		0	0.00030498	0.270353	F13A1	Transglutaminase/protease-like homologues	Tg	1.38e-105
Hcay202001o.g648	-0.945	0.926	0.992	0.695	-0.00255		0	1.28e-71	0.825662	PPO3	Hemocyanin_ copper containing domain	PPO2	0
Hcay206001o.g546	0.986	NA	NA	0.199	-0.00709		0	0.00207474	0.175429	C6orf10	Chromosome 6 open reading frame 10	Vajk4	6.3e-57
Hcay206001o.g548	-0.953	-0.945	-0.958	0.087	-0.00253		0	1.58e-09	0.317332	-	-	Vajk4	4.16e-74
Hcay206001o.g876	0.637	-0.127	0.931	0.259	0.00306		0	4.55e-09	0.255699	NA	NA	NA	NA
Hcay206001o.g944	-0.979	-0.715	0.918	0.976	0.00643		0	1.11e-05	0.242036	-	PCNA-associated factor	CG42404	0.23
Hcay207001o.g814	0.865	-0.999	-0.95	0.723	0.00183		0	1.27e-15	0.514858	NA	NA	CG3704	9.6
Hcay208001o.g283	0.874	-0.947	-0.866	-0.838	-0.0042		0	0.001925	0.135071	NA	NA	NA	NA
Hcay208001o.g597	1	NA	0.698	0.791	-0.00764		0	4.57e-09	0.498732	-	-	CG33299	1.26e-33
Hcay210001o.g707	0.978	0.949	-0.92	-0.591	0.0074		0	2.58e-37	0.682512	-	Endoribonuclease XendoU	CG2145	3.02e-52
Hcay212001o.g376	0.676	-0.852	-0.75	0.241	-0.0032		0	2.64e-77	0.847272	LCT	Belongs to the glycosyl hydrolase 1 family	CG9701	3.27e-132
Hcay213001o.g195	-0.428	0.962	0.685	0.272	0.000996		0	6.2e-20	0.488048	NA	NA	NA	NA
Hcay215003o.g373	0.648	-0.911	0.933	-0.925	0.000993		0	4.76e-68	0.821051	-	Elongation complex protein 6	poly	6.72e-13
Hcay216002o.g400	-0.982	NA	NA	0.639	-0.00947		0	3.01e-06	0.309483	-	-	CG12299	7.3
Hcay219001o.g140	-0.947	-0.92	0.755	0.548	-0.000611		0	4.94e-37	0.717678	-	Protein of unknown function (DUF1676)	Osi9	8.43e-17
Hcay201001o.g995	-0.857	0.803	0.979	-0.819	0.945		1	4.73e-95	0.86932	GLG1	Cysteine rich repeat	Glg1	0
Hcay202001o.g102	-0.845	-0.929	0.863	0.546	-0.958		1	4.36e-81	0.847665	-	toll-like receptor 7 signaling pathway	CG3078	1.6e-38
Hcay202001o.g430	-0.986	0.952	-0.0388	-0.301	0.933		1	2.32e-62	0.821806	SHCBP1	SHC SH2 domain-binding protein	nesd	1.98e-37
Hcay202001o.g489	0.899	0.997	-0.981	0.88	0.972		1	8.38e-115	0.897884	UFD1L	Ubiquitin fusion degradation protein UFD1	Ufd1	6.81e-107
Hcay203003o.g576	-0.103	-0.995	0.755	0.639	-0.888		1	2.11e-136	0.890165	-	Eukaryotic-type carbonic anhydrase	CAH7	6.69e-31
Hcay204001o.g454	-0.234	-0.951	0.924	0.897	-0.991		1	3.04e-145	0.913419	-	Immunoglobulin	DIP-gamma	1.82e-130
Hcay204001o.g456	0.728	-0.598	-0.113	-0.842	0.862		1	1.13e-74	0.827096	NA	NA	CG42307	2.7
Hcay205001o.g171	0.799	0.803	0.902	-0.33	-0.839		1	7.75e-102	0.871125	GSTCD	Methyltransferase domain	CG10428	2.94e-131
Hcay205001o.g278	-0.0234	-0.753	0.634	-0.839	0.737		1	0	0.957575	-	-	Nplp1	2.54e-09
Hcay205001o.g33	-0.507	-0.83	0.942	0.646	-0.308		1	2.89e-79	0.853325	NME6	NDK	nmdyn-D6	2.82e-46
Hcay206001o.g911	0.883	0.892	0.936	-0.103	-0.906		1	7e-96	0.861713	UAP1	UTP--glucose-1-phosphate uridylyltransferase	mmy	0
Hcay206001o.g912	0.969	-0.972	0.997	-0.828	0.313		1	1.31e-83	0.853539	REXO4	Exonuclease	CG6833	1.4e-68
Hcay206001o.g921	0.983	-0.764	-0.996	0.92	-0.969		1	2.14e-54	0.80261	MOCS3	Rhodanese Homology Domain	Uba4	1.17e-129
Hcay207001o.g1039	-0.49	-0.964	0.936	0.69	-0.989		1	4.82e-98	0.885043	PSMA6	The proteasome is a multicatalytic proteinase complex which is characterized by its ability to cleave peptides with Arg_ Phe_ Tyr_ Leu_ and Glu adjacent to the leaving group at neutral or slightly basic pH	Prosalpha1	8.84e-125
Hcay207001o.g293	-0.921	0.961	-0.989	-0.101	0.459		1	6.86e-55	0.817295	B3GALT1	Galactosyltransferase	GalT1	4.65e-43
Hcay207001o.g727	NA	NA	-0.874	-0.0843	-0.568		1	6.46e-61	0.811928	-	-	CG13069	6.8e-05
Hcay207001o.g750	-0.878	-1	0.903	0.831	-0.991		1	6.84e-241	0.809741	-	-	CG13044	0.047
Hcay207001o.g828	-0.983	-0.752	-0.918	0.379	-0.991		1	3.62e-71	0.82859	CES5A	alpha/beta hydrolase fold	CG10175	3.25e-110
Hcay207001o.g843	-0.978	0.853	-0.883	0.859	-0.576		1	1.27e-85	0.85531	NA	NA	NA	NA
Hcay208001o.g407	-0.971	-0.861	-0.968	-0.672	-0.985		1	1.09e-75	0.824571	-	Nuclear transport factor 2 (NTF2) domain	Nxt1	6.86e-40
Hcay208001o.g583	-0.154	0.249	0.979	0.718	0.176		1	1.96e-157	0.913067	IFT46	Intraflagellar transport complex B protein 46 C terminal	tacc	8e-24
Hcay209001o.g309	0.319	0.801	-0.861	-0.46	0.638		1	2.68e-90	0.866043	aurB	Protein tyrosine kinase	aurB	1.43e-125
Hcay209001o.g436	-0.898	0.656	0.643	-0.06	-0.984		1	3.39e-114	0.887503	-	It is involved in the biological process described with metabolic process	Naam	1.93e-180
Hcay209001o.g467	-0.513	0.666	-0.99	0.945	0.95		1	3.54e-132	0.899375	BZW2	eIF4-gamma/eIF5/eIF2-epsilon	kra	0
Hcay210001o.g1051	-0.939	0.997	0.945	-0.201	0.727		1	1.83e-142	0.900714	Phm	Copper type II ascorbate-dependent monooxygenase_ N-terminal domain	Phm	1.15e-126
Hcay210001o.g1139	0.807	0.903	-0.989	0.211	-0.491		1	2.51e-107	0.88125	RPN2	Oligosaccharyltransferase subunit Ribophorin II	OstDelta	1.7e-111
Hcay210001o.g198	-0.144	-0.986	0.988	0.504	0.913		1	7.44e-120	0.894213	exu	Ensures the proper localization of the mRNA of the bicoid gene to the anterior regions of the oocyte thus playing a fundamental role in the establishment of the polarity of the oocyte. May bind the bcd mRNA	exu	3.25e-55
Hcay210001o.g973	0.662	0.754	0.77	-0.907	-0.902		1	1.54e-117	0.877124	-	Sodium:solute symporter family	CG9657	5.75e-98
Hcay211001o.g241	0.994	-0.913	0.971	-0.278	-0.837		1	1.2e-65	0.809868	SPRYD7	SPRY domain	CG7785	3.55e-71
Hcay211001o.g384	-0.499	-0.272	0.981	0.158	-0.24		1	9.25e-146	0.90424	MGST1	MAPEG family	Mgstl	3.49e-26
Hcay211001o.g628	0.943	-0.527	-0.97	0.598	0.953		1	3.68e-84	0.849998	PPP6C	Protein phosphatase 2A homologues_ catalytic domain.	PpV	8.48e-179
Hcay212001o.g150	0.414	0.998	0.918	0.538	-0.642		1	1.35e-87	0.826375	-	CRAL/TRIO_ N-terminal domain	CG10657	4.27e-122
Hcay212001o.g379	0.92	0.95	0.98	-0.958	-0.515		1	1.37e-54	0.805741	LCT	Glycosyl hydrolase family 1	CG9701	7.65e-99
Hcay212001o.g438	-0.862	-0.92	-0.762	-0.689	-0.989		1	1.97e-111	0.880635	NOP9	Pumilio-like repeats	CG11123	8.73e-139
Hcay212001o.g587	0.945	0.98	0.878	-0.999	0.887		1	1.67e-115	0.88759	C1GALT1	Transferase activity_ transferring glycosyl groups	C1GalTA	7e-139
Hcay212001o.g809	0.897	-0.98	0.872	0.486	-0.912		1	3.67e-88	0.855585	SSR3	Translocon-associated protein_ gamma subunit (TRAP-gamma)	CG5885	9.99e-81
Hcay213001o.g141	-0.618	0.636	0.651	0.89	0.972		1	1.74e-179	0.925585	PLAA	Phospholipase A-2-activating	Plap	0
Hcay213001o.g52	-0.63	0.25	-0.539	-0.238	0.998		1	7.28e-60	0.811573	-	Animal haem peroxidase	Pxd	1.03e-75
Hcay213001o.g668	0.79	0.91	0.155	-0.575	-0.957		1	2.09e-193	0.906421	-	GNS1/SUR4 family	bond	6.18e-73
Hcay213001o.g764	-0.747	0.833	0.96	-0.988	-0.974		1	1.65e-114	0.893545	TMEM33	Uncharacterised protein family (UPF0121)	Kr-h2	1.15e-78
Hcay213001o.g845	0.912	-0.824	0.877	-0.841	0.965		1	1.46e-121	0.889146	HDAC11	Histone deacetylase domain	HDAC11	1.71e-116
Hcay214004o.g206	-0.643	0.525	0.85	0.948	-0.97		1	2.56e-132	0.902956	FKBP8	FKBP-type peptidyl-prolyl cis-trans isomerase	zda	6.15e-67
Hcay214004o.g243	-0.921	0.657	0.943	-0.345	-0.42		1	1.4e-94	0.869157	-	Major Facilitator Superfamily	CG30344	1.6e-82
Hcay214004o.g455	1	0.932	-0.929	-0.995	-0.827		1	3.95e-134	0.892747	NA	NA	NA	NA
Hcay214004o.g466	-0.165	-0.848	-0.788	-0.787	0.978		1	1.97e-107	0.87171	-	norepinephrine secretion	CG8726	8.31e-120
Hcay214004o.g481	0.632	0.84	-0.998	0.676	-0.815		1	3.34e-207	0.93415	USP14	Ubiquitin carboxyl-terminal hydrolase	Usp14	0
Hcay214004o.g515	0.339	0.836	-0.694	-0.884	-0.989		1	4.48e-191	0.931476	FEM1B	Ankyrin repeat	Fem-1	3.05e-156
Hcay214004o.g527	0.202	0.924	0.943	0.0933	-0.729		1	1.94e-62	0.832218	OLFML2B	Olfactomedin-like domains	CG6867	0
Hcay214004o.g589	0.711	0.971	0.542	0.0135	-1		1	2.46e-94	0.85611	ACAA2	Thiolase_ N-terminal domain	yip2	1.17e-160
Hcay214004o.g85	0.903	-0.987	0.915	-0.905	-0.291		1	7.21e-92	0.823326	-	Leucine-rich repeats_ typical (most populated) subfamily	conv	5.74e-46
Hcay215003o.g218	0.876	-0.69	-0.686	-0.98	-0.976		1	1.06e-119	0.888762	NA	NA	CG14448	2.5
Hcay215003o.g468	-0.514	-0.714	-0.756	-0.692	0.59		1	7.01e-88	0.86374	-	Zinc-finger associated domain (zf-AD)	CG11902	5.8e-29
Hcay215003o.g617	0.631	-0.943	0.958	0.836	-0.855		1	3.04e-141	0.904906	TTYH2	Protein tweety homolog	tty	5e-129
Hcay216002o.g463	0.78	0.945	-0.93	0.882	-0.972		1	2.82e-79	0.823937	-	Aldehyde oxidase and xanthine dehydrogenase_ a/b hammerhead domain	AOX3	0
Hcay216002o.g468	-0.947	0.945	-0.889	-0.957	-0.216		1	9.5e-96	0.860973	PC	Conserved carboxylase domain	PCB	0
Hcay217001o.g590	1	0.788	0.946	-0.716	-0.995		1	5.33e-63	0.838295	-	Cytochrome P450	Cyp12a5	3.21e-88
Hcay217001o.g917	0.0481	-0.692	-0.513	-0.5	-0.823		1	4.05e-107	0.857454	-	-	Dys	1
Hcay217001o.g997	-0.255	0.928	0.595	0.81	-0.871		1	6.66e-72	0.834197	KCNIP1	Calcium ion binding	CG5890	2e-126
Hcay218003o.g178	-0.929	-0.81	0.599	0.925	0.984		1	0	0.83146	-	-	CG32603	1.54e-21
Hcay218003o.g179	-0.819	NA	-0.948	0.851	0.945		1	0	0.838504	-	-	CG32603	2.14e-14
Hcay218003o.g184	NA	0	0	0.986	NA		1	0	0.943567	NA	NA	CG30203	0.51
Hcay218003o.g493	-0.981	-0.91	0.848	NA	-0.73		1	7.76e-45	0.801461	KRT76	structural molecule activity	CG9029	0.018
Hcay219001o.g494	0.0248	0.959	-0.982	0.952	0.961		1	4.86e-69	0.805338	-	GMC oxidoreductase	CG6142	9.7e-98
Hcay219001o.g974	-0.967	-0.693	-0.188	-0.845	-0.71		1	2.34e-177	0.914509	-	Sugar (and other) transporter	Tret1-2	1.64e-98
Hcay220003o.g498	-0.4	0.907	-0.864	0.318	-0.932		1	1.07e-113	0.887392	IDH1	Belongs to the isocitrate and isopropylmalate dehydrogenases family	Idh	0
Hcay220003o.g624	0.67	0.971	0.995	-0.977	-0.758		1	1.46e-95	0.865864	NSUN5	16S rRNA methyltransferase RsmB/F	Nsun5	9.01e-22
Hcay221001o.g319	-0.981	-0.564	-0.926	-0.955	-0.773		1	3.03e-149	0.902774	UCHL5	Ubiquitin carboxyl-terminal hydrolase_ family 1	Uch-L5	3.88e-64
Hcay221001o.g32	0.695	0.714	-0.727	0.856	-0.632		1	2.4e-105	0.886929	PHYHD1	Phytanoyl-CoA dioxygenase (PhyH)	Phyhd1	2.04e-125
Hcay221001o.g36	0.971	0.985	0.798	0.387	-0.532		1	2.3e-110	0.885249	-	Transmembrane amino acid transporter protein	CG7888	4.06e-135
Hcay221001o.g434	0.33	0.826	-0.836	0.377	-0.552		1	6.08e-76	0.834161	NA	NA	CG7884	0.8
Hcay221001o.g450	0.941	0.698	0.552	-0.833	0.975		1	2.94e-117	0.882992	NA	NA	SvilD	0.037
Hcay221001o.g486	-0.117	-0.942	0.849	0.952	0.816		1	1.13e-189	0.922684	ARHGAP1	It is involved in the biological process described with signal transduction	RhoGAP68F	2.86e-94
