# Supplementary material for: Genetic, developmental, and neural changes underlying the evolution of butterfly mate preference
Source: PLoS Biol. 2025 Mar 11;23(3):e3002989. doi: 10.1371/journal.pbio.3002989 (PMC12136153; doi:10.1371/journal.pbio.3002989)
Supplement: S7 Table — Global FDR (gFDR) values for DESeq2 were calculated using all p-values from all DESeq2 analyses for all tissues using the Benjamini–Hochberg method. gFDRs are shown for each stage-specific comparison. maSigPro model fit p-values and R-squared values are shown. The top blastp hits to the Drosophila melanogaster r6.44 proteome are shown. (XLSX) [file pbio.3002989.s019.xlsx]

## Sheet: table S7 - Retina DEGs
table S7. Differentially expressed genes between yellow and white Heliconius cydno alithea male retinas. Global FDR (gFDR) values for DESeq2 were calculated using all p-values from all DESeq2 analyses for all tissues using the Benjamini-Hochberg method. gFDRs are shown for each stage-specific comparison. maSigPro model fit p-values and R-squared values are shown. The top blastp hits to the Drosop…
	DESeq2						maSigPro
Gene	p2 gFDR	p4 gFDR	p6 gFDR	p7 gFDR	Adult gFDR		Significant	p-value	R-squared	eggNOG Name	eggNOG Description	Dmel Gene	Dmel E-value
Hcay201001o.g1003	-0.00025	-0.181	NA	-0.928	0.998		0	NA	0	-	FK506 binding	shu	7.42e-13
Hcay201001o.g1173	0.00908	0.243	NA	-0.325	-0.781		0	1.64e-13	0.562163	-	Cytochrome P450	Cyp6a2	7.98e-98
Hcay201001o.g161	1.02e-07	-0.937	NA	0.169	-0.833		0	2.49e-07	0.37087	RYR2	Ryanodine-sensitive calcium-release channel activity.	RyR	0
Hcay201001o.g262	4.71e-05	-0.383	NA	0.968	0.971		0	5.56e-36	0.744914	-	-	pip	1.6
Hcay201001o.g433	5.35e-09	0.845	NA	-0.974	-0.993		0	4.67e-17	0.636148	SETD2	associated with SET domains	Set2	2.95e-130
Hcay201001o.g446	-0.000887	0.883	NA	0.978	-0.902		0	NA	1.94e-16	HYDIN	axonemal central apparatus assembly	CG12728	0.55
Hcay201001o.g679	4.12e-05	0.0169	NA	0.00886	-0.496		0	1.31e-31	0.628127	-	-	svr	0.76
Hcay201001o.g728	-0.00623	-0.863	NA	-0.816	-0.927		0	2.19e-171	0.903831	-	PPIases accelerate the folding of proteins. It catalyzes the cis-trans isomerization of proline imidic peptide bonds in oligopeptides	ninaA	9.62e-50
Hcay201001o.g910	0.000696	0.928	NA	-0.916	-0.642		0	7.2e-108	0.890911	MBNL2	zinc finger	mbl	2.25e-137
Hcay202001o.g192	-8.55e-21	0.398	NA	-0.935	-0.919		0	1.13e-25	0.693948	-	Aldo/keto reductase family	CG10638	2.05e-73
Hcay202001o.g221	0.000581	-0.791	NA	0.514	0.98		0	NA	NA	-	It is involved in the biological process described with	FASN3	0
Hcay202001o.g336	-6.28e-05	-0.777	NA	-0.815	-0.933		0	7.67e-13	0.494202	DNA2	PD-(D/E)XK nuclease superfamily	cin	9.26e-141
Hcay202001o.g360	-6.08e-05	-0.9	NA	0.907	0.997		0	1.74e-26	0.707016	C4orf29	Abhydrolase domain containing 18	CG32112	2.16e-158
Hcay202001o.g516	1.09e-05	5.35e-05	NA	0.0204	-0.886		0	8.24e-35	0.62177	NA	NA	NA	NA
Hcay204001o.g290	-0.00559	-0.565	NA	0.686	0.995		0	9.52e-38	0.741446	COG1	Vps51/Vps67	Cog1	5.85e-74
Hcay204001o.g316	-2.12e-06	0.809	NA	-0.92	0.947		0	1.53e-05	0.268648	-	TPR repeat	Stip1	1.56e-18
Hcay204001o.g454	0.00423	-0.94	NA	-0.981	0.933		0	NA	NA	-	Immunoglobulin	DIP-gamma	1.82e-130
Hcay204001o.g456	8.96e-08	-0.989	NA	-0.763	0.932		0	NA	2.06e-15	NA	NA	CG42307	2.7
Hcay204001o.g496	4.82e-15	-0.994	NA	0.993	0.966		0	1.18e-59	0.843327	TRMT1	N2_N2-dimethylguanosine tRNA methyltransferase	Trm1	0
Hcay204001o.g497	-0.00685	-0.971	NA	-0.862	0.971		0	3.05e-21	0.675833	LONP1	Found in ATP-dependent protease La (LON)	Lon	0
Hcay204001o.g57	0.000887	0.66	NA	-0.0026	-0.163		0	3.51e-15	0.659525	NA	NA	crb	1.5
Hcay205001o.g191	-0.00455	-0.995	NA	-0.987	-0.833		0	5.22e-07	0.34122	-	5'-nucleotidase_ C-terminal domain	veil	0
Hcay205001o.g576	-5.79e-06	-0.999	NA	0.717	-0.992		0	6.83e-10	0.565173	-	EF hand	Scp1	3.74e-85
Hcay206001o.g177	-2.33e-06	-0.655	NA	0.647	0.916		0	9.46e-09	0.421945	NA	NA	NA	NA
Hcay206001o.g20	-0.00144	-0.711	NA	0.978	-0.395		0	1.5e-06	0.286577	NA	NA	NA	NA
Hcay206001o.g36	0.00198	-0.923	NA	0.742	0.738		0	2.4e-14	0.494613	NA	NA	NA	NA
Hcay206001o.g416	-0.000376	0.797	NA	0.459	0.883		0	2.82e-09	0.521357	ERCC1	Binding domain of DNA repair protein Ercc1 (rad10/Swi10)	Ercc1	4.89e-90
Hcay206001o.g49	0.00117	0.0681	NA	0.451	0.805		0	1.36e-10	0.456259	BCKDHB	Transketolase_ C-terminal domain	CG17691	1.55e-133
Hcay206001o.g770	-0.00103	0.946	NA	-0.96	0.319		0	0.00027479	0.219504	-	Major royal jelly protein	yellow-f	3.03e-54
Hcay208001o.g235	-9.9e-07	-0.979	NA	-0.922	0.895		0	1.91e-34	0.689038	-	alpha/beta hydrolase fold	CG10175	4.48e-180
Hcay208001o.g244	0.00685	0.827	NA	-0.989	-0.899		0	NA	NA	-	Short calmodulin-binding motif containing conserved Ile and Gln residues.	CG14692	0.000485
Hcay208001o.g251	0.000263	0.343	NA	0.796	0.947		0	1.34e-62	0.838891	ARID4B	RNA binding activity-knot of a chromodomain	htk	4.04e-62
Hcay208001o.g632	-2.93e-13	0.945	NA	0.402	-0.839		0	3.99e-08	0.356745	NA	NA	CG3534	0.54
Hcay208001o.g657	-0.00468	-0.797	NA	-0.785	-0.823		0	NA	NA	CES5A	Carboxylesterase family	alpha-Est3	2.11e-31
Hcay209001o.g284	-2.9e-09	-0.777	NA	3.01e-10	0.967		0	9.43e-06	0.36818	aurB	Protein tyrosine kinase	aurB	1.31e-125
Hcay209001o.g310	0.00353	0.574	NA	0.86	-0.971		0	1.46e-12	0.563406	-	Rad51	spn-D	2.03e-31
Hcay209001o.g78	-1.6e-05	0.963	NA	-0.79	0.952		0	1.27e-37	0.805999	-	-	sls	3.3
Hcay210001o.g242	3.92e-06	0.626	NA	-0.463	-0.972		0	4.05e-09	0.421834	-	Hus1-like protein	Hus1-like	4.74e-51
Hcay210001o.g495	-0.00237	-0.942	NA	0.991	0.673		0	1.62e-27	0.639566	-	-	bi	9
Hcay210001o.g618	2.93e-11	-1	NA	0.64	0.448		0	3.02e-05	0.357112	InR	Furin-like cysteine rich region	InR	0
Hcay210001o.g662	0.00354	0.701	NA	0.979	-0.913		0	2.06e-26	0.688517	PPIF	PPIases accelerate the folding of proteins. It catalyzes the cis-trans isomerization of proline imidic peptide bonds in oligopeptides	Cyp1	1.13e-91
Hcay210001o.g83	0.00531	0.932	NA	-0.984	0.885		0	1.42e-31	0.727423	MED20	TATA-binding related factor (TRF) of subunit 20 of Mediator complex	MED20	1.72e-80
Hcay211001o.g240	3.8e-16	-0.975	NA	-0.961	-0.984		0	5.29e-76	0.851594	-	C-type lectin (CTL) or carbohydrate-recognition domain (CRD)	CG4115	2.64e-122
Hcay211001o.g249	-0.00827	-0.158	NA	-0.905	-0.997		0	3.33e-32	0.74438	SETMAR	SET (Su(var)3-9_ Enhancer-of-zeste_ Trithorax) domain	CG4565	1.04e-52
Hcay211001o.g266	-9.32e-05	-0.0784	NA	-0.955	0.982		0	4.85e-38	0.799288	NA	NA	NA	NA
Hcay211001o.g789	-0.000521	0.587	NA	0.949	0.864		0	0.0009844	0.223867	-	Myb/SANT-like DNA-binding domain	CG32813	0.06
Hcay212001o.g547	0.000125	0.958	NA	0.963	0.855		0	9.02e-15	0.620205	unc-54	Belongs to the TRAFAC class myosin-kinesin ATPase superfamily. Myosin family	Mhc	0
Hcay212001o.g639	0.00272	0.894	NA	0.575	0.79		0	1.79e-15	0.555226	-	Cyclic nucleotide-monophosphate binding domain	sei	2.48e-08
Hcay212001o.g792	-3.05e-06	-0.31	NA	-0.981	-0.669		0	1.14e-17	0.598225	ppil6	Cyclophilin type peptidyl-prolyl cis-trans isomerase/CLD	Tep2	0.89
Hcay213001o.g51	0.00199	0.249	NA	0.953	-0.999		0	1.8e-92	0.881582	UNC5C	It is involved in the biological process described with signal transduction	unc-5	8.04e-79
Hcay214004o.g175	0.00511	0.791	NA	-0.611	0.933		0	4.93e-98	0.897447	NDUFS4	ETC complex I subunit conserved region	ND-18	1.61e-63
Hcay214004o.g190	-0.009	-0.515	NA	0.987	-0.863		0	2.41e-19	0.652632	NEURL2	Neuralized	CG3894	3.37e-91
Hcay214004o.g469	0.00105	0.437	NA	-0.998	-0.928		0	7.41e-05	0.278039	RIC1	RIC1	Rich	0
Hcay215003o.g297	-0.0012	-0.98	NA	-0.953	-1		0	1.47e-41	0.789742	MBOAT7	MBOAT_ membrane-bound O-acyltransferase family	frj	4.18e-101
Hcay215003o.g376	0.00397	NA	NA	NA	0.513		0	1.24e-08	0.473364	NA	NA	NA	NA
Hcay215003o.g662	-0.000679	0.994	NA	0.732	0.918		0	1.66e-14	0.53076	NA	NA	NA	NA
Hcay216002o.g217	0.00216	0.0548	NA	0.4	0.884		0	2.78e-39	0.751732	NA	NA	NA	NA
Hcay216002o.g232	-1.97e-11	0.999	NA	-0.962	-0.998		0	1.55e-57	0.791306	-	-	CG14431	1.27e-06
Hcay216002o.g239	0.00717	0.932	NA	0.000107	0.786		0	NA	NA	NA	NA	CG31029	0.036
Hcay216002o.g90	-5.31e-10	-0.259	NA	0.929	-0.945		0	6.99e-16	0.584307	-	Leucine-rich repeats_ typical (most populated) subfamily	Con	2.86e-62
Hcay217001o.g268	0.00601	0.717	NA	0.829	0.964		0	8.9e-07	0.393263	-	-	rtv	1.62e-47
Hcay217001o.g270	-0.00122	-0.894	NA	0.761	0.86		0	2.93e-56	0.823656	NUP50	NUP50 (Nucleoporin 50 kDa)	Nup50	4.9e-49
Hcay217001o.g643	-0.000881	0.712	NA	-0.927	0.572		0	5.37e-39	0.826238	-	N-terminal domain in C. elegans NRF-6 (Nose Resistant to Fluoxetine-4) and NDG-4 (resistant to nordihydroguaiaretic acid-4).	drd	6e-102
Hcay217001o.g677	0.00113	0.903	NA	-0.662	0.945		0	1.09e-41	0.711322	-	Transmembrane amino acid transporter protein	CG8785	7.51e-139
Hcay217001o.g840	-0.00572	0.999	NA	0.76	-1		0	4.48e-23	0.701107	-	DNA/RNA non-specific endonuclease	CG6839	4.92e-57
Hcay217001o.g841	0.00144	0.916	NA	0.87	0.966		0	5.28e-09	0.474958	CCDC132	Vacuolar-sorting protein 54_ of GARP complex	Vps50	3.43e-150
Hcay218003o.g22	0.00284	0.87	NA	-0.595	0.152		0	1.15e-06	0.485107	-	-	Obp58b	1.05e-06
Hcay218003o.g458	-1.47e-08	0.953	NA	-0.893	0.987		0	4.02e-64	0.871382	ALDH18A1	Amino acid kinase family	P5CS	0
Hcay219001o.g734	0.000221	0.869	NA	-0.926	0.923		0	9.72e-16	0.568202	-	-	CG13532	4.72e-21
Hcay220003o.g445	-8.07e-15	-0.958	NA	0.762	0.116		0	7.26e-21	0.608212	SOAT1	MBOAT_ membrane-bound O-acyltransferase family	CG8112	1.37e-68
Hcay220003o.g845	0.00571	0.00705	NA	-0.93	0.849		0	2.21e-14	0.60248	-	chlorophyllide a oxygenase [overall] activity	CG32436	0.000105
Hcay220003o.g846	-0.00609	-0.953	NA	-0.977	0.474		0	5.34e-26	0.691975	NA	NA	PPP1R15	6.1
Hcay220003o.g9	-0.00787	0.0516	NA	0.843	0.958		0	5.76e-14	0.524338	jhamt	juvenile hormone acid methyltransferase activity	jhamt	7.52e-46
Hcay221001o.g31	-3.08e-05	-0.999	NA	-0.998	0.371		0	7.52e-14	0.554392	NA	NA	NA	NA
Hcay221001o.g500	0.00685	0.929	NA	-0.999	0.77		0	3.83e-19	0.54336	KCNT2	Calcium-activated BK potassium channel alpha subunit	SLO2	1.36e-93
Hcay221001o.g582	9.67e-05	0.257	NA	0.958	0.938		0	8.48e-17	0.580822	NA	NA	NA	NA
Hcay221001o.g649	-0.00146	-0.0143	NA	0.855	-0.905		0	4.14e-14	0.569411	-	Zinc-finger of C2H2 type	crol	1.07e-33
Hcay221001o.g668	0.000767	0.241	NA	-0.287	-0.996		0	2.73e-11	0.542687	-	-	Glt	3.8
Hcay221001o.g757	-0.00803	-0.856	NA	-0.505	-0.711		0	2.22e-68	0.855208	UBE2K	Ubiquitin associated domain	Ubc4	9.46e-103
HcayUM003.g2	-3.16e-09	0.923	NA	0.632	0.945		0	3.37e-09	0.402741	NA	NA	NA	NA
HcayUM020.g15	-4.95e-20	-0.247	NA	0.802	-0.987		0	4.99e-11	0.441801	NA	NA	NA	NA
HcayUM054.g0	-0.00126	-0.0401	NA	-0.94	-0.989		0	5.16e-26	0.722675	NA	NA	NA	NA
HcayUM091.g20	0.00138	0.922	NA	0.0155	0.942		0	5.79e-22	0.669201	NA	NA	NA	NA
HcayUM091.g27	0.00659	0.926	NA	0.78	-0.819		0	7.65e-11	0.534349	NA	NA	NA	NA
HcayUM097.g1	-3.79e-05	-0.703	NA	0.0882	-0.998		0	8.24e-07	0.411495	NA	NA	NA	NA
HcayUM100.g0	6.41e-24	5.1e-08	NA	3.07e-07	0.982		0	3.74e-31	0.679132	UBE2K	Ubiquitin associated domain	Ubc4	1.54e-89
HcayUM104.g19	-5.3e-05	-0.736	NA	0.286	-0.832		0	1.53e-13	0.565998	NA	NA	NA	NA
HcayUM122.g15	-0.00287	-0.81	NA	0.911	0.985		0	1.44e-08	0.434641	NA	NA	NA	NA
HcayUM172.g2	-5.1e-08	3.98e-11	NA	0.799	-0.996		0	1.98e-12	0.479635	NA	NA	NA	NA
HcayUM185.g5	-5.51e-05	-0.287	NA	0.761	-0.934		0	0.00040543	0.186889	NA	NA	NA	NA
HcayUM191.g3	0.000292	8.38e-11	NA	0.889	0.949		0	1.15e-06	0.427317	NA	NA	NA	NA
HcayUM220.g5	-2.63e-07	-0.899	NA	0.193	0.586		0	6.62e-07	0.359413	NA	NA	NA	NA
Hcay201001o.g1093	-0.981	-3.24e-05	NA	0	NA		0	1.5e-05	0.289732	NA	NA	NA	NA
Hcay201001o.g1204	-0.989	-0.00985	NA	0.927	-0.77		0	2.18e-33	0.788938	Ces3	Carboxylesterase family	Nlg3	1.8e-126
Hcay202001o.g433	0.523	0.000676	NA	0.965	0.891		0	3.3e-08	0.472884	-	AMP-binding enzyme C-terminal domain	CG17999	5.84e-54
Hcay202001o.g438	0.917	8.79e-05	NA	-0.911	0.151		0	1.39e-106	0.898842	FABP5	lipid binding	fabp	1.14e-29
Hcay202001o.g547	0.776	-1.42e-05	NA	-0.873	-0.877		0	5.7e-08	0.471339	-	It is involved in the biological process described with	FASN3	0
Hcay204001o.g488	NA	0.00277	NA	-0.986	0.996		0	NA	8.16e-16	NA	NA	NA	NA
Hcay207001o.g730	-0.975	0.00182	NA	-0.903	-0.864		1	5.72e-203	0.934614	-	-	CG13678	0.015
Hcay208001o.g207	NA	0.000301	NA	-0.0445	NA		0	5.09e-17	0.502829	-	Belongs to the peptidase S1 family	ea	1.82e-55
Hcay209001o.g387	0.322	2.44e-05	NA	6.7e-08	0.946		0	2.07e-31	0.717653	NA	NA	CG4250	0.047
Hcay210001o.g1007	-0.947	-0.00531	NA	-0.611	-0.927		0	1.82e-29	0.627742	-	-	CG10527	1.58e-11
Hcay210001o.g1008	-0.947	-0.00245	NA	0.986	-0.653		0	2.23e-26	0.583136	-	-	HUWE1	2
Hcay210001o.g202	-0.873	-0.000281	NA	0.647	0.78		0	4.46e-09	0.411549	EPHX1	Catalyzes juvenile hormone hydrolysis	Jheh1	4.18e-122
Hcay210001o.g841	-0.42	-0.00947	NA	0.756	-0.977		0	7.05e-24	0.727577	MASTL	Protein tyrosine kinase	gwl	3.94e-101
Hcay211001o.g675	0.921	0.00144	NA	0.814	-0.958		0	3.76e-43	0.788803	NA	NA	Sap-r	4.1
Hcay212001o.g322	0.202	0.00501	NA	-0.927	-1		0	1.75e-05	0.281716	-	Pacifastin inhibitor (LCMII)	Vha100-3	5.1
Hcay212001o.g440	-0.0241	-4.58e-05	NA	-0.816	0.929		0	2.19e-33	0.739181	-	Lipase	CG5665	6.11e-43
Hcay213001o.g1101	0.926	2.73e-05	NA	-0.977	NA		0	0.00063794	0.183653	-	Carboxypeptidase activation peptide	CG18417	1.82e-89
Hcay213001o.g164	-0.833	-0.0016	NA	-0.789	-0.915		0	3.29e-20	0.650707	-	WD domain_ G-beta repeat	CG30116	0
Hcay213001o.g332	0.604	9.32e-05	NA	-0.974	0.898		0	2.99e-07	0.350446	PFAS	AIR synthase related protein_ C-terminal domain	Pfas	0
Hcay213001o.g577	-1	0.000963	NA	-0.985	0.856		0	3.85e-13	0.547577	NPSR1	Vasopressin receptor activity. It is involved in the biological process described with G-protein coupled receptor signaling pathway	CCAP-R	9.23e-128
Hcay213001o.g888	-0.914	-0.000951	NA	-0.235	0.99		0	2.09e-08	0.456655	-	-	Meltrin	0.47
Hcay216002o.g445	NA	0.000873	NA	-0.95	-0.965		0	NA	0	NA	NA	cn	5.5
Hcay216002o.g602	-0.27	0.00164	NA	0.876	0.96		0	NA	0	-	-	CG10311	0.031
Hcay217001o.g107	0.0121	-5.62e-06	NA	-0.938	-0.997		0	NA	0	NA	NA	Ino80	1.3
Hcay218003o.g841	0.118	1.57e-06	NA	0.432	0.928		0	1.07e-114	0.910397	-	-	Ir60a	2.9
Hcay221001o.g424	-0.788	0.00136	NA	0.935	-0.751		0	8.21e-06	0.369807	KIFC1	Microtubule binding	ncd	1.22e-98
Hcay221001o.g425	NA	-0.00609	NA	0.988	-0.483		0	3.31e-18	0.538695	KIFC1	Microtubule binding	ncd	0.003
HcayUM073.g1	-0.891	-0.00613	NA	0.902	-0.88		0	1.88e-10	0.4567	NA	NA	NA	NA
HcayUM169.g1	-0.66	-1.89e-05	NA	-0.937	-0.973		0	6.57e-29	0.669366	NA	NA	NA	NA
HcayUM169.g11	-0.105	-0.00947	NA	0.0988	-0.929		0	4.9e-13	0.396611	NA	NA	NA	NA
Hcay201001o.g296	0.957	-0.784	NA	-6.95e-05	-0.716		0	2.18e-23	0.663619	-	Immunoglobulin	tei	6.06e-58
Hcay202001o.g224	0.239	0.864	NA	-1.68e-06	NA		0	1.54e-05	0.392562	NA	NA	NA	NA
Hcay202001o.g407	-0.504	-0.977	NA	0.000632	0.976		0	2.12e-26	0.6633	-	-	RASSF8	6.2
Hcay203003o.g150	-0.154	-0.634	NA	-0.000277	0.223		0	2.25e-24	0.718749	NA	NA	NA	NA
Hcay204001o.g164	0.929	0.96	NA	3.23e-05	-0.991		0	1.32e-06	0.583171	-	Insect cuticle protein	Cpr30F	1.13e-25
Hcay204001o.g165	0.901	NA	NA	0.00896	0.661		0	8.25e-21	0.67674	-	Insect cuticle protein	Cpr30F	1.52e-25
Hcay205001o.g605	0.933	-0.915	NA	5.76e-13	-0.507		0	6.43e-13	0.59194	-	methyltransferase activity	Smyd4-4	7.6e-23
Hcay206001o.g7	-0.974	-0.438	NA	-3.99e-07	0.602		0	0.00090305	0.287835	NA	NA	NA	NA
Hcay206001o.g823	0.884	-0.865	NA	4.89e-49	-1		0	3.7e-14	0.582072	-	-	CG17691	0.24
Hcay206001o.g922	0.936	-0.945	NA	0.00141	0.981		0	1.07e-57	0.860644	DICER1	Belongs to the helicase family. Dicer subfamily	Dcr-1	0
Hcay207001o.g144	-0.838	-0.879	NA	-0.000972	-0.315		0	1.28e-24	0.731797	NA	NA	NA	NA
Hcay207001o.g340	-0.985	-0.966	NA	0.00715	0.976		0	0.00793322	0.119017	NA	NA	CG30183	0.56
Hcay207001o.g819	-0.869	0.731	NA	-0.00551	0.966		0	7.36e-54	0.863642	GADL1	Beta-eliminating lyase	b	0
Hcay207001o.g998	-0.981	0.944	NA	0.00762	0.822		0	4.97e-08	0.398735	TSNAX	Translin family	Trax	1.69e-54
Hcay208001o.g302	0.152	-0.982	NA	0.000895	0.938		0	2.14e-14	0.43815	C17orf49	SANT SWI3_ ADA2_ N-CoR and TFIIIB'' DNA-binding domains	CG33695	2.12e-21
Hcay208001o.g379	0.742	0.517	NA	1.31e-06	0.255		0	2.43e-13	0.5156	POLA2	May play an essential role at the early stage of chromosomal DNA replication by coupling the polymerase alpha primase complex to the cellular replication machinery	PolA2	8.56e-64
Hcay210001o.g1083	NA	-0.35	NA	-0.00614	0.673		0	1.3e-10	0.486814	ACOX2	Acyl-coenzyme A oxidase N-terminal	ACOX1	0
Hcay210001o.g1098	0.654	0.503	NA	-0.000121	-0.498		0	1.18e-25	0.725335	NA	NA	NA	NA
Hcay210001o.g1130	0.734	-0.997	NA	-3e-08	-0.978		0	7.05e-73	0.874225	GSAP	gamma-Secretase-activating protein C-term	pigeon	0
Hcay210001o.g444	-0.572	0.95	NA	-0.00086	-0.467		0	7.18e-90	0.901966	SLC30A2	Cation efflux family	ZnT35C	1.06e-134
Hcay211001o.g369	-0.924	-0.897	NA	1.55e-12	0.892		0	5.45e-19	0.483187	ZCCHC24	Zinc-binding domain	CG12446	2.7
Hcay211001o.g384	-0.248	-0.864	NA	-3.46e-05	0.986		0	6.91e-32	0.807981	MGST1	MAPEG family	Mgstl	3.49e-26
Hcay212001o.g473	-0.999	-0.862	NA	-0.000762	-0.996		0	8.73e-20	0.566625	-	Papain family cysteine protease	26-29-p	5.95e-86
Hcay212001o.g638	0.942	-0.527	NA	0.00714	0.346		0	1.16e-13	0.428333	NA	NA	NA	NA
Hcay213001o.g386	0.924	0.0402	NA	-2.66e-06	0.994		0	3.93e-19	0.613354	-	Insect cuticle protein	Cpr49Aa	2.55e-28
Hcay213001o.g5	NA	0.0561	NA	3.09e-11	-0.921		0	2.04e-23	0.58723	-	Reverse transcriptase (RNA-dependent DNA polymerase)	fwd	0.13
Hcay213001o.g622	-0.937	-0.876	NA	-6.11e-07	NA		0	1.25e-17	0.555766	NA	NA	NA	NA
Hcay213001o.g644	0.87	0.946	NA	0.00819	-0.779		0	2.06e-09	0.437768	-	Mab-21	CG30424	3.63e-26
Hcay213001o.g645	0.937	0.882	NA	0.0053	-0.0506		0	2.64e-09	0.503641	ARL8B	Gtr1/RagA G protein conserved region	CG12970	5.53e-22
Hcay213001o.g974	-0.918	-0.893	NA	0.000782	0.462		0	3.71e-07	0.319629	NA	NA	Mlp60A	0.069
Hcay214004o.g512	-0.0583	-0.996	NA	-0.00559	-0.658		0	4.98e-11	0.538867	-	Carboxylesterase family	CG10175	1.7e-54
Hcay215003o.g84	0.451	NA	NA	-0.00986	-0.877		0	8.42e-27	0.765946	-	Trehalase	Treh	7.19e-155
Hcay218003o.g441	0.084	0.417	NA	0.00125	0.978		0	3.85e-20	0.656378	PLD4	PLD-like domain	Pld3	2.97e-122
Hcay219001o.g15	-0.853	-0.941	NA	0.00099	0.448		0	3.29e-39	0.717339	-	It is involved in the biological process described with cellular response to stress	CG11498	6.28e-163
Hcay219001o.g275	-0.972	-0.832	NA	0.000186	-0.931		0	2.81e-09	0.339997	-	Homologues of snake disintegrins	Meltrin	8.6e-175
Hcay219001o.g538	-0.059	-0.944	NA	4.17e-05	-0.92		0	NA	NA	UGT2A1	Glycosyltransferase family 28 C-terminal domain	Ugt36F1	2.56e-77
Hcay219001o.g85	0.0314	NA	NA	-1.47e-08	0.974		0	4.15e-05	0.365017	-	Leucine rich repeat	f-cup	2.7e-12
Hcay219001o.g888	0.989	0.258	NA	-0.000339	-0.0665		0	0.00332497	0.227417	NMUR1	Serpentine type 7TM GPCR chemoreceptor Srsx	PK2-R1	5.19e-119
Hcay220003o.g922	-0.953	-0.809	NA	-0.000115	0.849		0	1.61e-20	0.544864	-	Catalyzes the reduction of fatty acyl-CoA to fatty alcohols	CG4020	9.72e-136
Hcay221001o.g207	0.939	0.747	NA	-0.000862	-0.98		0	4.3e-107	0.885188	pgp-2	ABC transporter transmembrane region	Mdr49	0
Hcay221001o.g382	-0.155	-0.764	NA	-1.02e-25	-0.595		0	1.52e-38	0.737245	NA	NA	NA	NA
Hcay221001o.g745	-0.909	-0.164	NA	0.00624	0.98		0	NA	NA	NA	NA	NA	NA
Hcay221001o.g86	0.46	-0.668	NA	-3.76e-05	-0.625		0	6.38e-20	0.694318	PDPR	Tryptophan halogenase	CG3626	0
HcayUM006.g5	-0.856	-0.772	NA	0.00613	0.174		0	3e-41	0.746527	NA	NA	NA	NA
HcayUM048.g14	-0.928	0.409	NA	0.000562	-0.394		0	0.00055762	0.188608	NA	NA	NA	NA
HcayUM062.g0	0.418	0.207	NA	0.0017	0.511		0	1.4e-16	0.618228	NA	NA	NA	NA
HcayUM065.g2	-0.427	0.939	NA	-1.39e-05	NA		0	0.00109185	0.148987	NA	NA	NA	NA
HcayUM072.g5	-0.997	NA	NA	0.00718	-0.249		0	0.0576618	0.0821846	NA	NA	NA	NA
HcayUM098.g0	-0.0792	-0.379	NA	-0.00891	-0.961		0	9e-07	0.30235	-	Reverse transcriptase (RNA-dependent DNA polymerase)	Trm1	0.83
HcayUM117.g7	-0.921	-0.526	NA	0.00788	0.964		0	4.17e-10	0.501147	NA	NA	NA	NA
HcayUM141.g6	0.955	-0.97	NA	0.000365	0.661		0	4.12e-47	0.717921	NA	NA	NA	NA
HcayUM197.g7	0.839	-0.851	NA	0.00189	0.876		0	3.13e-36	0.766215	NA	NA	NA	NA
HcayUM209.g13	0.906	0.0832	NA	0.00112	0.261		0	2e-13	0.547825	NA	NA	NA	NA
HcayUM210.g1	0.605	-0.753	NA	3.04e-08	0.201		0	1.42e-45	0.799142	-	Ribonuclease H protein	CG3430	5.9
HcayUM216.g6	-0.979	-0.424	NA	4.97e-05	0.628		0	3.29e-09	0.519524	NA	NA	NA	NA
HcayUM218.g15	0.594	-0.937	NA	-0.000375	0.144		0	1.05e-15	0.633916	NA	NA	NA	NA
HcayUM218.g25	0.997	0.96	NA	1.4e-06	0.458		0	7.97e-43	0.727976	NA	NA	NA	NA
HcayUM240.g4	NA	-0.885	NA	0.000558	-0.895		0	0.00408173	0.112001	His4r	Histone H4	His4:CG33909	3.47e-68
Hcay204001o.g471	-0.798	0.898	NA	-0.801	0.00781		0	2.44e-17	0.599292	-	Sugar (and other) transporter	CG7458	3.67e-107
Hcay207001o.g111	-0.648	0.845	NA	-0.992	0.00165		0	0	0.837452	-	Cuticle protein CPCFC	CG8736	4.04e-07
Hcay208001o.g264	-0.937	0.642	NA	0.942	-8.52e-06		0	0.0129571	0.125272	-	-	CG12496	1.1
Hcay208001o.g283	0.964	0.965	NA	0.922	-0.00764		0	5.04e-21	0.681634	NA	NA	NA	NA
Hcay212001o.g32	-0.887	0.313	NA	0.997	0.00719		0	0.00063497	0.234857	TREX2	EXOIII	CG3165	7.19e-25
Hcay212001o.g368	0.989	0.43	NA	NA	0.000887		0	4.32e-26	0.662107	LCT	Glycosyl hydrolase family 1	CG9701	5.97e-97
Hcay212001o.g418	-0.459	0.946	NA	0.977	-0.0014		0	4.75e-59	0.828209	-	Tubulin is the major constituent of microtubules. It binds two moles of GTP_ one at an exchangeable site on the beta chain and one at a non-exchangeable site on the alpha chain	betaTub60D	0
Hcay212001o.g798	-0.826	-0.989	NA	0.921	0.00401		0	3.4e-09	0.394196	bli-3	Animal haem peroxidase	Duox	0
Hcay214004o.g290	-0.811	NA	NA	-0.682	1.26e-06		0	3.48e-42	0.80495	CSP3	Insect pheromone-binding family_ A10/OS-D	EbpIII	2.39e-34
Hcay214004o.g635	-0.972	0.926	NA	-0.989	0.000125		0	2.14e-108	0.863973	-	Transmembrane transporter activity. It is involved in the biological process described with transmembrane transport	CG7458	8.74e-35
Hcay214004o.g636	-0.984	-0.918	NA	-0.924	0.00885		0	4.33e-106	0.895398	-	Transmembrane transporter activity. It is involved in the biological process described with transmembrane transport	SLC22A	7.66e-62
Hcay215003o.g356	0.995	-0.872	NA	0.467	0.00516		0	5.86e-30	0.749171	Y-h	Major royal jelly protein	yellow-h	8.88e-113
Hcay217001o.g102	NA	0.996	NA	0.753	-0.000422		0	1.34e-06	0.395699	NA	NA	Polr3A	8.8
Hcay217001o.g298	-0.966	0.826	NA	NA	0.00069		0	1.03e-94	0.87319	-	Cytochrome P450	Cyp4g15	0
Hcay217001o.g822	0.809	0.502	NA	0.984	0.000318		0	8.14e-97	0.853795	-	Insect cuticle protein	Cpr100A	1.5e-10
Hcay218003o.g660	0.894	0.961	NA	-0.926	0.00086		0	1.26e-23	0.657914	NA	NA	wb	0.72
Hcay220003o.g826	-0.771	0.945	NA	-0.901	0.00138		0	1.25e-07	0.500861	-	Male sterility protein	wat	3.9e-141
Hcay221001o.g608	NA	NA	NA	-0.954	1.71e-05		0	NA	NA	TH	Biopterin-dependent aromatic amino acid hydroxylase	ple	0
HcayUM210.g20	-0.936	0.0374	NA	-0.989	-0.00239		0	3.99e-08	0.405251	NA	NA	NA	NA
eepd1	-0.879	0.869	NA	-0.965	-0.893		1	1.94e-65	0.852683	NA	NA	CG31156	0.002
Hcay201001o.g140	0.981	0.415	NA	0.464	-0.915		1	1.14e-85	0.868704	KIRREL	Irregular chiasm C-roughest	rst	0
Hcay201001o.g194	0.604	NA	NA	-0.688	0.693		1	1.01e-65	0.866195	NA	NA	NA	NA
Hcay201001o.g337	0.918	0.667	NA	-0.826	0.939		1	4.92e-134	0.921217	TBC1D20	Rab GTPase activator activity. It is involved in the biological process described with regulation of Rab GTPase activity	CG17883	2.49e-107
Hcay201001o.g475	0.537	-0.992	NA	0.824	-0.962		1	1.39e-186	0.936369	TOP1	DNA Topoisomerase I (eukaryota)	Top1	0
Hcay201001o.g493	0.261	-0.978	NA	-0.857	0.938		1	1.51e-75	0.870698	FAM73B	Mitoguardin	Miga	2.2e-158
Hcay201001o.g625	0.995	0.67	NA	0.613	0.953		1	8.84e-183	0.934726	NGDN	Sas10/Utp3/C1D family	CG11030	1.63e-98
Hcay201001o.g74	-0.697	-0.679	NA	0.966	-0.794		1	8.6e-217	0.944958	-	7 transmembrane receptor (Secretin family)	stan	7.86e-05
Hcay202001o.g344	0.914	-0.944	NA	0.945	0.201		1	4.06e-46	0.807563	CBX1	Chromo Shadow Domain	HP1b	1.58e-64
Hcay202001o.g355	0.941	0.966	NA	0.857	-0.26		1	5.08e-66	0.859966	SGSM2	RUN	CG1695	0
Hcay202001o.g642	-0.781	NA	NA	0.411	0.997		1	4.52e-40	0.810805	-	-	CG15258	0.11
Hcay203003o.g315	-0.695	-0.944	NA	-0.695	0.915		1	3.59e-55	0.838948	-	-	CG32436	5.52e-53
Hcay203003o.g44	-0.775	-0.912	NA	0.523	-1		1	2.84e-116	0.910797	-	extracellular matrix	CG31195	0
Hcay203003o.g452	0.865	0.942	NA	-0.844	-0.874		1	3.02e-65	0.837458	ZFAND6	Zinc ion binding	CG45050	2.38e-65
Hcay203003o.g536	-0.66	-0.984	NA	0.41	-0.764		1	1.43e-101	0.88053	PPCS	DNA / pantothenate metabolism flavoprotein	Ppcs	1.29e-159
Hcay204001o.g2	-0.678	-0.82	NA	-0.983	0.557		1	1.1e-78	0.873342	-	Cytochrome P450	Cyp6a2	6.56e-99
Hcay204001o.g241	0.433	0.972	NA	-0.728	-0.189		1	1.42e-119	0.91003	DENND4B	Domain always found downstream of DENN domain_ found in a variety of signalling proteins	Crag	0
Hcay204001o.g286	-0.204	-0.56	NA	0.999	-0.427		1	7.35e-120	0.909012	KCNN2	Small conductance calcium-activated potassium channel	SK	0
Hcay204001o.g304	0.966	-0.994	NA	0.905	0.539		1	1.7e-63	0.829729	MFAP1	Microfibril-associated/Pre-mRNA processing	Mfap1	8.32e-127
Hcay204001o.g355	-0.898	0.648	NA	0.865	-0.697		1	1.95e-114	0.909316	ATP8B2	Belongs to the cation transport ATPase (P-type) (TC 3.A.3) family. Type IV subfamily	ATP8B	0
Hcay205001o.g33	-0.672	0.991	NA	-0.974	-0.508		1	5.05e-78	0.882463	NME6	NDK	nmdyn-D6	2.82e-46
Hcay205001o.g357	-0.98	-0.956	NA	-0.917	0.883		1	8e-78	0.865184	ISCA2	Iron-sulphur cluster biosynthesis	CG13623	6.26e-43
Hcay205001o.g390	0.867	0.948	NA	0.984	-0.881		1	2.56e-55	0.817936	TRAPPC9	Transport protein Trs120 or TRAPPC9_ TRAPP II complex subunit	CG10631	8.12e-09
Hcay205001o.g506	-0.792	-0.897	NA	-0.648	-0.995		1	4.72e-144	0.919551	VDAC2	Eukaryotic porin	porin	6.34e-137
Hcay205001o.g94	-0.861	-0.864	NA	-0.882	-0.149		1	5.03e-164	0.926336	PGM1	Phosphoglucomutase/phosphomannomutase_ alpha/beta/alpha domain III	Pgm1	0
Hcay206001o.g248	0.928	0.601	NA	0.149	0.284		1	2.5e-106	0.902304	-	-	gukh	4.61e-118
Hcay206001o.g259	0.906	-0.745	NA	-0.0214	-1		1	3.34e-84	0.87694	PHYKPL	Aminotransferase class-III	CG8745	0
Hcay206001o.g71	0.716	0.968	NA	-0.625	0.976		1	1.22e-156	0.931976	SGPL1	carboxy-lyase activity. It is involved in the biological process described with carboxylic acid metabolic process	Sply	0
Hcay206001o.g746	-0.745	-0.877	NA	-0.774	0.846		1	0	0.967159	SLC25A44	Mitochondrial carrier protein	CG5805	5.78e-145
Hcay206001o.g921	-0.969	-0.677	NA	0.988	0.928		1	3.64e-68	0.860443	MOCS3	Rhodanese Homology Domain	Uba4	1.17e-129
Hcay206001o.g939	0.943	-0.573	NA	0.93	-0.721		1	1.25e-107	0.894591	-	zinc finger	CG5245	1.08e-44
Hcay206001o.g940	0.709	-0.89	NA	-0.955	-0.713		1	7.15e-75	0.85896	-	zinc finger	Blimp-1	0.000438
Hcay207001o.g103	0.97	-0.392	NA	0.424	-0.895		1	1.4e-69	0.862853	-	glycine rich nucleic binding domain	CG31301	0.001
Hcay207001o.g489	-0.837	0.0508	NA	-0.812	0.705		1	2.04e-57	0.822778	-	-	CG32603	0.005
Hcay207001o.g711	-0.886	-0.872	NA	0.409	-0.984		1	7.68e-62	0.845868	GPS1	26S proteasome subunit RPN7	CSN1b	0
Hcay207001o.g720	-0.982	NA	NA	-0.697	0.935		1	6.99e-123	0.908606	-	-	CG32603	0.001
Hcay207001o.g721	NA	NA	NA	-0.533	-0.981		1	2.34e-157	0.915223	-	-	CG32603	0.62
Hcay207001o.g722	0.928	NA	NA	-0.841	0.966		1	1.15e-154	0.915031	-	Neuropeptide-like 4B	CG13044	0.17
Hcay207001o.g724	0.985	NA	NA	-0.997	0.89		1	1.85e-213	0.913853	-	-	CG1368	0.000162
Hcay207001o.g725	-0.976	0.108	NA	0.286	-0.627		1	1.19e-68	0.842538	-	-	CG14095	5.7
Hcay207001o.g726	0.994	NA	NA	0.998	0.985		1	1.26e-110	0.896808	-	-	CG14096	4.62e-05
Hcay207001o.g727	-0.888	NA	NA	0.998	-0.899		1	1.46e-241	0.924389	-	-	CG13069	6.8e-05
Hcay207001o.g729	0.976	NA	NA	0.745	-0.958		1	3.59e-44	0.806517	-	-	CG13069	0.19
Hcay207001o.g802	-0.457	0.95	NA	-0.705	-0.852		1	6.79e-92	0.884472	cle-1	Structural molecule activity. It is involved in the biological process described with cell adhesion	Mp	2.24e-70
Hcay207001o.g855	0.924	-0.872	NA	0.969	0.443		1	1.17e-68	0.867094	PAK1IP1	WD domain_ G-beta repeat	CG12608	5.78e-76
Hcay207001o.g946	0.986	-0.974	NA	0.57	0.93		1	1.37e-135	0.915143	GORAB	positive regulation of smoothened signaling pathway involved in dorsal/ventral neural tube patterning	Gorab	4.97e-12
Hcay207001o.g984	0.37	-0.973	NA	0.143	0.907		1	1.68e-67	0.849579	Eg	c4 zinc finger in nuclear hormone receptors	eg	5.99e-66
Hcay208001o.g227	0.501	0.933	NA	0.989	-0.419		1	2.36e-135	0.917805	-	Zinc finger_ C3HC4 type (RING finger)	Trc8	4.12e-11
Hcay208001o.g377	0.969	-0.969	NA	-0.57	-0.952		1	3.5e-169	0.930698	-	MOSC domain	Marc	2.96e-58
Hcay208001o.g506	0.976	0.977	NA	0.699	0.469		1	4.16e-51	0.802837	GLE1	GLE1-like protein	Gle1	1.95e-71
Hcay208001o.g624	-0.429	-0.217	NA	0.989	-0.493		1	1.06e-78	0.864348	GFM2	Elongation factor Tu GTP binding domain	mRRF2	0
Hcay209001o.g176	-0.99	-0.829	NA	0.99	-0.836		1	0	0.970634	VAMP2	Synaptobrevin	nSyb	5.54e-57
Hcay209001o.g295	-0.714	-0.968	NA	-0.885	-0.727		1	2.17e-270	0.956245	ATP6V1E1	ATP synthase (E/31 kDa) subunit	Vha26	1.94e-118
Hcay210001o.g1066	0.703	0.936	NA	-0.856	-0.931		1	1.48e-96	0.887238	TSC22D2	TSC22 domain family	bun	1.6e-27
Hcay210001o.g212	0.969	-0.995	NA	0.962	0.483		1	6.65e-66	0.842054	MNAT1	CDK-activating kinase assembly factor MAT1	Mat1	7.51e-137
Hcay210001o.g304	0.807	-0.861	NA	0.528	-0.861		1	3.26e-65	0.845446	SMC5	AAA domain	SMC5	3.36e-66
Hcay210001o.g308	-0.903	0.927	NA	-0.933	0.683		1	3.48e-85	0.876072	CHMP4B	Snf7	shrb	5.62e-91
Hcay210001o.g381	0.81	-0.986	NA	-0.793	0.805		1	2.48e-135	0.929517	HYKK	Phosphotransferase enzyme family	CG31751	1.09e-108
Hcay210001o.g494	0.381	-0.87	NA	-0.873	-0.677		1	4.68e-88	0.873258	CHRAC1	Histone-like transcription factor (CBF/NF-Y) and archaeal histone	Chrac-16	4.49e-21
Hcay210001o.g615	0.934	0.961	NA	-0.929	-0.595		1	2.06e-70	0.85391	UBE3C	Domain Homologous to E6-AP Carboxyl Terminus with	CG3356	0
Hcay210001o.g640	1	-0.875	NA	1	0.208		1	4.34e-55	0.838736	-	-	CG15506	2.67e-08
Hcay210001o.g848	0.841	0.846	NA	-0.879	-0.994		1	1.06e-171	0.936267	IFI30	Gamma interferon inducible lysosomal thiol reductase (GILT)	CG41378	4.68e-32
Hcay210001o.g855	0.825	0.771	NA	-0.433	0.997		1	4.27e-99	0.897571	MYO3A	Myosin. Large ATPases.	Nuak	0.72
Hcay210001o.g856	0.742	0.902	NA	-0.725	0.962		1	4.11e-84	0.884706	MYO3A	Myosin. Large ATPases.	ninaC	0
Hcay212001o.g109	0.961	0.687	NA	0.996	0.962		1	7.78e-65	0.849645	PSMD9	Domain present in PSD-95_ Dlg_ and ZO-1/2.	CG9588	1.61e-48
Hcay212001o.g141	0.904	0.124	NA	0.854	0.904		1	6.56e-95	0.887633	-	MobA-like NTP transferase domain	CG8207	0
Hcay212001o.g281	0.995	-0.98	NA	0.934	-0.628		1	1.18e-66	0.856375	SACM1L	SacI homology domain	Sac1	7.37e-32
Hcay212001o.g327	-0.971	-0.568	NA	-0.921	0.9		1	5.02e-251	0.951821	GSS	Eukaryotic glutathione synthase_ ATP binding domain	Gss1	0
Hcay212001o.g404	-0.993	0.961	NA	0.951	-0.342		1	6.53e-102	0.896235	NPEPL1	Cytosol aminopeptidase family_ catalytic domain	grsm	0
Hcay213001o.g327	-0.898	0.824	NA	-0.64	0.82		1	4.73e-53	0.837534	TIMP3	Metalloendopeptidase inhibitor activity	Timp	6.63e-26
Hcay213001o.g358	0.951	-0.921	NA	-0.946	0.952		1	3.53e-54	0.832726	DUS4L	Dihydrouridine synthase (Dus)	CG10495	1.44e-85
Hcay213001o.g444	0.98	0.958	NA	0.929	0.0881		1	8.46e-53	0.823986	ZMAT2	Zinc-finger double-stranded RNA-binding	CG11586	3.88e-89
Hcay213001o.g525	0.922	-0.974	NA	0.327	0.406		1	6.72e-55	0.813183	-	Lipase	CG6847	0
Hcay213001o.g739	-0.172	-0.856	NA	0.435	0.995		1	2.01e-219	0.951496	RSPH3	Radial spoke protein 3	Rsph3	1.73e-64
Hcay213001o.g76	-0.758	-0.823	NA	0.819	0.984		1	6.46e-61	0.844333	EIF4E	Eukaryotic initiation factor 4E	eIF4E1	3e-81
Hcay213001o.g801	0.726	0.852	NA	0.937	-0.876		1	6.3e-93	0.889185	CORO7	DUF1900	pod1	0
Hcay214004o.g127	-0.942	-0.783	NA	-0.189	-0.995		1	2.25e-80	0.860844	-	Malate/L-lactate dehydrogenase	CG10512	8.77e-137
Hcay214004o.g145	0.92	-0.424	NA	0.745	-0.921		1	3.37e-111	0.913285	NA	NA	NA	NA
Hcay214004o.g224	0.557	-0.991	NA	0.655	-0.677		1	2.15e-192	0.941795	MDN1	Nuclear chaperone required for maturation and nuclear export of pre-60S ribosome subunits	CG13185	0
Hcay214004o.g371	-0.798	-0.972	NA	-0.694	0.987		1	0	0.965632	TMEM259	Tumour-associated protein	CG8405	7.41e-144
Hcay214004o.g455	0.979	0.953	NA	0.98	-0.936		1	1.22e-115	0.912539	NA	NA	NA	NA
Hcay214004o.g542	0.94	0.913	NA	0.515	0.834		1	1.55e-96	0.889812	-	HAUS augmin-like complex subunit 3	dgt3	0.00072
Hcay214004o.g580	0.445	-0.809	NA	0.921	0.998		1	1.43e-101	0.911483	-	-	RIC-3	5.13e-25
Hcay215003o.g139	0.308	-0.931	NA	-0.652	0.977		1	3.01e-169	0.930889	DFFB	CIDE-N domain	Drep4	7.16e-57
Hcay215003o.g460	-0.747	-0.476	NA	0.994	-0.854		1	2.41e-72	0.848436	PGS1	Phosphotransferase activity_ for other substituted phosphate groups. It is involved in the biological process described with phospholipid biosynthetic process	PGS1	2.15e-95
Hcay215003o.g465	-0.941	-0.695	NA	0.954	0.65		1	3.68e-78	0.872357	-	-	CG5098	5.7
Hcay215003o.g544	1	0.992	NA	0.984	-0.453		1	2.97e-208	0.945541	-	-	CG34135	4.49e-54
Hcay216002o.g196	-0.122	-0.894	NA	0.958	0.939		1	1.01e-82	0.844608	NCAM2	Fibronectin type 3 domain	Fas2	1.02e-73
Hcay216002o.g344	-0.435	-0.747	NA	-0.943	0.953		1	2.66e-88	0.871872	-	-	Ank2	2.1
Hcay216002o.g463	-0.844	0.427	NA	0.968	-0.944		1	2.2e-69	0.871154	-	Aldehyde oxidase and xanthine dehydrogenase_ a/b hammerhead domain	AOX3	0
Hcay216002o.g491	-0.899	-0.718	NA	0.766	-0.809		1	4.36e-88	0.878727	-	DNA repair	Slmap	0.071
Hcay217001o.g1008	-0.727	0.994	NA	-0.78	-0.999		1	1.95e-81	0.871577	FTHL17	Stores iron in a soluble_ non-toxic_ readily available form. Important for iron homeostasis. Iron is taken up in the ferrous form and deposited as ferric hydroxides after oxidation	Fer1HCH	2.78e-70
Hcay217001o.g164	-0.984	-0.638	NA	-0.953	0.853		1	4.32e-62	0.842116	IMMP1L	Peptidase S24-like	CG9240	9.62e-51
Hcay217001o.g235	0.9	NA	NA	-0.908	-0.997		1	7.13e-56	0.860588	-	It is involved in the biological process described with transmembrane transport	CG8028	4.84e-72
Hcay217001o.g275	0.723	-0.991	NA	0.427	-0.923		1	7.05e-81	0.885018	LMO1	Zinc-binding domain present in Lin-11_ Isl-1_ Mec-3.	Bx	3.12e-88
Hcay217001o.g362	-0.957	-0.906	NA	-0.709	-0.829		1	4.03e-88	0.879413	SLC30A9	Cation efflux family	ZnT49B	0
Hcay217001o.g785	-0.609	0.772	NA	-0.929	-0.867		1	6.51e-129	0.911162	GALE5	Galectin	galectin	5.4e-16
Hcay217001o.g81	-0.81	-0.607	NA	-0.688	0.882		1	2.81e-56	0.829383	USP46	Ubiquitin carboxyl-terminal hydrolase	Usp12-46	7.89e-143
Hcay217001o.g86	-0.313	-0.895	NA	0.0576	0.725		1	3.18e-133	0.910947	-	Immunoglobulin	CG13532	6.37e-29
Hcay217001o.g974	0.731	0.977	NA	-0.87	-0.665		1	5.08e-56	0.821513	NA	NA	NA	NA
Hcay218002o.g16	0.887	0.965	NA	-0.698	-0.791		1	2.41e-127	0.912039	CTSE	Xylanase inhibitor C-terminal	cathD	1.13e-177
Hcay218003o.g121	-0.937	0.829	NA	-0.756	0.968		1	4.2e-255	0.951903	ISCU	Scaffold protein for the de novo synthesis of iron- sulfur (Fe-S) clusters within mitochondria_ which is required for maturation of both mitochondrial and cytoplasmic 2Fe-2S and 4Fe-4S proteins	IscU	4.52e-68
Hcay218003o.g163	0.967	0.944	NA	0.93	0.282		1	4.29e-168	0.932612	NOP16	Ribosome biogenesis protein Nop16	CG11563	1.08e-26
Hcay218003o.g229	-0.966	0.974	NA	-0.187	0.853		1	7.02e-70	0.845496	mycbp	-	CG4546	1.3e-17
Hcay218003o.g34	0.652	-0.992	NA	0.0662	0.646		1	5.65e-192	0.936307	THAP9	Zinc finger domain in CG10631_ C. elegans LIN-15B and human P52rIPK.	CG10431	9.4e-07
Hcay218003o.g391	-0.929	-0.852	NA	-0.897	0.785		1	3.47e-57	0.821647	TOLL10	Leucine rich repeat N-terminal domain	Toll-6	0
Hcay218003o.g488	-0.94	-0.93	NA	-0.893	0.459		1	1.42e-97	0.880743	DDRGK1	DDRGK	CG5862	4.19e-11
Hcay218003o.g527	-0.685	NA	NA	-0.793	0.884		1	8.38e-110	0.863646	-	Domain of unknown function (DUF4794)	CG14568	6.36e-08
Hcay218003o.g530	0.336	NA	NA	-0.692	0.397		1	8.91e-226	0.868744	-	-	CG14568	6.38e-14
Hcay218003o.g715	-0.871	-0.835	NA	-0.175	-0.974		1	2.35e-135	0.918876	DHCR24	FAD binding domain	Agps	0.000848
Hcay218003o.g736	0.496	-0.995	NA	-0.55	-0.418		1	3.27e-70	0.84536	ECE2	Peptidase family M13	Nep3	0
Hcay219001o.g1	0.791	0.687	NA	-0.956	-0.648		1	7.74e-253	0.952723	SLC25A37	Mitochondrial carrier protein	mfrn	3.99e-89
Hcay219001o.g1022	NA	0.812	NA	-0.404	-0.981		1	7.46e-45	0.813937	BCO2	Retinal pigment epithelial membrane protein	ninaB	9.13e-142
Hcay219001o.g1106	0.724	0.844	NA	0.971	0.669		1	5.88e-51	0.812513	SART1	SART-1 family	CG6686	9.87e-146
Hcay219001o.g210	0.754	0.833	NA	0.481	0.936		1	9.12e-56	0.811167	-	Zinc finger_ C2H2 type	CG12299	1.13e-21
Hcay219001o.g353	-0.98	NA	NA	0.99	-0.796		1	8.56e-21	0.800509	-	Sugar (and other) transporter	CG1213	4.95e-121
Hcay219001o.g358	0.81	-0.832	NA	0.262	0.609		1	4.52e-89	0.880409	THOC3	mRNA-containing ribonucleoprotein complex export from nucleus	TAF1B	2.79e-16
Hcay219001o.g484	-0.951	-0.97	NA	0.904	-0.769		1	0	0.96966	-	Sodium:dicarboxylate symporter family	Eaat2	0
Hcay219001o.g494	0.381	0.898	NA	0.997	0.362		1	1.61e-56	0.818149	-	GMC oxidoreductase	CG6142	9.7e-98
Hcay219001o.g523	-0.7	0.977	NA	-0.0742	0.951		1	0	0.967725	FAM151B	Uncharacterized conserved protein (DUF2181)	CG7231	3.87e-79
Hcay219001o.g76	-0.977	0.936	NA	-0.736	-0.929		1	1.08e-277	0.960415	ATP6V1B2	ATP synthase alpha/beta family_ nucleotide-binding domain	Vha55	0
Hcay219001o.g780	0.643	0.55	NA	-0.948	0.575		1	1.08e-119	0.912066	-	-	CG15544	8.8e-22
Hcay219001o.g814	0.855	-0.873	NA	0.0324	0.899		1	1.41e-52	0.835126	kek1	Leucine rich repeat C-terminal domain	kek1	1.28e-170
Hcay219001o.g973	0.986	-0.287	NA	0.647	0.834		1	4.82e-81	0.870576	-	Insect cuticle protein	resilin	1.91e-26
Hcay219002o.g8	0.925	0.896	NA	-0.634	-0.437		1	5.35e-96	0.878362	NINL	Ninein-like	Bsg25D	1.66e-28
Hcay220003o.g13	0.952	0.637	NA	0.71	0.724		1	5.69e-104	0.890186	PBK	Protein tyrosine kinase	CG8173	2.3e-69
Hcay220003o.g149	0.892	0.965	NA	-0.876	-0.309		1	1.42e-155	0.928848	PPIP5K2	Histidine phosphatase superfamily (branch 2)	l(1)G0196	0
Hcay220003o.g151	-0.789	0.149	NA	0.945	0.802		1	2.07e-53	0.829578	PEX5L	Tetratricopeptide repeat	Pex5	1.39e-109
Hcay220003o.g231	0.899	-0.524	NA	0.695	-0.981		1	2.47e-137	0.920537	RIF1	Replication timing regulatory factor 1	Rif1	3.46e-05
Hcay220003o.g377	-0.867	-0.853	NA	-0.844	0.975		1	5.85e-50	0.813137	DNAJB6	DnaJ molecular chaperone homology domain	mrj	2.32e-77
Hcay220003o.g40	0.65	0.481	NA	1	0.88		1	2.92e-123	0.866368	AURKA	Serine/Threonine protein kinases_ catalytic domain	aurA	4.15e-122
Hcay220003o.g553	0.855	-0.0129	NA	0.955	0.987		1	1.99e-146	0.906022	KMO	FAD binding domain	cn	3.32e-167
Hcay220003o.g794	0.713	-0.989	NA	-0.939	-0.461		1	3.45e-47	0.805397	CUL2	Cullin	Cul2	0
Hcay220003o.g886	-0.914	-0.927	NA	0.9	0.535		1	2.81e-62	0.839181	SUGT1	SGS domain	Sgt1	1.64e-43
Hcay220003o.g949	-0.664	0.964	NA	0.515	-0.27		1	1.91e-58	0.828296	-	Sugar (and other) transporter	CG42269	0
Hcay220003o.g996	-0.974	0.917	NA	-0.672	0.692		1	4.82e-253	0.955968	SAMM50	Surface antigen	CG7639	6.41e-67
Hcay221001o.g478	-0.638	0.987	NA	-0.67	-1		1	1.03e-52	0.830079	GPR107	Lung seven transmembrane receptor	CG12121	9.29e-159
Hcay221001o.g503	0.948	-0.941	NA	-0.138	-0.974		1	1.23e-145	0.944663	-	-	Hmt-1	5
Hcay221001o.g621	-0.188	-0.646	NA	-0.957	-0.963		1	1.66e-113	0.891593	TPI1	Triosephosphate isomerase	Tpi	2.82e-125
Hcay221001o.g647	0.223	0.652	NA	0.867	-0.748		1	1.22e-56	0.825832	PXDN	Leucine rich repeat C-terminal domain	Pxn	0
Hcay221001o.g709	-0.997	-0.897	NA	0.763	-0.357		1	7.16e-56	0.80704	NA	NA	dpy	0.014
Hcay221001o.g737	0.503	0.839	NA	-0.771	-0.925		1	1.22e-88	0.884653	GPRNNA21	Serpentine type 7TM GPCR chemoreceptor Srv	DopEcR	4.64e-167
Hcay221001o.g750	-0.819	-0.922	NA	0.971	-0.87		1	1.67e-155	0.92866	STX6	It is involved in the biological process described with Golgi vesicle transport	Syx6	9.25e-77
HcayUM187.g8	-0.943	0.373	NA	-0.89	-0.932		1	2.46e-37	0.801321	-	glucose import	nebu	6.12e-24
La	0.732	-1	NA	0.793	0.533		1	2.39e-191	0.939673	NA	NA	La	1.31e-68
