# Supplementary material for: Genetic, developmental, and neural changes underlying the evolution of butterfly mate preference
Source: PLoS Biol. 2025 Mar 11;23(3):e3002989. doi: 10.1371/journal.pbio.3002989 (PMC12136153; doi:10.1371/journal.pbio.3002989)
Supplement: S8 Table — (XLSX) [file pbio.3002989.s020.xlsx]

## Sheet: table S8 - EVM Weights
table S8. Evidence weights used in EVM-based annotation of the H. c. alithea genome.
Evidence	Type	Weight
GlimmerHMM	ABINITIO_PREDICTION	1
Genemark-ET	ABINITIO_PREDICTION	1
Augustus	ABINITIO_PREDICTION	1
High-Quality Augustus	OTHER_PREDICTION	4
TransDecoder Assemblies	OTHER_PREDICTION	10
Exonerate	PROTEIN	4
PASA Assemblies	TRANSCRIPT	5
